# Supplementary material for: Construction and Validation of a Tumor Microenvironment-Based Scoring System to Evaluate Prognosis and Response to Immune Checkpoint Inhibitor Therapy in Lung Adenocarcinoma Patients
Source: MDPI journal article supplement (doi:10.3390/genes13060951), 2022-05-26
Supplement: s1 [file s1]

## Supplementary Material

### 1 Supplementary Figures and Tables

#### 1.1 Supplementary Figures

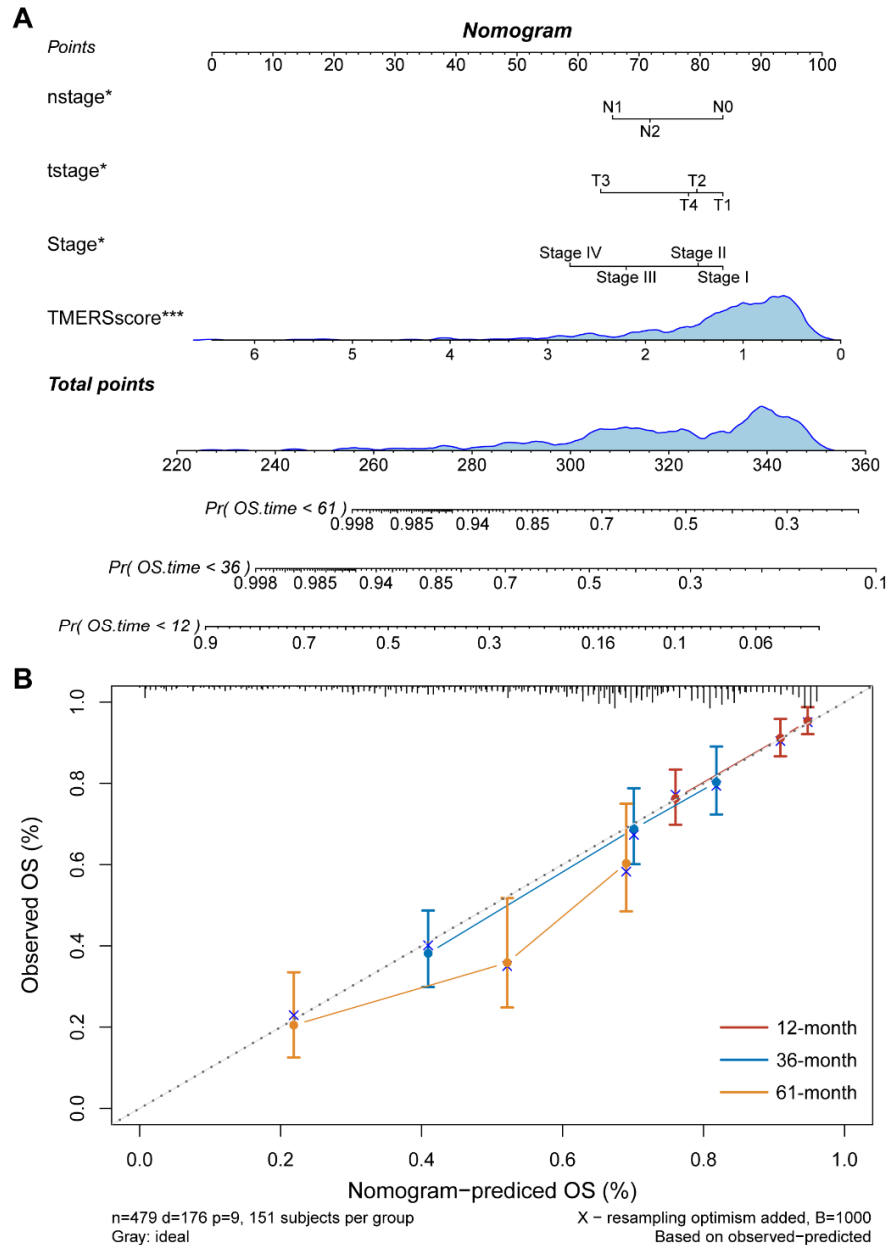

**Supplementary Figure S1.** Nomogram and calibration curve based on TMERSscore built in TCGA-LUAD cohort. (A) Nomogram for predicting overall survival at 1, 3, and 5 years. (B) Calibration curves for 1, 3 and 5 year overall survival in LUAD patients. \*  $p < 0.05$ , \*\*\*  $p < 0.001$ .

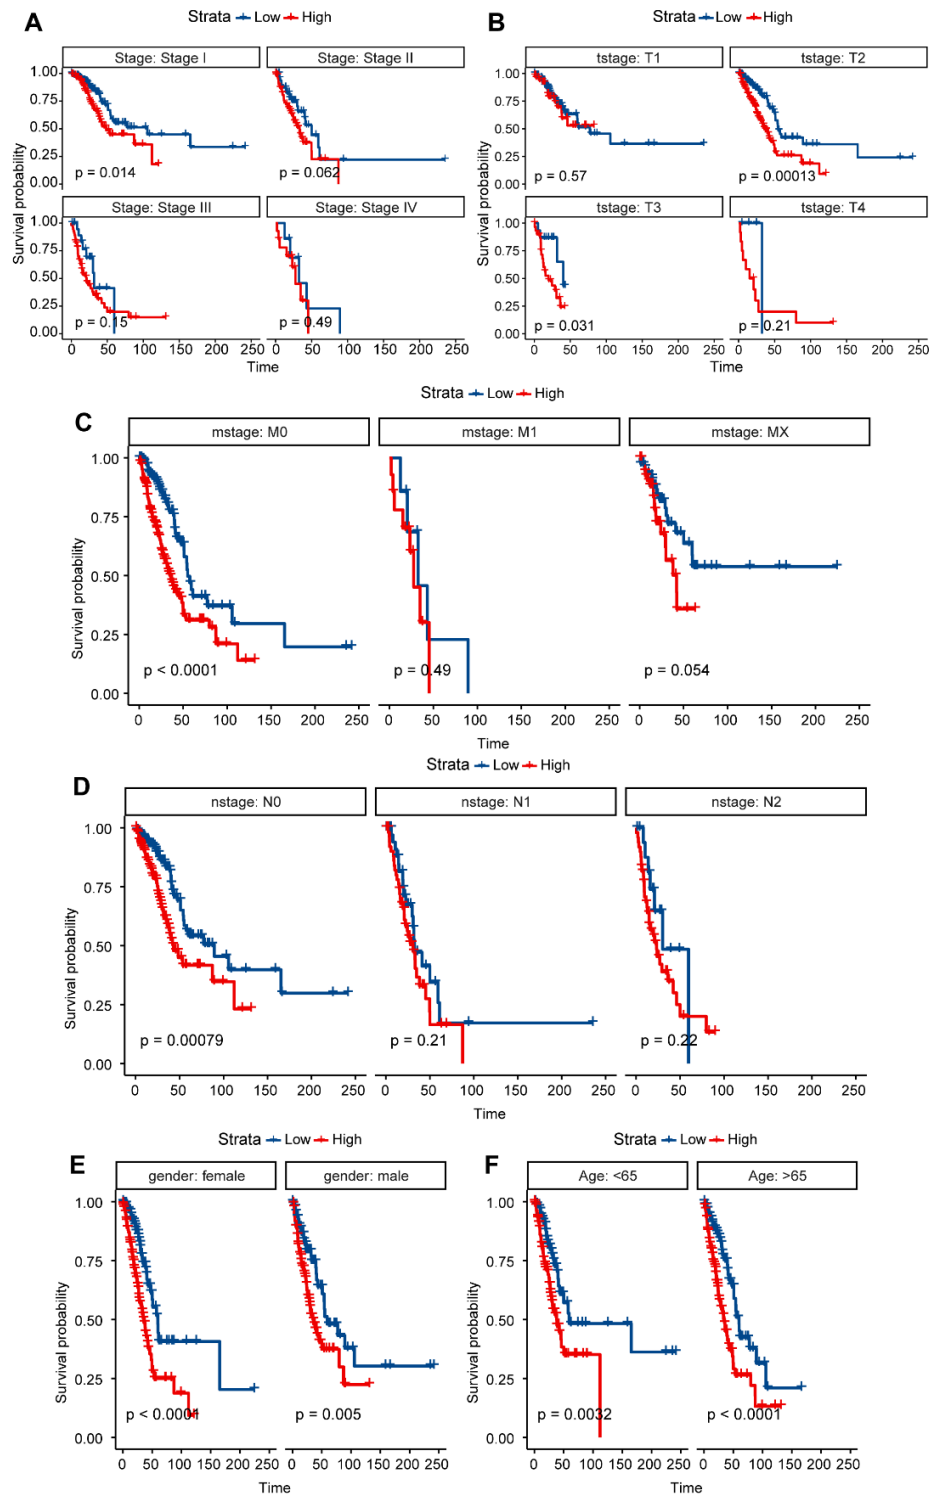

**Supplementary Figure S2.** Kaplan-Meier survival curves of TMERSscore in different clinical-stage subgroups. (A) (B) (C) (D) (E) (F) are the survival curves of TMERSscore in different AJCC pTNM stage, T stage, M stage, N stage, gender, and age subgroups, respectively.

## **1.2 Supplementary Tables S1-S4**

**Supplementary Table S1.** Tumor microenvironment related signatures (n = 303) and their contained genes.

**Supplementary Table S2.** Gene expression profiles of SKCM patients receiving ICI immunotherapy downloaded from CRI iAltas.

**Supplementary Table S3.** Metadata of SKCM patients receiving ICI immunotherapy downloaded from CRI iAltas.

**Supplementary Table S4.** Results of univariate Cox regression analysis of significant tumor microenvironment-related signatures.
