# Supplementary material for: Construction and Validation of a Tumor Microenvironment-Based Scoring System to Evaluate Prognosis and Response to Immune Checkpoint Inhibitor Therapy in Lung Adenocarcinoma Patients
Source: Genes (Basel). 2022 May 26;13(6):951. doi: 10.3390/genes13060951 (PMC9222903; doi:10.3390/genes13060951)
Supplement: Supplementary file 1 [file genes-13-00951-s001.zip]

Archive with 7 entries (7 files):
- genes-1721155-Supplementary_Material.pdf
- Supplementary figure S1.tif
- Supplementary figure S2.tif
- Supplementary table S1.xlsx
- Supplementary table S2.CSV
- Supplementary table S3.CSV
- Supplementary table S4.xlsx
