# Supplementary material for: Construction and Validation of a Tumor Microenvironment-Based Scoring System to Evaluate Prognosis and Response to Immune Checkpoint Inhibitor Therapy in Lung Adenocarcinoma Patients
Source: Genes (Basel). 2022 May 26;13(6):951. doi: 10.3390/genes13060951 (PMC9222903; doi:10.3390/genes13060951)
Supplement: Supplementary file 1 [file genes-13-00951-s001.zip › Supplementary table S1.xlsx]

## Sheet: First portion
First portion: 184 immune cell signatures and their contained genes
Angiogenesis	CDH5	CLEC14A	LDB2	ECSCR	MYCT1	RHOJ	VWF	TIE1	KDR	ESAM	PTPRB	SPARCL1	EMCN	ROBO4	ENG	TEK	S1PR1	A2M	JAM2	COL15A1	PECAM1	CALCRL	CLEC3B	PLVAP	RGS5	LRRC32	EBF1	ADCY4	ACVRL1	APLNR	TM4SF18	GNG11	CNRIP1	ZNF423	GIMAP8	PDGFD	ITGA9	EDNRB	ADGRL4	ADGRF5	ADGRA2
APM1	HLA-A	HLA-B	HLA-C	TAP1	TAP2	TAPBP	B2M
APM2	HLA-DMA	HLA-DMB	HLA-DOA	HLA-DOB	HLA-DPA1	HLA-DPB1	HLA-DPB2	HLA-DQA1	HLA-DQA2	HLA-DQB1	HLA-DQB2	HLA-DRA	HLA-DRB1	HLA-DRB5	HLA-DRB6
B_cell_PCA_16704732	SLC22A3	IGKC	FGD2	SIDT2	CACNA2D2	USP6NL	CPSF2	UBR5	NIPAL4	WEE1	PMAIP1	SLC2A5	BEND4	SP140	GLDC	GSTZ1	EML6	FCRLA	LRMP	BTK	HLA-DMB	SAV1	PLEKHF2	STAG3	HHEX	LINC00926	WDR11	SSU72	CD19	SYNGR2	ZNF532	TRIM56	MEF2C	INPPL1	NFKBIE	JUP	EGR1	FCRL2	TBC1D1	ANKH	TRIO	RGS13	SSPN	ATG4A	C11orf24	PRKCE	RALGPS2	AIM2	PIK3AP1
Bcell_21978456	IGHA1	IGHG1	IGHM	IGH	IGHA2	IGHD	IGHG3	IGHG4	IGHV4-31	IGHV1-69	IGLJ3	IGHV3-23	IGK	IGHG2	IGKC	GUSBP11	IGLC1	IGLV1-44	CYAT1	IGLV@	IGKV1D-13	IGLL3P	IGLL5	SCFV	NA
Bcell_mg_IGJ	IGHM	IGHG3	IGHV1-69	IGKC	IGLJ3	IGKV1D-13	IFI6	IGHA1	IGKV1OR2-108	IGKV1OR15-118	CTA-246H3.1	JCHAIN	IGL	CXCL8	LOC652128	NTN3
Bcell_receptors_score	CD19	CD1C	CD1D	CD200	CD22	CD24	CD38	CD72	CD74	CD79A	CD79B	CD83	CD86	FCGR2B	MS4A1
Buck14_score	CXCL13	CLIC5	RGS4	RPS28	RFX7	EXOC7	HAPLN1	ZNF3	SSX3	PRRG3	ABO	PRTN3	MATN1	AGFG2
CD103neg_mean_25446897	ABCC3	APOE	C1QA	C1QB	C1QC	C5AR1	LYVE1	MERTK	MRC1	MS4A7	SIGLEC1	STAB1	TLR7	TMEM119	TMEM37	TREM2	CYP4F18/CYP4F3A
CD103pos_CD103neg_ratio_25446897	CD103neg_mean_25446897	CD103pos_mean_25446897
CD103pos_mean_25446897	BATF3	BTLA	CCR7	CLEC9A	FLT3	IRF8	KIT	XCR1	ZBTB46	MYCL
CD68	CD68
CD8_CD68_ratio	CD8A	CD68
CD8_PCA_16704732	DUSP2	CST7	FCGBP	S100B	ADRB2	KLRC4	CCL5	IL2RB	GNLY	KLRC1	CD8A	C1orf21	CCL4L1	TBX21	TSPAN32	KLRG1	PRF1	GZMH	ADGRG1
CD8A	CD8A
CHANG_CORE_SERUM_RESPONSE_UP	CEP78	LSM3	LRRC40	STK17A	RPN1	JUNB	NUP85	FLNC	HMGN2	RPP40	UQCR10	AIMP2	CHEK1	VTA1	EXOSC8	CENPO	PNO1	SLC16A1	WDR77	UBE2J1	NOP16	NUDT1	SMC2	SLC25A5	DLEU2	PDAP1	COX17	BCCIP	PLG	RGS8	SNRPC	PLK4	NUTF2	LSM4	SMS	EBNA1BP2	VDAC1	PSMD14	MYCBP	SMURF2	GNG11	F3	IL7R	BRIP1	HNRNPA2B1	DCK	ALKBH7	MSN	TPM1
Chemokine12_score	CCL2	CCL3	CCL4	CCL5	CCL8	CCL18	CCL19	CCL21	CXCL9	CXCL10	CXCL11	CXCL13
CSF1_response	CORO1A	MNDA	CCRL2	SLC7A7	HLA-DMA	RNASE6	TLR2	CTSC	LILRB4	CTSS	RASSF4	MSN	CYBB	LAPTM5	DOCK2	FCGR1A	EVI2B	ADCY7	CD48	ARHGAP15	ARRB2	SYK	BTK	TNFAIP3	FCGR2A	VSIG4	IL10RA	IFI16	ITGB2	IL7R	TBXAS1	FMNL1	FLI1	RASSF2	LYZ	CD163	CCL2	FCGR2B	MERTK	CD84	CD53	CD86	CTSL	EVI2A	TNFRSF1B	CXCR4	LCP1	SAMHD1	CPVL
CSR_Activated_15701700	ADAMTS1	ADD3	APOD	APP	ARHGAP12	ARHGEF3	ATP6V0A1	AXIN2	BBC3	BCCIP	BCL6	BRCA2	BRIP1	C11ORF24	C1S	CAMLG	CBX1	CCNG2	CCNL2	CCT5	CDC14B	CDCA4	CDK2	CDKN1A	CDKN1C	CENPJ	CHEK1	CKLF	CLCN6	CLIC2	CNTNAP1	COPS6	CORO1C	COTL1	COX17	CRTAP	CSF1	CST3	CTNS	CTSF	CYP27A1	DCK	DCLRE1B	DHFR	DLEU1	DLEU2	DNM1	DPP7	DPYSL2
CTLA4_data	CTLA4
DAP12_data	TYROBP
G_CD3E	CD3E	CD3D	IL10RA	CD3G	JAML
G_CYTH4	CYTH4	NCF4	RAC2	IL2RB	CSF2RB
G_GIMAP4	GIMAP4	GIMAP5	GIMAP6	GIMAP8	GIMAP7	GIMAP1
G_HLA_DPA1	HLA-DPA1	HLA-DRA	HLA-DPB1	HLA-DRB1	HLA-DMB	HLA-DMA	HLA-DOA	HLA-DQA1	HLA-DQB1	HLA-DRB5
G_LILRB4	LILRB4	LILRB2	LAIR1	LILRB1	LILRB3	LILRA6	OSCAR
G_SIGLEC9	SIGLEC9	SIGLEC7	FPR3	SIGLEC5	CD33	SIGLEC10	SIGLEC14	FPR1
G_SLAMF6	SLAMF6	SLAMF7	CD48	LY9	SLAMF1	ARHGAP30	SLAMF8
GRANS_PCA_16704732	SPTBN2	SLPI	CMTM6	SLC9A7	SLC25A37	GABARAP	QPCT	PARPBP	AOX1	PPM1A	RER1	LAMP2	SGCE	OSBP2	FAXDC2	TGFA	LRRK2	SPRTN	NFIA	MOG	BNIP3L	CDA	AGO4	CAMSAP2	TNFRSF10A	CYP4F3	ELF4	RAB2B	TST	TBC1D10C	IL18RAP	BST2	FIS1	SERPINE1	ATP6V0C	SLC31A2	ARRB2	ZNF598	RTN3	OAZ1	GYPB	USP47	CHI3L1	C9orf78	BACH1	SLC7A7	ALOX5AP	HLA-E	TNFRSF10C
HER2_Immune_PCA_18006808	AOC1	ACTN1	ACVR1	ACVRL1	ADAM8	AGER	AIF1	ALDH1A1	ALDOB	AKR1B1	ALOX5AP	AMPD1	AMPD3	BIN1	ANG	ANGPT2	ANK1	AOAH	APBA2	BIRC3	APOC4	APOE	FASLG	RHOG	ARHGAP1	ARRB2	ATP2A1	B2M	BCL2A1	TNFRSF17	BDH1	CXCR5	BNIP3	DST	BTK	BTN1A1	SERPING1	C1QA	C1QB	C1R	C1S	C2	C3	C3AR1	FMNL1	CAPN2	CASP1	CASP4	RUNX1
ICR_ACT_SCORE	IFNG	IRF1	STAT1	IL12B	TBX21	GZMB	GNLY	PRF1	GZMH	GZMA	CXCL10	CXCL9	CCL5	CD8A	CD8B	PDCD1
ICR_INHIB_SCORE	CTLA4	FOXP3	IDO1	CD274
ICR_SCORE	IFNG	IRF1	STAT1	IL12B	TBX21	GZMB	GNLY	PRF1	GZMH	GZMA	CXCL10	CXCL9	CCL5	CD8A	CD8B	CTLA4	PDCD1	FOXP3	IDO1	CD274
ICS5_score	CXCL13	CLIC5	HLA-F	TNFRSF17	XCL2
IFIT3	IFIT3	IFI44L	IFIT1	RSAD2	MX1	IFI44	OAS2	CMPK2	IFI6	IFIT2
IFN_21978456	IFI27	MX1	ISG15	IFIT1	IFIT3	RSAD2	IFI44L	IFI44	OAS1	OAS2	OAS3	HERC6	OASL
IFNG_score_21050467	MAP3K10	CSRP3	FOSL1	HLA-B	SF3A1	XRCC6	CEBPD	HLA-A	NMI	IFI35	HIF3A	TAS2R5	C1S	COL16A1	PSME1	IFITM1	CYCS	BAK1	EPS15	GBP1	FAS	PML	HADH	EIF2B1	HLA-E	HADHB	IRF1	ADAR	IFIT3	SDCBP	ATP6V0B	ZFP36L2	TRIM21	PRAME	ELK4	BBC3	PSMB10	CASP8	PHLDA1	PPP3CA	BTG1	RBBP4	PMAIP1	TEAD4	SRP9	ISG15	BST2	PYHIN1	IL15RA
IgG_19272155	IGKV1OR2-118	IGKV1D-13	IGLL3P	IGKV1-5	IGHV1-69	POU2AF1	IGLJ3	GUSBP11	IGLC2	IGLV3-25	IGKC	IGLV2-14	IGHG1	IGHM	IGLV4-3	IGHD	IGHA1	IGL	IGH	IGLC1	LOC96610
IGG_Cluster_21214954	CD27	IL2RG	CD79A	PIM2	POU2AF1	IGKC	IGLV3-25	IGL	TNFRSF17	NTN3	HLA-C	LAX1	JCHAIN	CXCL8
IL12_score_21050467	CD3E	IL12B	STAT4	IFNG	JAK2	IL12RB1	IL12RB2	MAPK14	IL12A	MAP2K6	TYK2	JUN	IL18	CXCR3	CD3G	ETV5	CCR5	CD3D	MAPK8	IL18R1	CD247	TRA	TRB
IL13_score_21050467	IL13	IL13RA2	JAK2	IL13RA1	TYK2	IL4R	JAK1
IL2_score_21050467	RAF1	IL2	STAT5A	IL2RB	SOS1	GRB2	STAT5B	HRAS	LCK	JUN	MAPK3	IL2RG	JAK1	JAK3	CSNK2A1	MAP2K1	FOS	SHC1	SYK	ELK1	IL2RA	MAPK8
IL4_score_21050467	JAK3	GRB2	STAT6	SHC1	IL4	IL4R	AKT1	IRS1	IL2RG	JAK1	RPS6KB1
IL8_21978456	CXCL1	CXCL8	CXCL2
Immune_cell_Cluster_21214954	WARS	IDO1	RNASE6	GPR65	MNDA	LAMP3	TNFAIP8	LYN	TNFAIP3	PLAC8	IL7R	CSF2RB	IRF1	TNFRSF1B	ADAMDEC1	SLAMF8	SIRPG	LTB	PTPRCAP	CCR7	SPOCK2	PLEK	CD74	HLA-DMA	HLA-DRA	HLA-DMB	FCER1G	TYROBP	LAPTM5	ITGB2	C1QA	STAT1	CXCL11	CXCL10	GBP1	TAP1	PSMB9	GIMAP4	SRGN	FGL2	HCLS1	ARHGAP25	LCK	EVI2B	ARHGAP15	CYTIP	GZMA	LCP2	CD53
Immune_NSCLC_score	PLEK	RHOH	TCEA2	CLEC4E	USP51	WFDC10B	SLC4A3	CD53	SCFV	PRDM13	OBSL1	TAGAP	IGLV6-57	CD38	FKBP9	ADAMTSL2	CD48	GNPTAB	CNIH3	PSMA6	SHROOM1	GPSM1	TRO	GSTT2	NQO2	EAF2	MUC4	PABPC1	PLA2G7	AOAH	TMSB4X	ACOT8	GIMAP7	ASAH1	TRIM45	EXT2	IFI6	KCNE3	CTSF	RASL11B	HMGCL	IGHA1	C1QTNF3	IL11RA	ADRA2C	IGKC	CEACAM5	PURB	TPD52
Interferon_19272155	RSAD2	OAS3	IFI44	ISG15	DDX60	IFI44L	IFI6	MX1	IFIT3	IFI27	IFIT1	OAS1	OAS2
Interferon_Cluster_21214954	C19orf66	BST2	SP110	PARP12	IFIT5	OAS1	IRF9	USP18	DDX58	MX2	IFI27	OAS2	IFI6	IFIT3	IFI44L	IFI44	IFIT1	ISG15	MX1	RSAD2	OAS3	HERC6	HERC5	DDX60	PLSCR1	UBE2L6	SAMD9	RTP4	XAF1	NMI	IFITM1	IFITM3	ISG20	PSME2	PSME1	IRF7
IR7_score	C1QA	IGLC2	LY9	TNFRSF17	SPP1	XCL2	HLA-F
LCK_19272155	ARHGAP15	KLRK1	SASH3	ARHGAP25	SLAMF1	GIMAP5	SH2D1A	CCR7	ITK	TRBV19	RAC2	CORO1A	PIK3CD	LPXN	PRKCB	STAT4	GMFG	SELPLG	FGL2	EVI2B	CSF2RB	GZMK	SAMSN1	GIMAP4	IRF8	NCKAP1L	IL10RA	TRAC	INPP5D	PLAC8	CCL5	CD247	LTB	IL2RG	HCLS1	IL7R	CD53	LCK	CD3D	CD27	GZMA	SELL	TRBV21-1	CD2	CD48	SLA	LCP2	SRGN	PTPRC
LIexpression_score	CCL5	CD19	CD37	CD3D	CD3E	CD3G	CD79A	CD79B	CD8A	IGHG3	IGLC1	CD14	LCK	LTB	MS4A1	CD247	CD8B	JCHAIN
LYM	CD53	SASH3	IL10RA	NCKAP1L	LCP2	ITGAL	CCR5	CD4	MYO1F	ARHGAP30
LYMPHS_PCA_16704732	UQCRB	SESTD1	QTRT1	TIPIN	REL	STXBP2	HSBP1	COX6C	RPL11	MECOM	ANKRD28	JUN	ZC3H15	RPL23	RPS6KA2	EEF2	TMA7	RPS6	RPL27	RPS21	COX7B	PRRC2B	CYP17A1	NSUN4	TOMM34	MINOS1	STAMBPL1	FGF9	ATF4	RPL35	RPL31	RPS24	DCLRE1C	C5orf49	FAM162A	ITGB2	SLC19A1	RPL32	TPP2	MALAT1	LSM3	ATXN2L	SERPINB6	TPI1	EIPR1
MCD3_CD8_21214954	SRPX	IGFBP6	ENPP2	SEMA3G	CIDEA	GPX3	GPD1	CD36	RBP4	AOC3	LPL	FABP4	ADIPOQ	PLIN1	ADH1B	FHL1	LEP	CD34	SPRY1	PROS1	AKAP12	JAM3	NDN	SPARCL1	ITM2A	AQP1	C7	TSPAN7	JAM2	CAV1	GNG11	LDB2	CDH5	ABCA8	MEOX1	VWF	CLDN5	ERG	SLIT2	PECAM1	CDO1	CFD	ACKR1	LHFPL6	PLPP1
MDACC_FNA_1_20805453	TMEM176B	SLCO2B1	CKAP2	CD74	VCAM1	IGLL1	CCL2	GPNMB	PTGDS	CD163	MAFB	HLA-DRB1	PLTP	APOE	C1QB	NTN3	PECAM1	IGKV1D-13	IGKV1OR2-108	IGLJ3	IGKC	IGL	IGHG3	IGHM	HLA-DPA1	HLA-DQB1	HLA-DQA1	IGHG1	C1QA	HLA-DRA	JCHAIN
MHC_I_19272155	HLA-G	HLA-A	HLA-B	HLA-C	HLA-F
MHC_II_19272155	CTSS	CD74	HLA-DRB1	HLA-DQA1	HLA-DMB	HLA-DPA1	HLA-DPB1	HLA-DMA	HLA-DRA	LCP2	SRGN	PTPRC
MHC1_21978456	HLA-E	HLA-G	HLA-B	HLA-C	HLA-J	HLA-F	HLA-A
MHC2_21978456	HLA-DPB1	HLA-DMB	CD74	HLA-DRB5	HLA-DRB1	HLA-DRB4	HLA-DRB3	HLA-DRA	HLA-DPA1	HLA-DQA1	HLA-DQA2	HLA-DMA	HLA-DQB1	LOC100509457	LOC101060835
Minterferon_Cluster_21214954	STAT1	IL18BP	XAF1	B2M	RSAD2	EPSTI1	PSMB8	PSMB9	ZC3HAV1	IFI35	DDX58	GBP7	CXCL10	CCL5	GBP6	CXCL9	CD274	HELZ2	UBA7	LGALS3BP	PARP9	IRF9	ADAR	IFIT2	OASL	DDX60	IFIH1	RTP4	GBP4	IFI44	MX1	ISG15	BST2	USP18	IFIT1	OAS2	ZBP1	PARP14	IRGM	STAT2	PARP12	SP100	GBP1	BATF2	NMI	SLFN13	GVINP1	IRF1
Module11_Prolif_score	CDKN3	NDC80	RNASEH2A	CENPA	SMC2	CENPE	RAD51AP1	PLK4	NMU	KIF2C	TMSB15A	UBE2C	CHEK1	ZWINT	OIP5	CRABP1	ECT2	EIF4EBP1	EZH2	FEN1	HSPA4L	TPX2	FOXM1	NCAPH	PRAME	PDSS1	KIF4A	RAD54B	ASPM	FBXO5	ATAD2	RACGAP1	GPSM2	DONSON	HMMR	BIRC5	KIF11	LMNB1	MAD2L1	MCM4	MCM5	MKI67	MMP1	MYBL1	MYBL2	NEK2	NUSAP1	GTSE1	GINS2
Module3_IFN_score	IFI44	IFI44L	DDX58	IFI6	IFI27	IFIT2	IFIT1	IFIT3	CXCL10	MX1	OAS1	OAS2	OAS3	HERC5	SAMD9	HERC6	DDX60	RTP4	IFIH1	STAT1	TAP1	OASL	RSAD2	ISG15
Module4_TcellBcell_score	CD96	CD52	SEMA4D	CXCL13	SP140	CCR7	CTSW	DOCK2	EVI2B	FCN1	KLRK1	FLI1	PLCL2	IPCEF1	PPP1R16B	CCDC69	STAP1	GPR18	ICOS	GPR171	GZMA	GZMB	GZMK	IL2RB	IL2RG	IL7R	ITGA4	ITK	KLRB1	LCK	LGALS2	LRMP	LTB	SH2D1A	CXCL9	NCF4	GIMAP6	IL21R	TRAT1	PLAC8	UBASH3A	POU2AF1	RHOF	LAX1	BANK1	SIRPG	PRF1	DOCK10	PRKCB
Module5_TcellBcell_score	IGSF6	LILRB2	BTN3A3	UBD	CXCL13	GNLY	CXCR6	CTSC	HCP5	PIM2	SP140	CCR7	CTSS	CYBB	FCN1	TFEC	SEL1L3	GBP1	LAMP3	ADAMDEC1	GPR18	ICOS	GPR171	GZMH	GZMB	GZMK	BIRC3	IFNG	IL2RG	IL15	IDO1	CXCL10	IRF1	ISG20	ITK	LAG3	LCK	LYN	CXCL9	NKG7	TRAT1	PLAC8	POU2AF1	CRTAM	SLAMF8	PSMB9	PTPN7	SLAMF7	BCL2A1
NHI_5gene_score	GBP1	STAT1	IGLL5	OCLN	IGK
PD1_data	PDCD1
PD1_PDL1_score	PDCD1	CD274
PDL1_data	CD274
Rotterdam_ERneg_PCA_15721472	PARP4	COL2A1	FUT3	GAS2	MYH2	SAT1	TNFSF10	CEP57	ANAPC15	GABRQ	RFX7	BCL2L14	RPL23AP7	ZNF362
STAT1_19272155	TAP1	GBP1	IFIH1	PSMB9	CXCL9	IRF1	CXCL11	CXCL10	IDO1	STAT1
STAT1_score	STAT1	CXCL10	TAP1	CXCL11	CXCL9	MX1	LAMP3	ISG15	RTP4	HERC6	IFI44L	MX2	IFIT3	HERC5	RSAD2	DDX58	CCL5	ADAMDEC1	CD2	HCP5	NMI	SPOCK2	CCL8	TRIM22	LYZ	IRF1	LAG3	TFEC	UBD	SP140	CTSC	IFI6	PLA2G7	CD3G	PLAC8	FGL2	GZMK	CD48	STAT4	GPR18	P2RX5	IFI30	SH2D1A	LAPTM5	CD69	PTPN7	IRF8	PIM2	ETV7
T_cell_PCA_16704732	SLC35D2	CD3E	S100A8	GATA3	GIPC1	CCL5	PRKCA	SLCO3A1	CEP85L	KLRB1	CD5	SH2D1A	S100A10	IL6ST	CD247	CD6	SBK1	GBP2	KLRG1	TIAM1	MYBL1	TACC3	RASGRP1	LAT	OSBP2	LIMA1	UPP1	RNF213	MAPKAPK5	ACVR2B	HSPA1L	LEF1	MRPL27	LRIG1	RARRES3	DPP4	TRA	APBA2	SPOCK2	MLLT3	PCSK5	BCL11B	VIPR1	RUNX2	GALT	ITGA6	OLAH	CD3G	DNASE1L3
TAMsurr_score	CXCL10	CXCL11	CCL8	LAMP3
TAMsurr_TcClassII_ratio	CXCL10	CXCL11	CCL8	LAMP3	CD2	CD3G	CD8A	IFNG	TNF	GZMB	GZMH	PRF1	ZAP70	HLA-DMA	HLA-DOA	HLA-DOB	HLA-DPA1	HLA-DPB1	HLA-DQA1	HLA-DQB1	HLA-DQB2	HLA-DRA	HLA-DRB1	HLA-DRB2	HLA-DRB3	HLA-DRB4	HLA-DRB5	HLA-DRB6	CIITA	CD74
TcClassII_score	CD2	CD3G	CD8A	IFNG	TNF	GZMB	GZMH	PRF1	ZAP70	HLA-DMA	HLA-DOA	HLA-DOB	HLA-DPA1	HLA-DPB1	HLA-DQA1	HLA-DQB1	HLA-DQB2	HLA-DRA	HLA-DRB1	HLA-DRB2	HLA-DRB3	HLA-DRB4	HLA-DRB5	HLA-DRB6	CIITA	CD74
Tcell_21978456	CORO1A	LCK	GZMK	LAPTM5	IL10RA	CD27	SELL	TRAC	CD48	CD2	TRBC1	CD3D	IL23A	ITK	CD53	EVI2B	PTPRC	YME1L1	TRAV20	TRAJ17	SAMSN1	ARHGAP25	PLAC8	CD52
Tcell_receptors_score	CD3D	CD3E	CD3G	CD247
TGFB_PCA_17349583	COL1A1	FN1	MMP9	SERPINE1	SPARC	TAGLN	TGFB1	TGFB1I1	TGFB3	TGFBI	TGFBR1	TGIF1	THBS1	TGIF2	CTGF
TGFB_score_21050467	MMP3	MARCKSL1	IGF2R	LAMB1	SPARC	FN1	ITGA4	SMO	MMP19	ITGB8	ITGA5	NID1	TIMP1	SEMA3F	RHOQ	CTNNB1	MMP2	SERPINE1	EPHB2	COL16A1	EPHA2	TNC	JUP	ITGA3	TCF7L2	COL3A1	CDH6	WNT2B	ADAM9	DSP	HSPG2	ARHGAP1	ITGB5	IGFBP5	ARHGDIA	LRP1	IGFBP2	CTNNA1	LRRC17	MMP14	NEO1	EFNA5	ITGB3	EPHB3	CD44	IGFBP4	TNFRSF1A	RAC1	PXN
TREM1_data	TREM1
Troester_WoundSig_19887484	ADH1A	APOH	BMPR1B	DST	CAPN6	CD86	CDK4	COL17A1	COX7B	CSF3	CTSK	DMBT1	ARID3A	DSC3	ELANE	EYA4	F3	FABP4	FAP	FBLN1	EFEMP1	FPR1	FRZB	GJB5	HBB	HDC	HMGA1	HPCAL1	IL1B	IL13RA2	IDO1	INHBA	KRT6A	KRT6B	KRT34	AFF3	LAMA3	LAMC2	LTBP2	LUM	MSMB	ND4	NODAL	OGN	PCDH8	PDGFRL	PER1	PFKFB3	PITX1
Activated_B_cell	TNFRSF17	BLK	CD19	MS4A1	CD27	CD38	CD79B	CR2	GNG7	HLA-DOB	IGHM	IGKC	CD180	PNOC	CCL21	SPIB	TCL1A	ARHGAP25	ADAM28	MICAL3	BACH2	FCRL2	AKNA	CLECL1	CLEC9A	CLEC17A
Activated_CD4_T_cell	BIRC3	CCNB1	CCR7	DUSP2	ETS1	IARS	ITK	KIF11	RGS1	CCL4	CCL5	CCL20	SELL	PRC1	EXO1	AIM2	KNTC1	PSAT1	TRAT1	EXOC6	SAMSN1	NUF2	BRIP1	ESCO2	RTKN2
Activated_CD8_T_cell	CD3D	CD3E	CD3G	CD8A	CD37	CD69	CETN3	CSE1L	GZMH	GZMA	GZMK	IL2RB	LCK	NKG7	ZAP70	MPZL1	GNLY	AHSA1	CCT6B	ADRM1	TIMM13	C1GALT1C1	PTRH2	GEMIN6	GPT2	PIK3IP1
Activated_dendritic_cell	ABCD1	RHOA	ATP6V1A	BCL2L1	C1QB	C1QC	CAPG	CEACAM8	HLA-DQA2	NOS2	RAB1A	SLA	TNFAIP2	TNFSF14	TNFRSF6B	SIGLEC5	VNN2	CCNA1	SNURF	CD302	SRA1	ACTR3	UBD	XPO6	CD207	SLC25A37	TREM1	SPCS3	SLAMF9	CLEC4C	TREML4	TREML1	CCL3L3	ATP5F1B	ATP5MG
CD56bright_natural_killer_cell	ABAT	ENTPD5	CDH3	CLIC2	CSF1	CSNK2A2	CSTA	CSTB	CTSD	CYP27B1	GATA2	GMPR	HDC	HOXA1	KRT86	GPR137B	DYNLL1	COX7A2L	HS2ST1	HS3ST1	FST	EIF3M	HCP5	HEY1	DCAF12	C5orf15	MLST8	BCL11B	NAA16	ELMOD3	CDHR1	MYL6B	CREB3L4	SMCO4	HDGFL2	METTL21A	TOGARAM2	CTPS1	C1QA	ClQB
CD56dim_natural_killer_cell	CYP27A1	GRIN1	HLA-E	KIR2DS1	KIR2DS5	NOTCH3	PSMC4	RPL37A	UPP1	DYRK2	AKR7A3	IL21R	GPRC5C	DDX55	PORCN	KIR2DS2
Central_memory_CD4_T_cell	ANXA2P2	AQP3	BMI1	KLF5	CD63	COL4A1	CYLD	FYN	XRCC6	GSS	ITGB1	ITGB2	LSP1	SMAD4	NDUFB9	PKM	STX4	VIM	TRADD	IFITM2	GLIPR1	BZW2	SIRPG	ELMO2	AHNAK	PGGHG	SFXN3	ABHD3
Central_memory_CD8_T_cell	ACTN4	ADCY9	F13A1	FCER1G	FCGR3B	FGF7	FKBP4	GLUD1	GM2A	GUSB	IL1RN	NTRK1	RARA	SIGLEC1	UBA52	ADAM12	TNFRSF11A	TOX4	NOL11	RNF128	ULBP1
Effector_memory_CD4_T_cell	ATM	CASP3	CASQ1	SIGLEC6	DARS	EZH2	NEFL	PDGFRL	EXOSC9	PTGS1	TAL1	UQCRB	WIPF1	SCG2	NCOA4	USP9Y	CAVIN2	TFEC	DOCK9	TPK1	GDE1	TIPIN	REPS1	ZCRB1	IL34	CD300E	SIGLEC14
Effector_memory_CD8_T_cell	C3AR1	CCR5	CMKLR1	CD55	FLT3LG	GZMM	HLA-DMB	HLA-DPA1	HLA-DPB1	IFI16	LTK	NFKBIA	CFLAR	ACAP1	CD160	DAPP1	TRIB2	LIME1	ATP10D	ARHGAP10	APOL3	SETD7	HAPLN3	SIK1	FCRL6
Eosinophil	DACH1	GPR183	FOSB	GIPR	IL5RA	LRMP	PDE6C	NR4A3	GPR65	DEPDC5	P2RY14	ST3GAL6	RRP12	DAPK2	PKD2L2	KRT18P50	ADGRE3
Gamma_delta_T_cell	ACP5	AQP9	CD33	CD36	CDK5	FABP1	FABP5	IL10RB	LAMC1	LGALS1	LMNB1	MEIS3P1	MPL	MAPK7	RPS7	RPS9	RPS24	CCL13	CCL18	FADD	MINPP1	MFAP3L	BTN3A2	CARD8	DBNL	CD209	KLRF1	KLHL7	C1orf54	KRT80	LCORL
Immature__B_cell	CD22	CYBB	HLA-DQA1	SP100	HDAC9	TXNIP	STAP1	P2RY10	ZCCHC2	FCRL5	HVCN1	FCRLA	FCRL1	FCRL3	TAGAP	FAM129C	NCF1	NCF1B	RUBCN
Immature_dendritic_cell	ACADM	ALDH9A1	ALDH3A2	ALOX15	AMPD2	AMT	ARL1	ATIC	CAPZA1	CLTB	CSF3R	TACSTD2	PLAU	RDX	SLC18A2	ALDH1A2	AHCYL1	INPP5F	RAB38	RRAGD	C1orf162	LILRA5	ATP5F1A
Macrophage	AIF1	CD4	CNR1	CNR2	CRYBB1	EIF4A1	MS4A2	FES	FPR1	FPR2	FZD2	GPR27	HK3	HNMT	HRH1	RNASE2	CCL1	CCL14	CCL23	VNN1	EIF1	IGSF6	CCL26	BASP1	FRAT2	SLC15A3	FRMD4A	NPL	WNT5B	CD300LB	C5AR2	FAM198B	NME8
Mast_cell	CMA1	CPA3	CPM	CTSG	EGR3	FCN1	FTL	HSPA6	ITGA9	PTGS2	RNASE3	S100A4	SLC6A4	ADAMTS3	SIGLEC8	PILRA	ARHGAP15
MDSC	CD2	CD14	CD86	FCGR2A	FCGR2B	FCGR3A	IL4R	ITGAL	ITGAM	PSAP	PTGER2	S100A8	S100A9	CXCR4	IL18BP	GPSM3	PARVG	PTGES2	FERMT3	CCR2
Memory_B_cell	RUNX2	CCNA2	CDKN3	CLCN5	FCER1A	MYC	ENPP1	SORL1	SOX5	STAT5A	STAT5B	TLR9	AICDA	FCRL4
Monocyte	ACTG1	ANXA5	ASGR1	ASGR2	ATP6V1B2	CD1D	CFL1	CTBS	HIVEP2	MBP	MMP15	CFP	TMBIM6	UPK3A	DAZAP2	PQBP1	IKZF1	PNPLA6	TEX264	MARCKSL1	ADGRE4P
Natural_killer_cell	FASLG	AXL	BCL2	BST2	CDC5L	CDH2	CSF2RA	CTSZ	DAXX	DPYD	ERBB3	FCGR1A	FN1	FUCA1	FUT5	GBP3	GRB2	CXCL1	IGFBP5	LST1	FGF18	CYTH1	AKT3	LDB3	FSTL1	KANK2	GLS2	F11R	FZR1	DLL4	CRTAM	FAM49A	DGKH	FAM27C	GAGE2A
Natural_killer_T_cell	CREB1	CSF2	FUT4	HSPA4	ICAM2	ITIH2	KIR2DL1	KIR2DL3	KIR2DS4	KIR3DL1	KIR3DL2	KLRC1	LAMP2	MICB	SDCBP	SPP1	THBD	VCAM1	FOSL1	SLC7A7	IL32	CD101	NCR1	KLRG1	BTN2A2	PDPN	CNPY3	LILRB5	KDM4C	YBX2	CLEC1A	UBASH3A	TREM2	CCDC88A	CRTC3	KIRREL3	NFATC2IP	TSLP	HSPB6	CD109	ISM2	CRTC2	CNPY4	ADGRE1
Neutrophil	CASP5	CDA	FFAR2	HAL	CXCR1	CXCR2	MAK	S100A12	TNFRSF10C	MGAM	CREB5	CHST15	VNN3	MMP25	STEAP4	BTNL8	APOBEC3A	INKA2
Plasmacytoid_dendritic_cell	DAB2	EMP3	ENG	FCAR	GPX1	IDH3A	IGF1	IL3RA	ITGA2B	NUCB2	RALB	SEC14L1	OGT	OFD1	MAGED1	PDIA4	SERTAD2	KLHL21	DDX17	TMED2	GABARAP	CBX6	KRT23	HIGD1A	RNF141	PHRF1	PROK2	ABTB1	RETNLB	SIRPA	CD300LF	MSRB1
Regulatory_T_cell	CD72	ITGA4	L1CAM	LIPA	LRP1	MMP12	MNDA	MRC1	PLEK	PTGIR	CCL3L1	ST8SIA4	MARCO	PRSS23	STAB1	CLEC5A	FOXP3	PELO	MS4A6A	LRRC42
T_follicular_helper_cell	BCL6	CEBPA	CSF1R	CTSS	DPP4	FGF2	LRRC32	GPR18	KIR2DL2	MC5R	CD200	NCAM1	PRDX1	PDCD1	LGMN	TYRO3	RAE1	NRP1	CD84	CDK5R1	CLIC3	CD83	NCR2	PDCD6	CLEC10A	IVNS1ABP	SIGLEC7	B3GAT1	SIGLEC9	CLEC4A	CHST12	PDCD1LG2	RAET1E	MICA	ADA2	SYNM
Type_1_T_helper_cell	ADAM8	ALCAM	BST1	CALD1	CD6	CD7	CD47	CD48	CD53	CD59	CD68	CD70	CD151	CD52	CHRM3	COL4A4	DAB1	EMP1	F12	GATM	GPR25	HSD11B1	HTR2B	ICAM3	IGF2	IL12A	IRF1	ITGB4	LTC4S	MDH1	P2RX5	FURIN	RGS16	RYR1	SELE	SELP	STAC	TNFRSF1A	TRAF1	DOC2B	ENC1	SKAP1	B3GALNT1	FCGR2C	ZEB2	GFPT2	CD96	TRAF3IP2	CFHR3
Type_17_T_helper_cell	ABCA1	ANK1	CA2	CD40	CEACAM3	IL17A	ABCB1	B3GALT2	CCR9	CAMTA1	IL17RA	IL17C	IL23A	IFT80	TNIP2	LONRF3	ADAMTS12	IL17RC	CCDC65	IL17F	ANKRD22	IL17RE	C2CD4A	SH2D6	ILDR1	C2CD4B	PTGDR2
Type_2_T_helper_cell	BIRC5	CDC25C	CENPF	CSRP2	DAPK1	DHFR	DUSP6	GATA3	GNAI1	GSTA4	HELLS	LAIR2	PDE4B	PLA2G4A	RAB27B	EVI5	CDC7	NRP2	DLC1	CXCR6	PHLDA1	LAMP3	RBMS3	ASB2	RNF125	IL26	DNAJC12	TMPRSS3	OSBPL1A
B_Cell	ZNF532	ZNF207	ZNF154	ZCCHC7	XYLT1	WIPF1	WEE1	WDR83OS	WDR34	WDR11	VPS53	VPS28	VPREB3	UVRAG	USP6NL	UROS	UBE2J1	TUBB6	TTC7A	TSPAN9	TSPAN33	TSPAN3	TRIO	TRIM56	TRIM26	TPD52	TNS3	TNFRSF18	TNFRSF17	TMED8	TLR7	TLR10	TFEB	TEAD2	TCL1A	TCF4	TBC1D1	SYPL1	SYNGR2	SYK	SWAP70	SUN2	STX7	STRBP	STAT6	STAP1	STAG3	ST14	SSU72
B_Cell_60gene	SEL1L3	SCFV	POU2AF1	MZB1	MIR8071-2	MIR8071-1	JCHAIN	IGLV1-44	IGLV@	IGLL5	IGLL3P	IGLJ3	IGLC1	IGKV1D-13	IGKC	IGK	IGHV4-31	IGHV3-23	IGHV1-69	IGHM	IGHG4	IGHG3	IGHG2	IGHG1	IGHD	IGHA2	IGHA1	IGH	GUSBP11	CYAT1	CKAP2	CD38
B_Cell_cluster	TNFRSF17	TNFRSF13B	POU2AF1	PAX5	NUGGC	MS4A1	MEI1	JCHAIN	FCRLA	FCRL5	FCRL2	FCRL1	FCER2	FAM30A	CXCR5	CNR2	CD79B	CD79A	CD19	BMS1P20	BLK	BANK1	ADAM6
CD68_cluster	SIGLEC9	SIGLEC7	LRRC25	ITGAX	CD68	C3AR1	ADAP2
CD8	ZBTB16	TSPAN32	TBX21	S100B	PRF1	KLRG1	KLRC1	IL2RB	GZMH	GNLY	FCGBP	DUSP2	CST7	CD8B	CD8A	CCL5	CCL4L1	C1orf21	ADRB2	ADGRG1	?KLRK1
CD8_cluster	ZNF831	ZAP70	UBASH3A	TRAT1	TIGIT	TBX21	TBC1D10C	SLAMF6	SLAMF1	SLA2	SIT1	SIRPG	SH2D1A	SCML4	SAMD3	S1PR4	PYHIN1	PTPRCAP	PTPN7	PRKCB	PRF1	NKG7	LY9	LCK	KLRK1	ITK	IL2RG	GZMK	GZMA	GPR171	CXCR6	CXCR3	CD96	CD8A	CD6	CD5	CD48	CD3G	CD3E	CD3D	CD27	CD247	CD2	CCL5	C16orf54	BTLA	ACAP1
IGG_Cluster	TNFRSF17	POU2AF1	PIM2	NTN3	LAX1	JCHAIN	IL2RG	IGLV3-25	IGL	IGKC	HLA-C	CXCL8	CD79A	CD27
LCK	IL2RG	IL12RG	CCL9	CCL8	CCL7	CCL6	CCL5	CCL28	CCL27	CCL26	CCL25	CCL24	CCL23	CCL22	CCL21	CCL20	CCL19	CCL18	CCL17	CCL16	CCL15	CCL14	CCL13	CCL12	CCL11	CCL10
Mac_CSF1	ZNRF2	ZNF44	ZNF414	ZNF384	ZNF124	ZEB2	ZCCHC2	YWHAZ	YWHAH	YPEL2	XPC	WISP2	WIPF1	WASHC4	VSIG4	VAMP8	USP6NL	USP24	UHMK1	UCP2	UBE2W	UAP1	TYMP	TWISTNB	TTC13	TRPS1	TRAK2	TRAK1	TPR	TPP1	TPM3	TNFSF13B	TNFSF10	TNFRSF21	TNFRSF1B	TNFAIP6	TNFAIP3	TNFAIP2	TMSB4Y	TMSB4X	TMPRSS13	TMEM9B	TMEM37	TMEM273	TMEM206	TMEM106A	TMCC3	TM7SF3	TLR2
MacTh1_cluster	WIPF1	WDFY4	WAS	TNFRSF1B	TNFAIP8L2	TMC8	TLR8	TFEC	TAGAP	SRGN	SPN	SPI1	SNX20	SLCO2B1	SLC7A7	SLA	SIGLEC9	SIGLEC7	SIGLEC10	SELPLG	SCIMP	SASH3	SAMSN1	RNASE6	RASAL3	PTPRC	PTPN22	PLEK	PLCB2	PIK3R5	PIK3CG	PARVG	NCKAP1L	NCF4	MYO1F	MS4A6A	MPEG1	MNDA	LST1	LRRC25	LILRB4	LILRB2	LILRB1	LCP2	LAPTM5	LAIR1	KLHL6	ITGB2	ITGAX
T_Cell	ZAP70	WWP1	WNT10B	VIPR1	UPP1	TXK	TSPAN14	TSEN54	TRERF1	TRB	TRAT1	TRA	TOB1	TNIK	TNFSF8	TNFRSF25	TNFAIP3	TMC6	TIAM1	TESPA1	TESPA1	TCF7	TARP	TACC3	SYT1	SYNE2	STAT4	SPOCK2	SPEG	SORL1	SOCS3	SNPH	SLFN5	SLCO3A1	SLCO3A1	SLC39A8	SLC35D2	SH2D1A	SEMA4D	SEM1	SELPLG	SATB1	S100A8	S100A10	RUNX2	RTKN2	RORA	RNF213	RNF144A
T_Cell_cluster	ZNF831	ZAP70	UBASH3A	TRAT1	TIGIT	TIFAB	THEMIS	TESPA1	TBX21	TBC1D10C	SPOCK2	SP140	SLAMF7	SLAMF6	SLAMF1	SLA2	SIT1	SIRPG	SH2D1A	SCML4	SAMD3	S1PR4	PYHIN1	PTPRCAP	PTPN7	PSTPIP1	PRKCB	PRF1	PLA2G2D	PDCD1	NKG7	MAP4K1	LY9	LTA	LINC00426	LCK	LAX1	LAT	KLRK1	JAK3	ITK	IRF4	IL2RG	ICOS	GZMM	GZMK	GZMA	GVINP1	GPR174
TNBC_B_Cell	IGLL1	IGLJ3	IGLC2	IGL	IGKV1D-13	IGKC	IGHM	IGHG3	IGHG1	IGHD	IGH
TNBC_T_Cell	TRBC1	TRA@	TNFRSF7	SELL	SAMSN1	PTPRC	PLAC8	LCK	LAPTM5	KIAA0053	ITK	IL10RA	GZMK	EVI2B	CORO1A	CD53	CD52	CD48	CD3D	CD2
B_cells_naive	IGKC	IGHM	MS4A1	CD37	CD79A	TCL1A	FCMR	SELL	IL4R	IGHD	LTB	P2RX5	IRF8	CD69	GUSBP11	BANK1	CD19	RUBCNL	LY86	IGLL3P	HLA-DOB	CD79B	RASGRP2	SIK1	RIPOR2	HHEX	BACH2	FCRL2	PNOC	PTPRCAP	SPIB	CCR7	VPREB3	STAP1	FCGR2B	CD22	EAF2	GPR18	BRAF	PIK3IP1	IL2RB	LRMP	ADAM28	TRIB2	ALOX5	RNASE6	BLK	BIRC3	CCL4
B_cells_memory	IGKC	MS4A1	IGHM	LTB	CD37	GUSBP11	CD79A	BANK1	P2RX5	IGLL3P	FCMR	SELL	IRF8	LY86	SIK1	SPIB	CD19	RIPOR2	RUBCNL	RASGRP2	CD69	HLA-DOB	CD79B	AIM2	FCGR2B	PNOC	CD27	PTPRCAP	FCRL2	BLK	LRMP	CD1C	NPIPB15	HHEX	VPREB3	IGHD	ALOX5	SP140	GPR183	CD180	EAF2	STAP1	IL2RB	CCR7	ACP5	IL4R	GPR18	CD22	SIT1
Plasma_cells	IGLL3P	IGKC	IGHM	GUSBP11	IGHD	MZB1	CD38	TNFRSF17	NA	CD27	SIK1	EAF2	IGHE	HLA-DOB	MAN1A1	CD79A	SPAG4	RASGRP3	PNOC	AMPD1	FOSB	FCGR2B	P2RX5	RNASE6	QPCT	CHST15	GNG7	C11orf80	ST6GALNAC4	APOBEC3G	CD19	CCR2	AIM2	PDK1	NPIPB15	TNFRSF13B	KCNA3	CD3E	RPL3P7	CD180	ACP5	LRMP	LIME1	SLAMF1	SP140
T_cells_CD8	IL7R	CD3D	TRAC	CCL5	CD8A	LTB	TRBC1	KLRB1	GZMK	LCK	NKG7	GZMH	KLRK1	CD2	PRF1	SELL	ITK	GZMA	CD3E	FCMR	CD247	CD27	PIK3IP1	CST7	CCR7	CTSW	CD37	PTPRCAP	BCL11B	DUSP2	IL2RB	PVRIG	KLRG1	CD69	GNLY	CD8B	RIPOR2	CD3G	SPOCK2	ZAP70	ZFP36L2	LAT	TCF7	IGKC	TRDC	CCL4	RASGRP2	SKAP1	PTGER2
T_cells_CD4_naive	IL7R	CD3D	TRAC	LTB	TRBC1	SELL	ITK	LCK	FCMR	CCR7	CD2	BCL11B	CD247	LAT	PGGHG	TCF7	PIK3IP1	RPL3P7	RIPOR2	CD69	ZAP70	CD27	RASGRP2	CD3E	DGKA	CD37	CD3G	LEF1	SKAP1	PVRIG	CD4	FLT3LG	MAP4K1	TRAT1	TRIB2	UBASH3A	IL4R	SPOCK2	CD7	PTPRCAP	ANKRD55	LY9	ACAP1	CLEC2D	CD96	BACH2	GZMK	SIT1	TXK
T_cells_CD4_memory_resting	IL7R	TRAC	CD3D	LTB	TRBC1	KLRB1	CD2	LCK	ITK	SELL	CD3E	CD69	CD247	FCMR	BCL11B	PTPRCAP	PIK3IP1	CD37	PTGER2	CD27	GZMA	ZFP36L2	GZMK	CD4	RPL3P7	LAT	SPOCK2	TCF7	PBXIP1	CD6	CCL5	CD3G	GPR183	IL2RB	RASGRP2	RIPOR2	CCR7	DGKA	ZAP70	TRAT1	SKAP1	TRIB2	APOBEC3G	PASK	PRF1	DUSP2	KLRG1	ETS1	PVRIG
T_cells_CD4_memory_activated	GZMB	CCL4	TRAC	CD2	IL2RB	CD3D	IL9	IFNG	LTB	IL2RA	LCK	ITK	AIM2	TRBC1	BIRC3	CCR7	LTA	SAMSN1	CD3E	CD6	GPR171	SELL	CCND2	DUSP2	CD28	GPR183	CD247	EGR2	SLAMF1	TNFRSF4	IL7R	CLEC2D	CTLA4	CCL5	ICOS	CD4	IL3	TRAT1	CCL20	APOBEC3G	PTPRCAP	SH2D1A	LAT	RGS1	PRF1	CSF2	CD7	ETS1	MAP4K1
T_cells_follicular_helper	TRAC	CD3D	TRBC1	CD2	LTB	LCK	CXCL13	ITK	LAT	ICOS	PASK	FCMR	ZAP70	IL2RB	CD69	TRIB2	FOSB	CD27	PTPRCAP	CD247	SIK1	CHI3L2	TCF7	KLRB1	CD4	MAP4K1	SELL	PVRIG	DGKA	CD37	BCL11B	SPOCK2	SIRPG	IL7R	CD3E	SH2D1A	ST8SIA1	P2RX5	PDCD1	CXCR5	ICA1	CD3G	SKAP1	PIK3IP1	DUSP2	RPL3P7	CD7	IGHM	CTLA4
T_cells_regulatory__Tregs	TRBC1	TRAC	LTB	CD3D	IL2RB	CD2	CD247	PMCH	CD7	ITK	CD27	GPR171	LCK	CCR7	SKAP1	CD4	CD3E	SELL	CD37	PIK3IP1	FCMR	SPOCK2	SIT1	CTLA4	IL2RA	CD5	PTPRCAP	IFI44L	LAT	IL4R	PBXIP1	LAIR2	DGKA	ZFP36L2	CD96	TNFRSF4	CLEC2D	TRAV21	BCL11B	PTGER2	PVRIG	BIRC3	SIRPG	CD6	SH2D1A	MAP4K1	FOXP3	CD70	ACAP1
T_cells_gamma_delta	CCL5	TRDC	GZMK	PRF1	GZMA	KLRB1	CST7	CD3D	IL2RB	SELL	GZMH	NKG7	CD247	CCL4	GNLY	GZMB	CD2	ITK	APOBEC3G	TRBC1	KLRK1	FCN1	KLRF1	GPR171	KLRG1	DUSP2	CD69	IL18RAP	LCK	CTSW	PVRIG	KLRD1	LTB	CD160	TRAC	CD96	PTGER2	SKAP1	LAT	BCL11B	GPR65	CCR5	ADRB2	RIPOR2	S100A12	CD27	CD300A	MNDA	MS4A6A
NK_cells_resting	PRF1	GNLY	IL2RB	CCL5	CD247	GZMB	NKG7	GZMA	KLRB1	GZMH	CST7	CCL4	TRDC	KLRF1	KLRK1	KLRD1	CTSW	APOBEC3G	CD2	IL18RAP	SELL	CD300A	ZAP70	PVRIG	TRBC1	TBX21	GZMM	LCK	PTPRCAP	DEFA4	ITK	PTGER2	TTC38	FCMR	CD160	GPR65	CD37	SKAP1	GZMK	ADRB2	CD244	CD69	LAT	KLRG1	CD7	CAMP	CD96	PTGDR	IRF8
NK_cells_activated	CCL4	PRF1	GNLY	GZMB	GZMA	IL2RB	LTB	CD247	NKG7	CCL5	TRDC	CTSW	CST7	APOBEC3G	GZMH	KLRD1	CCND2	KLRF1	PTGER2	IL18RAP	KLRB1	CD69	KLRK1	CD300A	PVRIG	ITK	IFNG	TBX21	PTPRCAP	NCR3	CD2	KIR2DS4	LTA	SAMSN1	TRBC1	LCK	GZMM	IRF8	ADRB2	FASLG	GPR65	CD96	CD7	TNFSF14	PTGDR	GPR18	TXK	ZAP70	CD244
Monocytes	FCN1	NCF2	MNDA	S100A12	FPR1	MS4A6A	AIF1	HCK	SELL	CLEC7A	LST1	LY86	TLR2	CD37	C5AR1	RNASE6	CFP	RNASE2	FOSB	LILRB2	CD4	CHST15	VNN2	HK3	CCL4	CCR2	CLEC4A	P2RY13	CD1D	IGSF6	IRF8	RIPOR2	APOBEC3A	CSF3R	BCL2A1	CD300A	AQP9	ALOX5	HHEX	ADGRE1	TREM1	LILRA2	SLC15A3	BST1	TLR8	NFE2	QPCT	CD33	ASGR2
Macrophages_M0	MMP9	NCF2	ACP5	PLA2G7	CYP27A1	CHI3L1	IGSF6	BCL2A1	BHLHE41	CXCL5	IL7R	C5AR1	AQP9	SLC15A3	ADAMDEC1	EGR2	CLEC7A	PPBP	HK3	HCK	DCSTAMP	KYNU	FPR3	CCL18	QPCT	MNDA	CCL22	RNASE6	SLAMF8	MARCO	CCR5	LST1	TREM2	CCL4	IRF8	AIF1	LY86	CD68	NPL	CXCL3	CD37	CHST15	C1orf54	FCN1	IL1B	COL8A2	CYP27B1	GPC4	CD40
Macrophages_M1	CXCL9	CCL19	CXCL10	IDO1	EBI3	TNFAIP6	CCR7	LAMP3	CCL5	CD40	IRF8	CD38	CCL4	APOL3	CXCL11	ADAMDEC1	HCK	BCL2A1	RSAD2	CYP27B1	KYNU	SIGLEC1	SLAMF1	SLC2A6	IFI44L	SAMSN1	LILRB2	TLR2	CCL8	APOBEC3A	AQP9	C3AR1	HLA-DQA1	MNDA	IL2RA	SLC15A3	CD80	ADGRE1	CHI3L1	RASSF4	IL4R	AIM2	PLA1A	MMP9	TLR8	HESX1	SOCS1	LST1	NOD2
Macrophages_M2	MMP9	MS4A6A	CCL18	AIF1	NCF2	CD4	ACP5	CLEC4A	CCL13	LY86	SLC15A3	CLEC10A	CCL23	HLA-DQA1	RNASE6	ADAMDEC1	HCK	NPL	TREM2	IRF8	SIGLEC1	CCL4	SAMSN1	CLEC7A	TLR2	P2RY13	CCL8	CD86	CD180	CD68	CD209	C3AR1	GPR183	CCL14	DPEP2	FPR3	CD37	LST1	CLIC2	HRH1	EGR2	CHI3L1	C1orf54	CFP	C5AR1	MNDA	PTGER2	CD300A	PIK3IP1
Dendritic_cells_resting	MMP12	CD1B	CD1A	ACP5	NCF2	CD1C	CD1E	RNASE6	HLA-DQA1	TREM2	FPR3	PLA2G7	CLEC7A	CLEC10A	C1orf54	MNDA	EGR2	HCK	CLEC4A	CCL22	MS4A6A	CCL13	LST1	SLC15A3	IGSF6	AIF1	MMP9	ALOX15	SLAMF8	CCL17	CD209	FLVCR2	CLIC2	FCER1A	IL7R	CCL4	SAMSN1	NPL	LY86	KYNU	CD86	CCL18	IRF8	CD40	QPCT	FCGR2B	CCR5	CST7	CD4
Dendritic_cells_activated	CCL22	LAMP3	IDO1	CCR7	CXCL10	BIRC3	TNFAIP6	IL7R	RSAD2	SAMSN1	KYNU	CCL5	EBI3	HLA-DQA1	CCL17	BCL2A1	CCL13	CLIC2	PLA2G7	CD40	SLC15A3	CD80	CD86	CCL4	FPR3	CST7	IFI44L	ACP5	CXCL11	MMP12	HCK	RGS1	CD38	NCF2	CHST7	CCL19	ARHGAP22	CXCL9	MMP9	IRF8	IL1B	SIGLEC1	APOBEC3A	RASSF4	IL4R	IL12B	CD1B	CYP27B1	IL2RA
Mast_cells_resting	CPA3	TPSAB1	HPGDS	PRG2	HDC	SAMSN1	CTSG	ADRB2	C3AR1	ELANE	FCER1A	MS4A2	MYB	CLC	LAT	STAP1	IL1B	IL4R	RGS13	P2RX1	BMP2K	CEACAM8	CST7	P2RY14	MNDA	RNASE2	MS4A3	TRIB2	AIF1	ATP8B4	2020-03-03	GPR65	IL18R1	CMA1	ITK	HHEX	KLRG1	LST1	MMP9	LTC4S	CCL4	CHST15	GFI1	PLA2G7	S100A12
Mast_cells_activated	CCL4	TPSAB1	CPA3	PRG2	IL1B	HPGDS	MMP9	HDC	CXCL3	GZMB	CTSG	CCL20	MYB	C3AR1	IL4R	ELANE	SAMSN1	FCER1A	RGS13	BCL2A1	CLC	IL1A	ADRB2	MMP12	2020-03-03	MS4A2	CST7	LAT	BMP2K	TNFAIP6	RNASE2	IL18R1	P2RX1	STAP1	ATP8B4	BIRC3	EGR2	AQP9	CEACAM8	CSF2	AIF1	LST1	CMA1	NCF2	FCGR2B	TLR2	ADAMDEC1	ADGRE2	GPR65
Eosinophils	CLC	NCF2	ADGRE1	BCL2A1	SAMSN1	P2RY14	C3AR1	GPR65	FOSB	CCR3	CCL4	RNASE2	CD69	LRMP	RGS1	ZNF165	GPR183	ADGRE3	ADGRG3	LST1	DPEP2	NR4A3	ADGRE2	FPR1	HCK	MYB	MNDA	SELL	RIPOR2	C5AR1	FCER1A	CD244	CD300A	SIK1	LTB	IL1A	ADRB2	CD37	P2RY10	IL18RAP	SMPD3	OSM	RGS13	BIRC3	ST3GAL6	MXD1	RASGRP2	IL18R1	ALOX5
Neutrophils	FPR1	FCGR3B	MNDA	VNN2	CXCR2	NCF2	SELL	AQP9	C5AR1	LST1	CSF3R	BCL2A1	S100A12	TREM1	RIPOR2	HCK	MMP9	AIF1	CXCR1	APOBEC3A	LTB	TLR2	FCN1	CLEC7A	MGAM	P2RY13	CLC	CHST15	DPEP2	MMP25	IGSF6	CD300A	FFAR2	ADGRE2	TNFRSF10C	FPR2	CHI3L1	CDA	TNFAIP6	HSPA6	QPCT	LRMP	CD37	HAL	IL1B	ADGRE3	NFE2	ALOX5	LILRB2
B_cells_ImSig	AFF3	BANK1	BLK	BTLA	CCR6	CD180	CD19	CD22	CD37	CD72	CD79A	CD79B	CR2	EBF1	FAM129C	FCRL1	FCRL2	FCRL3	FCRL5	FCRLA	HLA-DOB	IGHV5-78	KIAA0125	LINC00926	LOC100507616	LY9	MS4A1	P2RX5	PAX5	PNOC	POU2F2	S1PR4	SNX22	STAP1	TCL1A	TLR10	VPREB3
T_cells_ImSig	AMICA1	APBB1IP	ARHGAP15	ARHGAP25	ARHGAP9	BIN2	BTK	C1orf162	CCL19	CCR7	CD2	CD27	CD28	CD3D	CD3E	CD3G	CD48	CD52	CD6	CD8A	CD96	CORO1A	CRTAM	CXCL9	CXCR6	CYTIP	DOCK10	DOCK2	DOCK8	DPEP2	EVI2A	EVI2B	FAM26F	FLI1	FYB	FYN	GAB3	GIMAP2	GIMAP4	GIMAP5	GIMAP6	GIMAP7	GMFG	GPR171	GPR18	GZMK	HCST	HMHA1	HVCN1
Macrophages_ImSig	ADAMDEC1	ADORA3	AOAH	ARRB2	ATP8B4	BCL2A1	C1orf54	C1QA	C1QB	C2	C3AR1	C5AR1	CCR1	CCRL2	CD163	CD300A	CD4	CD68	CD74	CD86	CECR1	CLEC7A	CMKLR1	CSF1R	CTSB	CTSS	CYBB	CYTH4	DPYD	EMR2	FCER1G	FCGR1A	FCGR1B	FCGR2A	FCGR3B	FPR3	GPNMB	HK3	HLA-DRB6	IFI30	IGSF6	ITGAM	ITGAX	ITGB2	LAIR1	LAPTM5	LILRB4	LIPA	LY96
Monocytes_ImSig	AGTRAP	AIF1	C10orf54	CD14	CD300LF	CD33	CD93	CTSD	EMILIN2	FCN1	FES	FGR	GNS	GRN	HCK	HMOX1	KIAA0930	LILRA6	LILRB2	LILRB3	LRRC25	LST1	NFAM1	NOTCH2	PILRA	PLXDC2	PRAM1	PSAP	PYCARD	RHOG	SERPINA1	SLC7A7	TGFBI	THEMIS2	TIMP2	TPP1	VCAN
Neutrophils_ImSig	ACSL1	ALPK1	AQP9	BASP1	BCL6	CD97	CEP19	CFLAR	CSF3R	CXCR2	DENND5A	DYSF	FAM65B	FCGR2C	FPR1	GLT1D1	GPR97	IFITM2	IL17RA	KCNJ2	KIAA0247	LILRA2	LIMK2	LINC01002	MGAM	MOB3A	NAMPT	NCF4	PADI2	PHC2	PHF21A	PLXNC1	PREX1	RALB	RNF149	S100A8	S100A9	SLC25A37	SNORD89	SSH2	STAT3	STAT5B	THBD	TLR2	TLR4	TMEM154	TNFRSF1A
NK_cells_ImSig	KIR2DL1	KIR2DL2	KIR2DL3	KIR2DL4	KIR2DL5A	KIR2DS1	KIR2DS2	KIR2DS3	KIR2DS5	KIR3DL1	KIR3DL2	KIR3DL3	KLRC2	KLRC3	KLRC4	KLRD1	PRF1	SAMD3	SH2D1B	TBX21
Plasma_cells_ImSig	GUSBP11	IGH	IGHG3	IGJ	IGKC	IGKV1D-13	IGLC1	IGLJ3	IGLL3P	IGLV@	IGLV1-44	MZB1	TNFRSF17	TXNDC5
Interferon_ImSig	APOL1	APOL6	BATF2	BST2	C19orf66	C5orf56	CMPK2	DDX58	DDX60	DHX58	DTX3L	EPSTI1	FBXO6	GBP1	GBP4	HELZ2	HERC5	HERC6	HSH2D	IFI16	IFI35	IFI44	IFI44L	IFI6	IFIH1	IFIT1	IFIT2	IFIT3	IFIT5	IFITM1	IRF7	IRF9	ISG15	LAMP3	LAP3	MX1	MX2	OAS2	OAS3	OASL	PARP10	PARP12	PARP14	PARP9	PHF11	PML	PSMB9	RNF213	RSAD2
Proliferation_ImSig	ANLN	ASPM	AURKA	AURKB	BIRC5	BUB1	BUB1B	CASC5	CCNA2	CCNB1	CCNB2	CCNE2	CDC20	CDC6	CDCA2	CDCA3	CDCA5	CDCA7	CDCA8	CDK1	CDKN3	CDT1	CENPA	CENPE	CENPF	CENPL	CEP55	CKS1B	DEPDC1	DEPDC1B	DLGAP5	DONSON	DTL	E2F8	ECT2	EZH2	FAM72C	FANCI	FBXO5	FOXM1	GINS1	GINS2	GMNN	HJURP	HMGB3	HMMR	KIAA0101	KIF11	KIF14
Translation_ImSig	EEF1A1	EEF1B2	EEF1D	EEF1G	EIF3D	EIF3E	EIF3F	EIF3G	EIF3H	EIF3K	FAU	GNB2L1	NACA	PFDN5	RPL10	RPL10L	RPL11	RPL12	RPL13	RPL13A	RPL14	RPL15	RPL17	RPL18	RPL18A	RPL19	RPL21	RPL22	RPL23	RPL23A	RPL24	RPL27	RPL27A	RPL28	RPL29	RPL3	RPL30	RPL31	RPL32	RPL34	RPL35	RPL35A	RPL36A	RPL37	RPL37A	RPL38	RPL39	RPL4	RPL5
Antigen_Processing_and_Presentation	AZGP1	B2M	CALR	CANX	CD1A	CD1B	CD1C	CD1D	CD1E	CD4	CD8A	CD8B	CD74	CREB1	CTSB	CTSE	CTSL1	CTSS	FCER1G	FCGRT	PDIA3	HFE	HLA-A	HLA-B	HLA-C	HLA-DMA	HLA-DMB	HLA-DOA	HLA-DOB	HLA-DPA1	HLA-DPB1	HLA-DQA1	HLA-DQA2	HLA-DQB1	HLA-DRA	HLA-DRB1	HLA-DRB3	HLA-DRB4	HLA-DRB5	HLA-E	HLA-F	HLA-G	HLA-H	MR1	HSPA1A	HSPA1B	HSPA1L	HSPA2	HSPA4
Antimicrobials	HAMP	PI3	CAMP	DEFB4	PPBP	REG3G	CXCL14	CXCL16	SLPI	IL8	CXCL10	CXCL9	CXCL5	CXCL11	CXCL6	CXCL1	CXCL12	CXCL13	CXCL2	PF4	XCL1	CXCL3	DEFB103A	CCL13	CCL1	DEFB1	CCL8	ELANE	DEFB103B	DEFA3	DEFA1	TMSB10	DEFA6	DEFA5	DEFA4	LCN2	LCN1	COLEC10	BPI	S100A9	S100A8	DCD	LCN6	S100A12	HTN3	LCN8	LOC728358	CCR10	CELA1
BCRSignalingPathway	CD79A	CD79B	LYN	SYK	BTK	BLNK	VAV3	VAV1	VAV2	RAC1	RAC2	RAC3	PPP3CA	PPP3CB	PPP3CC	CHP	PPP3R1	PPP3R2	CHP2	NFAT5	NFATC1	NFATC2	NFATC3	NFATC4	HRAS	KRAS	NRAS	FOS	JUN	CARD11	BCL10	MALT1	CHUK	IKBKB	IKBKG	NFKB1	RELA	NFKBIA	NFKBIB	NFKBIE	CD81	CD19	CR2	PIK3R5	PIK3R1	PIK3R2	PIK3R3	PIK3CA	PIK3CB
Chemokines	C3	C5	CAMP	CCL1	CCL11	CCL13	CCL14	CCL14-CCL15	CCL15	CCL16	CCL17	CCL18	CCL19	CCL2	CCL20	CCL21	CCL22	CCL23	CCL24	CCL25	CCL26	CCL27	CCL28	CCL3	CCL3L1	CCL3L2	CCL3L3	CCL4	CCL4L1	CCL4L2	CCL5	CCL7	CCL8	CKLF	CMA1	CTSG	CX3CL1	CXCL1	CXCL10	CXCL11	CXCL12	CXCL13	CXCL14	CXCL16	CXCL17	CXCL2	CXCL3	CXCL5	CXCL6
Chemokine_Receptors	C5AR1	CCBP2	CCR1	CCR10	CCR3	CCR4	CCR5	CCR6	CCR7	CCR8	CCR9	CCRL1	CCRL2	CMKLR1	CX3CR1	CXCR3	CXCR4	CXCR5	CXCR6	CXCR7	CYSLTR1	CYSLTR2	DARC	EDNRA	EDNRB	FPR1	FPR2	FPR2	GPR17	GPR32	GPR33	GPR44	GPR77	IL8RA	IL8RB	LTB4R	LTB4R2	PLAUR	PLXNA1	PLXNA2	PLXNA3	PLXNA4	PLXNB1	PLXNB2	PLXNB3	PLXNC1	PLXND1	PTAFR	ROBO1
Cytokines	ADIPOQ	ADM	ADM2	AGRP	AGT	AMBN	AMELX	AMH	ANGPTL5	ANGPTL7	APLN	AREG	ARMET	ARMETL1	ARTN	AVP	AZU1	BDNF	BMP1	BMP10	BMP15	BMP2	BMP3	BMP4	BMP5	BMP6	BMP7	BMP8A	BMP8B	BTC	C19orf10	C3	C5	CALCA	CALCB	CAMP	CAT	CCK	CCL1	CCL11	CCL13	CCL14	CCL14-CCL15	CCL15	CCL16	CCL17	CCL18	CCL19	CCL2
Cytokine_Receptors	ACVR1B	ACVR1C	ACVR2A	ACVR2B	ACVRL1	ADCYAP1R1	ADIPOR1	ADIPOR2	ADRB1	ADRB2	AGTR1	AGTR2	AMHR2	ANGPT1	ANGPT4	ANGPTL1	ANGPTL2	ANGPTL3	ANGPTL4	ANGPTL6	APLNR	AR	AVPR1A	AVPR1B	AVPR2	BMPR1A	BMPR1B	BMPR2	BRD8	C3AR1	C5AR1	CALCR	CALCRL	CCBP2	CCR1	CCR10	CCR3	CCR4	CCR5	CCR6	CCR7	CCR8	CCR9	CCRL1	CCRL2	CD40	CMKLR1	CNTFR	CRHR1
Interferons	IFNA10	IFNA13	IFNA14	IFNA16	IFNA17	IFNA2	IFNA21	IFNA4	IFNA5	IFNA6	IFNA7	IFNA8	IFNB1	IFNE	IFNG	IFNK	IFNW1
Interferon_Receptor	IFNAR2	IFNGR1	IFNGR2
Interleukins	IL11	IL12A	IL12B	IL13	IL15	IL16	IL17A	IL17B	IL17C	IL17D	IL17F	IL18	IL19	IL1A	IL1B	IL1F10	IL1F5	IL1F6	IL1F7	IL1F8	IL1F9	IL1RN	IL2	IL20	IL21	IL22	IL23A	IL24	IL25	IL26	IL27	IL28A	IL28B	IL29	IL3	IL31	IL32	IL33	IL34	IL4	IL5	IL6	IL6ST	IL7	IL8	IL9	TXLNA
Interleukins_Receptor	IL10RA	IL10RB	IL11RA	IL11RB	IL12RB1	IL12RB2	IL13RA1	IL13RA2	IL15RA	IL15RB	IL17RA	IL17RB	IL17RC	IL17RD	IL17RE	IL18R1	IL18RAP	IL1R1	IL1R2	IL1RAP	IL1RL1	IL1RL2	IL20RA	IL20RB	IL21R	IL22RA1	IL22RA2	IL23R	IL27RA	IL28RA	IL2RA	IL2RB	IL2RG	IL31RA	IL3RA	IL4R	IL5RA	IL6R	IL7R	IL8RA	IL8RB	IL9R	ST2
NaturalKiller_Cell_Cytotoxicity	HLA-A	HLA-B	HLA-C	HLA-E	HLA-G	KIR3DL1	KIR3DL2	KIR2DL1	KIR2DL2	KIR2DL3	KIR2DL4	KIR2DL5A	KLRC1	KLRC2	KLRC3	KLRD1	PTPN6	PTPN11	ICAM1	ICAM2	ITGAL	ITGB2	PTK2B	VAV3	VAV1	VAV2	RAC1	RAC2	RAC3	PAK1	MAP2K1	MAP2K2	MAPK1	MAPK3	TNF	CSF2	IFNG	KIR2DS1	KIR2DS3	KIR2DS4	KIR2DS5	NCR2	TYROBP	LCK	FCGR3A	FCGR3B	LOC652578	NCR1	NCR3
TCRsignalingPathway	CD3D	CD3E	CD3G	CD247	CD4	CD8A	CD8B	PTPRC	LCK	FYN	ZAP70	LCP2	LAT	ITK	TEC	NCK1	NCK2	VAV3	VAV1	VAV2	GRAP2	GRB2	PAK1	PAK2	PAK3	PAK4	PAK6	PAK7	RHOA	CDC42	PPP3CA	PPP3CB	PPP3CC	CHP	PPP3R1	PPP3R2	CHP2	NFAT5	NFATC1	NFATC2	NFATC3	NFATC4	SOS1	SOS2	HRAS	KRAS	NRAS	FOS	JUN
TGFb_Family_Member	BMP1	BMP10	BMP15	BMP2	BMP3	BMP4	BMP5	BMP6	BMP7	BMP8A	BMP8B	GDF1	GDF10	GDF11	GDF15	GDF2	GDF3	GDF5	GDF6	GDF7	GDF9	GDNF	INHA	INHBA	INHBB	INHBC	INHBE	LEFTY1	LEFTY2	NODAL	TGFB1	TGFB2	TGFB3
TGFb_Family_Member_Receptor	ACVR1B	ACVR1C	ACVR2A	ACVR2B	ACVRL1	AMHR2	BMPR1A	BMPR1B	BMPR2	TGFBR1	TGFBR2	TGFBR3
TNF_Family_Members	TNFRSF11B	TNFSF10	TNFSF11	TNFSF12	TNFSF13	TNFSF13B	TNFSF14	TNFSF15	TNFSF18	TNFSF4	TNFSF8	TNFSF9
TNF_Family_Members_Receptors	TNFRSF10B	TNFRSF10C	TNFRSF10D	TNFRSF11A	TNFRSF12A	TNFRSF13B	TNFRSF13C	TNFRSF14	TNFRSF17	TNFRSF18	TNFRSF19	TNFRSF1A	TNFRSF1B	TNFRSF21	TNFRSF25	TNFRSF4	TNFRSF6B	TNFRSF8	TNFRSF9
T_cells_MCPcounter	CD28	CD3D	CD3G	CD5	CD6	CHRM3-AS2	CTLA4	FLT3LG	ICOS	MAL	MGC40069	PBX4	SIRPG	THEMIS	TNFRSF25	TRAT1
CD8_T_cells_MCPcounter	CD8B
Cytotoxic_lymphocytes_MCPcounter	CD8A	EOMES	FGFBP2	GNLY	KLRC3	KLRC4	KLRD1
B_lineage_MCPcounter	BANK1	CD19	CD22	CD79A	CR2	FCRL2	IGKC	MS4A1	PAX5
NK_cells_MCPcounter	CD160	KIR2DL1	KIR2DL3	KIR2DL4	KIR3DL1	KIR3DS1	NCR1	PTGDR	SH2D1B
Monocytic_lineage_MCPcounter	ADAP2	CSF1R	FPR3	KYNU	PLA2G7	RASSF4	TFEC
Myeloid_dendritic_cells_MCPcounter	CD1A	CD1B	CD1E	CLEC10A	CLIC2	WFDC21P
Neutrophils_MCPcounter	CA4	CEACAM3	CXCR1	CXCR2	CYP4F3	FCGR3B	HAL	KCNJ15	MEGF9	SLC25A37	STEAP4	TECPR2	TLE3	TNFRSF10C	VNN3
Endothelial_cells_MCPcounter	ACVRL1	APLN	BCL6B	BMP6	BMX	CDH5	CLEC14A	CXorf36	EDN1	ELTD1	EMCN	ESAM	ESM1	FAM124B	HECW2	HHIP	KDR	MMRN1	MMRN2	MYCT1	PALMD	PEAR1	PGF	PLXNA2	PTPRB	ROBO4	SDPR	SHANK3	SHE	TEK	TIE1	VEPH1	VWF
Fibroblasts_MCPcounter	COL1A1	COL3A1	COL6A1	COL6A2	DCN	GREM1	PAMR1	TAGLN
T_cell_infiltration_1	CD8A	CCL2	CCL3	CCL4	CXCL9	CXCL10	ICOS	GZMK	IRF1	HLA-DMA	HLA-DMB	HLA-DOA	HLA-DOB
T_cell_infiltration_2	CD8B	CCL4	CCL5	CXCL9	XCL2	CXCL10	CXCL11	CXCL13	CCL2	CCL19	CCL21
[truncated: 817 more columns]

## Sheet: Second portion
Second portion: 119 TME associated signatures obtained from R package IOBR and their contained genes
CD_8_T_effector	CD8A	GZMA	GZMB	IFNG	CXCL9	CXCL10	PRF1	TBX21
DDR	UNG	SMUG1	MBD4	OGG1	MUTYH	NTHL1	MPG	NEIL1	NEIL2	NEIL3	APEX1	APEX2	LIG3	XRCC1	PNKP	APLF	PARP1	PARP2	PARP3	MGMT	ALKBH2	ALKBH3	TDP1	TDP2	MSH2	MSH3	MSH6	MLH1	PMS2	MSH4	MSH5	MLH3	PMS1	XPC	RAD23B	CETN2	RAD23A	XPA	DDB1	DDB2	RPA1	RPA2	RPA3	ERCC3	ERCC2	GTF2H1	GTF2H2	GTF2H3	GTF2H4
APM	B2M	HLA-A	HLA-B	HLA-C	TAP1	TAP2
Immune_Checkpoint	CD274	PDCD1LG2	CTLA4	PDCD1	LAG3	HAVCR2	TIGIT
CellCycle_Reg	ATM	CDKN1A	CDKN2A	MDM2	TP53	CCND1	RB1	CCNE1	FBXW7	E2F3
Pan_F_TBRs	ACTA2	ACTG2	ADAM12	ADAM19	CNN1	COL4A1	CTGF	CTPS1	FAM101B	FSTL3	HSPB1	IGFBP3	PXDC1	SEMA7A	SH3PXD2A	TAGLN	TGFBI	TNS1	TPM1
Histones	HIST1H2AI	HIST1H2AG	HIST1H2BL	HIST2H2BF
EMT1	CLDN3	CLDN7	CLDN4	CDH1	VIM	TWIST1	ZEB1	ZEB2
EMT2	AXL	ROR2	WNT5A	LOXL2	TWIST2	TAGLN	FAP
EMT3	SOX9	TWIST1	FOXF1	ZEB1	ZEB2	GATA6
WNT_target	EFNB3	MYC	TCF12	VEGFA
FGFR3_related	FGFR3	TP63	WNT7B
Cell_cycle	CDK2	CDK4	CDK6	CDK7	CDKN1A	CDKN1B	STAG1	CDKN1C	CDKN2A	CDKN2B	CDKN2C	CDKN2D	ANAPC10	MAD2L2	STAG2	PTTG2	GADD45G	DBF4	YWHAQ	CHEK1	CHEK2	CREBBP	GADD45A	E2F1	E2F2	E2F3	E2F4	E2F5	EP300	ORC6	ORC3	CDC26	ABL1	ANAPC13	SMC1B	SFN	GSK3B	ANAPC2	ANAPC4	HDAC1	HDAC2	MAD2L1	SMAD2	SMAD3	SMAD4	MCM2	MCM3	MCM4	MCM5
Mismatch_Repair	POLD3	MLH3	MSH6	RPA4	LIG1	MLH1	MSH2	MSH3	PCNA	PMS2	POLD1	POLD2	POLD4	RFC1	RFC2	RFC3	RFC4	RFC5	RPA1	RPA2	RPA3	SSBP1	EXO1
Homologous_recombination	RAD50	POLD3	EME1	RAD54B	RPA4	MRE11A	NBN	POLD1	POLD2	POLD4	RAD51	RAD51C	RAD51B	RAD51D	RAD52	RPA1	RPA2	RPA3	BLM	SSBP1	BRCA2	TOP3A	XRCC2	XRCC3	SHFM1	MUS81	RAD54L	TOP3B
Nucleotide_excision_repair	CDK7	CETN2	POLD3	ERCC8	DDB1	DDB2	ERCC1	ERCC2	ERCC3	ERCC4	ERCC5	ERCC6	GTF2H1	GTF2H2	GTF2H3	GTF2H4	RPA4	LIG1	GTF2H5	MNAT1	PCNA	POLE3	POLD1	POLD2	POLE	POLE2	POLE4	POLD4	RAD23A	RAD23B	RFC1	RFC2	RFC3	RFC4	RFC5	RPA1	RPA2	RPA3	XPA	XPC	CUL4B	CUL4A	CCNH	RBX1
DNA_replication	RNASEH2A	POLD3	DNA2	FEN1	POLA2	RNASEH1	RPA4	LIG1	MCM2	MCM3	MCM4	MCM5	MCM6	MCM7	PCNA	POLE3	POLA1	POLD1	POLD2	POLE	POLE2	PRIM1	PRIM2	POLE4	POLD4	RFC1	RFC2	RFC3	RFC4	RFC5	RPA1	RPA2	RPA3	SSBP1	RNASEH2B	RNASEH2C
Base_excision_repair	PARP2	PARP3	POLD3	PARP1	PARP4	FEN1	SMUG1	NEIL2	APEX2	POLL	HMGB1	APEX1	LIG1	LIG3	MPG	MUTYH	NTHL1	OGG1	PCNA	POLE3	POLB	POLD1	POLD2	POLE	POLE2	NEIL3	POLE4	POLD4	UNG	XRCC1	NEIL1	MBD4
TMEscoreA_CIR	HLA-DPB1	UBD	LOC100509457	WARS	TAP1	HLA-DMA	TRIM22	PSAT1	CXCL10	SOCS3	CXCL9	PBK	CCL4	CCL5	BCL2A1	TRBC1	IDO1	NFE2L3	CCL3L3	DTL	MMP9	SLC2A3	ZNF367	RCC1	STIL	TRAC	HELLS	GZMB	RTEL1-TNFRSF6B	CXCL11	GBP5	CD2	CDCA2	CDT1	TNFAIP2	TYMP	MICB	SLC2A14	GZMK	CD8A	CENPH	MND1	BATF2	BRIP1	E2F7	KIF18A	AIM2	ETV7	ITK
TMEscoreB_CIR	DCN	SEPP1	ACTA2	SPARCL1	BEX3	MYLK	AKR1C1	TIMP2	MXRA7	C11orf96	CAV1	PDGFRA	FHL1	MGP	EID1	LOC101930400	DST	GREM1	FERMT2	TNC	CYBRD1	LTBP1	ACTG2	TMEM47	SERPINE2	ANTXR2	GNG11	TAGLN	GSTA4	PKIG	MAOA	PTRF	FAM3B	PBX1	WLS	SELM	SVIL	MYH11	AGT	SPON1	TGFB1I1	PDLIM3	PDK4	SYNPO2	MSRB3	PROS1	EDNRA	AKAP12	PSD3
CD8_Rooney_et_al	CD8A	CD8B	GZMA	GZMB	PRF1
B_cells_Rooney_et_al	CD79B	BTLA	FCRL3	BANK1	CD79A	BLK	RALGPS2	FCRL1	HVCN1	BACH2
Treg_Rooney_et_al	FOXP3	C15orf53	IL5	CTLA4	IL32	GPR15	IL4
Macrophages_Rooney_et_al	FUCA1	MMP9	LGMN	HS3ST2	TM4SF19	CLEC5A	GPNMB	C11orf45	CD68	CYBB
Neutrophils_Rooney_et_al	KDM6B	HSD17B11	EVI2B	MNDA	MEGF9	SELL	NLRP12	PADI4	TRANK1	VNN3
NK_cells_Rooney_et_al	KLRF1	KLRC1
pDCs_Rooney_et_al	LILRA4	CLEC4C	PLD4	PHEX	IL3RA	PTCRA	IRF8	IRF7	GZMB	CXCR3
MHC_Class_I_Rooney_et_al	HLA-A	B2M	TAP1
Co_stimulation_APC_Rooney_et_al	ICOSLG	CD70	TNFSF14	CD40	TNFSF9	TNFSF4	TNFSF15	TNFSF18	TNFSF8	SLAMF1	CD58
Co_stimulation_T_cell_Rooney_et_al	ICOS	CD28	CD27	TNFSF14	CD40LG	TNFRSF9	TNFRSF4	TNFRSF25	TNFRSF18	TNFRSF8	SLAMF1	CD2	CD226
Co_inhibition_APC_Rooney_et_al	PDCD1LG2	CD274	C10orf54	LGALS9	PVRL3
Co_inhibition_T_cell_Rooney_et_al	LAG3	CTLA4	CD274	CD160	BTLA	C10orf54	LAIR1	HAVCR2	CD244	TIGIT
Type_I_IFN_Reponse_Rooney_et_al	MX1	TNFSF10	RSAD2	IFIT1	IFIT3	IFIT2	IRF7	DDX4	MX2	ISG20
Type_II_IFN_Reponse_Rooney_et_al	GPR146	SELP	AHR
Cytolytic_Activity_Rooney_et_al	GZMA	PRF1
MHC_Class_I	HLA-A	HLA-B	HLA-C	HLA-E	HLA-F	HLA-G	HLA-H	HLA-J	HLA-K	HLA-L	TAP1	TAP2	LMP2	LMP7
MHC_Class_II	HLA-DRA	HLA-DRB1	HLA-DRB2	HLA-DRB3	HLA-DRB4	HLA-DRB5	HLA-DRB6	HLA-DRB7	HLA-DRB8	HLA-DRB9	HLA-DQA1	HLA-DQA2	HLA-DQB1	HLA-DQB2	HLA-DQB3	HLA-DPA1	HLA-DPA2	HLA-DPB1	HLA-DPB2
T_cell_inflamed_GEP_Ayers_et_al	CD3D	IDO1	CIITA	CD3E	CCL5	GZMK	CXCL10	STAT1	GZMB	IL2RG	NKG7	HLA-E	CXCR6	LAG3	TAGAP	CD2	HLA-DRA	CXCL13
IFNG_signature_Ayers_et_al	IDO1	CXCL10	CXCL9	HLA-DRA	STAT1	IFNG
MDSC_Wang_et_al	CCR2	CXCR4	CXCR2	ITGAM	ITGAX	ANPEP	CD14	FUT4	CD33	CD34	CD38	ENTPD1	PTPRC	CEACAM8	CD80	CSF1R	IL4R	CSF3	CSF2	CXCL8	CCL2	TNF	CXCL12	S100A8	S100A9	STAT1	STAT3	STAT5A	ARG1	NOS2	CD274	TLR3	TLR4	TGFB1	IL10	FOXP3	IDO1	PDCD1
GPAGs	ANG	CXCL12	C3	CX3CR1	CDC42	TGFBR2	CTNNB1	CCR2	CAV1	PTGS2	SRPK2	IL1B	CYR61	KLF4	CASP8	SCG2	EGR3	JUN	TNFSF12	NR4A1	KRIT1	CYSLTR1	FGF10	HHEX	ROCK1	GPX1	EMCN	S1PR1	ECSCR	PLCD3
PPAGs	ADAM15	GPR56	ERBB2	VEGFA	GPI	MYH9	SPHK1	COL4A1	MED1	RBM15	ADAM8	CXCL17	IL18	WNT7B	EPHB3	ROCK2	SHB	ITGA5	COL4A2	ANGPT2	E2F7	ADM2	NAA15	TNFRSF1A	PGF	PLXDC1	TGFBR1
HLA_signature_gene	CD74	HLA-DRA	HLA-DPB1	HLA-DMB	HLA-DPA1	IL12RB1	HLA-DRB1	HLA-DOA	CIITA	HLA-F	IL2RG	PTPN7	PSMB9	SELPLG	GBP5	SASH3	IL2RB	SLA2	HCST	ARHGAP9	PTPRC	CYBB	PRF1	TAGAP	PTPN22	ITGAL	CCL5	CD53	NCKAP1L	MYO1G	CD3E	ITGB2	RASGRP1	CD7	CD247	HAVCR2	DOCK2	PDCD1	SPI1	TRAF3IP3	CD84	CD37	TNFSF13B	UBASH3A	TBX21	IL21R	CD3G	ACAP1	SPOCK2
B_cells_Danaher_et_al	BLK	CD19	MS4A1	TNFRSF17	FCRL2	KIAA0125	PNOC	SPIB	TCL1A
CD8_T_cells_Danaher_et_al	CD8A	CD8B
Cytotoxic_cells_Danaher_et_al	CTSW	GNLY	GZMA	GZMB	GZMH	KLRB1	KLRD1	KLRK1	PRF1	NKG7
DC_Danaher_et_al	CCL13	CD209	HSD11B1
Exhausted_CD8_Danaher_et_al	CD244	EOMES	LAG3	PTGER4
Macrophages_Danaher_et_al	CD163	CD68	CD84	MS4A4A
Mast_cells_Danaher_et_al	MS4A2	TPSAB1	CPA3	HDC	TPSB2
Neutrophils_Danaher_et_al	CSF3R	S100A12	CEACAM3	FCAR	FCGR3B	FPR1	SIGLEC5
NK_CD56dim_cells_Danaher_et_al	IL21R	KIR2DL3	KIR3DL1	KIR3DL2
NK_cells_Danaher_et_al	NCR1	XCL2	XCL1
T_cells_Danaher_et_al	CD3D	CD3E	CD3G	CD6	SH2D1A	TRAT1
TIP_Release_of_cancer_cell_antigens	IL10	TGFB1	HMGB1	ANXA1	CALR	CXCL10	PDIA3	HSPA1A	HSPA1B	HSPA2	HSPA8	HSPA4	HSPA14	HSPA5	HSPA6	HSPA9	HSPA13	HSPA7	HSPA12A	HSPA12B	HSP90AA1	HSP90AB1	HSP90B1	IFNA2	IFNA1	IFNA13	IFNA6	IFNA21	IFNA4	IFNA8	IFNA5	IFNA7	IFNA14	IFNA16	IFNA10	IFNA17	IFNB1	IFNE	IFNW1
TIP_Cancer_antigen_presentation_1	TNF	IL1A	IL1B	IFNA2	IFNA1	IFNA13	IFNA6	IFNA21	IFNA4	IFNA8	IFNA5	IFNA7	IFNA14	IFNA16	IFNA10	IFNA17	CD40LG	CD40	NT5C	HMGB1	TLR1	TLR2	TLR3	TLR4	TLR5	TLR6	TLR7	TLR8	TLR9	TLR10	HLAA	B2M	TAP1	IL10	IL4	IL13
TIP_Cancer_antigen_presentation_2	IL10	IL4	IL13
TIP_Priming_and_activation_1	CD3D	CD3E	CD3G	CD247	CD28	TNFRSF9	TNFSF9	TNFRSF4	TNFSF4	CD27	CD70	TNFRSF14	TNFSF14	CD40	CD40LG	TNFRSF18	TNFSF18	TNFRSF25	TNFSF15	TNFRSF8	TNFSF8	HAVCR1	TIMD4	SLAMF7	SLAMF6	SLAMF1	SLAMF9	SLAMF8	CD2	CD48	CD58	CD226	ICOS	ICOSLG	KLRK1	MICA	MICB	RAET1E	RAET1G	CRTAM	CADM1	CTLA4	PDCD1	PDCD1LG2	CD274	CD160	BTLA	VSIR	LAIR1
TIP_Priming_and_activation_2	CTLA4	PDCD1	PDCD1LG2	CD274	CD160	TNFRSF14	BTLA	VSIR	LAIR1	HAVCR1	HAVCR2	LGALS9	TIMD4	CD244	CD48	TIGIT	NECTIN3	LAG3	IL2	IL12A	IL12B
TIP_Trafficking_of_immune_cells_to_tumors	CXCR5	CXCL13	CCL24	CCL26	CCL19	CX3CL1	CXCL16	CCR5	CXCR3	CXCL10	CXCL9	CCL20	CXCL11	CCR7	CCL3	CCL4	CCL5	CCL21	CCL11	CSF1	CCL2	CXCR2	CXCL5	CCL7	CXCL1	CXCL2	CXCL3	CXCL8	CXCL6	CCR6	CXCL12	CXCR4	CCL1	CCL17	CCL22	CCR4	CCR10	CCL28
TIP_Infiltration_of_immune_cells_into_tumors_1	STAT1	IRF5	KLF2	ITGB2	ICAM1	EZH2	DNMT1	VEGFA	EDNRB
TIP_Infiltration_of_immune_cells_into_tumors_2	ICAM1	EZH2	DNMT1	VEGFA	EDNRB
TIP_Recognition_of_cancer_cells_by_T_cells_1	CD28	ICOS	ICOSLG	TNFRSF9	TNFSF9	CD27	CD70	TNFRSF4	TNFSF4	TNFSF14	CD40	CD40LG	HLAA	B2M	TAP1	BIRC5	MDM2	MAGEA4	TP53	PDCD1	PDCD1LG2	CD274	CTLA4	BTLA	VTCN1
TIP_Recognition_of_cancer_cells_by_T_cells_2	PDCD1	PDCD1LG2	CD274	CTLA4	BTLA	VTCN1
TIP_Killing_of_cancer_cells_1	IFNG	GZMB	PRF1
TIP_Killing_of_cancer_cells_2	PDCD1	SMC3	VTCN1	HAVCR2	MICA	MICB	BTLA	VSIR	LAG3	IDO1	IDO2	ARG1	ARG2	NOS1	NOS2	NOS3	TGFB1	IL10	CCL28	CXCL12	CCL2	CXCL8
TLS_Nature	CD79B	CD1D	CCR6	LAT	SKAP1	CETP	EIF1AY	RBP5	PTGDS
TMEscoreA_plus	CDT1	PSAT1	IDO1	BRIP1	WARS	DTL	GBP5	KIF18A	UBD	GZMB	CCL4	CCL5	RCC1	HELLS	GNLY	TAP1	CD8A	CXCL11	GBP4	ETV7	ZNF367	CXCL10	KLRC2	CXCL9	IFNG
TMEscoreB_plus	MIR100HG	PRICKLE2	PAPLN	PLEKHH2	TNS1	MCC	MAMDC2	C14orf132	SYNPO	PID1	MCEMP1	ZCCHC24	PROS1	JAM3	TGFB1I1	MXRA7	FILIP1	CRYAB	ANTXR2
B_cells_Bindea_et_al	MS4A1	TCL1A	HLA-DOB	PNOC	KIAA0125	CD19	CR2	IGHG1	FCRL2	BLK	COCH	OSBPL10	IGHA1	TNFRSF17	ABCB4	BLNK	GLDC	MEF2C	IGHM	FAM30A	SPIB	BCL11A	GNG7	IGKC	CD72	MICAL3	BACH2	IGLA	CCR9	QRSL1	DTNB	HLA-DQA1	SCN3A	SLC15A2
T_cells_Bindea_et_al	PRKCQ	CD3D	CD3G	CD28	LCK	TRAT1	BCL11B	CD2	TRBC1	TRAA	ITM2A	SH2D1A	CD6	CD96	NCALD	GIMAP5	CD3E	SKAP1
T_helper_cells_Bindea_et_al	ICOS	LRBA	ITM2A	FAM111A	PHF10	NUP107	SEC24C	NAP1L4	BATF	ASF1A	FRYL	FUSIP1	TRAA	RPA1	UBE2L3	ANP32B	DDX50	C13orf34	PPP2R5C	SLC25A12	ATF2	CD28	GOLGA8A
Tcm_Bindea_et_al	CDC14A	ATM	USP9Y	PCNX	FOXP1	KLF12	ST3GAL1	INPP4B	CASP8	MLL	PCM1	RP11-74E24.2	PHC3	NFATC3	LOC202134	TIMM8A	ATF7IP	REPS1	PSPC1	RPP38	HNRPH1	STX16	CYLD	SNRPN	TRAF3IP3	NEFL	POLR2J2	AQP3	CG030	PDXDC2	CLUAP1	DOCK9	CYorf15B	CREBZF	CEP68	TXK	SLC7A6	FYB	MAP3K1
Tem_Bindea_et_al	TRAA	PRKY	VIL2	GDPD5	CCR2	MEFV	C7orf54	FLI1	TBC1D5	DDX17	AKT3	EWSR1	TBCD	NFATC4	LTK
Th1_cells_Bindea_et_al	IFNG	LTA	APBB2	DOK5	IL12RB2	APOD	ZBTB32	CD38	CSF2	CTLA4	CD70	DPP4	EGFL6	BST2	DUSP5	LRP8	IL22	DGKI	CCL4	GGT1	LRRN3	SYNGR3	ATP9A	BTG3	CMAH	HBEGF	SGCB
Th2_cells_Bindea_et_al	PMCH	AHI1	PTGIS	CXCR6	EVI5	IL26	MB	NEIL3	GSTA4	PHEX	SMAD2	CENPF	ANK1	ADCY1	AI582773	LAIR2	SNRPD1	MICAL2	DHFR	WDHD1	BIRC5	SLC39A14	HELLS	LIMA1	CDC25C	CDC7	GATA3
TFH_Bindea_et_al	CHI3L2	CXCL13	MYO7A	CHGB	ICA1	HEY1	CDK5R1	ST8SIA1	PDCD1	BLR1	KIAA1324	PVALB	TSHR	C18orf1	TOX	SLC7A10	SMAD1	POMT1	PASK	MKL2	PTPN13	KCNK5	ZNF764	MAF	MYO6	SIRPG	THADA	MAGEH1	B3GAT1	SH3TC1	HIST1H4K	STK39
Th17_cells_Bindea_et_al	IL17A	IL17RA	RORC
CD8_T_cells_Bindea_et_al	CD8B	CD8A	PF4	PRR5	SF1	LIME1	DNAJB1	ARHGAP8	GZMM	SLC16A7	SFRS7	APBA2	C4orf15	LEPROTL1	ZFP36L2	GADD45A	MYST3	ZEB1	ZNF609	C12orf47	THUMPD1	VAMP2	ZNF91	ZNF22	TMC6	FLT3LG	CDKN2AIP	TSC22D3	TBCC	RBM3	ABT1	C19orf6	CAMLG	PPP1R2	AES	KLF9	PRF1
Tgd_Bindea_et_al	TRDA	TARP	C1orf61	TRGV9	CD160	FEZ1
Cytotoxic_cells_Bindea_et_al	KLRD1	KLRF1	GNLY	CTSW	KLRB1	KLRK1	NKG7	GZMH	SIGIRR	ZBTB16	RUNX3	APOL3	RORA	APBA2	WHDC1L1	DUSP2	GZMA
NK_cells_Bindea_et_al	LOC643313	GAGE2	ZNF747	XCL1	XCL2	AF107846	SLC30A5	NM_014114	MCM3AP	TBXA2R	CDC5L	LOC730096	FUT5	FGF18	MRC2	RP5-886K2.1	SPN	PSMD4	PRX	FZR1	ZNF205	AL080130	ZNF528	MAPRE3	BCL2	NM_017616	ARL6IP2	PDLIM4	NM_014274	LDB3	ADARB1	SMEK1	TCTN2	TINAGL1	IGFBP5	ALDH1B1	NCR1
NK_CD56dim_cells_Bindea_et_al	KIR3DL2	SPON2	KIR2DL3	GZMB	KIR3DS1	KIR3DL1	FLJ20699	TMEPAI	IL21R	KIR3DL3	KIR2DS5	KIR2DS2	GTF3C1	KIR2DS1	EDG8	DUSP4	RRAD	XCL1	PLA2G6	NIBP	FOXJ1	MADD	BG255923	MPPED1	MUC3B
DC_Bindea_et_al	CD209	CCL17	HSD11B1	CCL13	CCL22	PPFIBP2	NPR1
iDC_Bindea_et_al	CD1B	VASH1	F13A1	CD1E	MMP12	FABP4	CLEC10A	SYT17	MS4A6A	CTNS	GUCA1A	CARD9	ABCG2	CD1A	PPARG	RAP1GAP	SLC7A8	GSTT1	NM_021941	FZD2	CSF1R	HS3ST2	CH25H	LMAN2L	SLC26A6	BLVRB	NUDT9	PREP	TM7SF4	TACSTD2	CD1C
aDC_Bindea_et_al	CCL1	EBI3	INDO	LAMP3	OAS3
Eosinophils_Bindea_et_al	IL5RA	KCNH2	TKTL1	EMR1	CCR3	ACACB	THBS1	GALC	RNU2	CLC	HIST1H1C	CYSLTR2	HRH4	RNASE2	CAT	LRP5L	SYNJ1	THBS4	GPR44	KBTBD11	HES1	ABHD2	TIPARP	SMPD3	MYO15B	TGIF1	RRP12	IGSF2	RCOR3	EPN2	C9orf156	SIAH1
Macrophages_Bindea_et_al	MARCO	CXCL5	SCG5	SULT1C2	MSR1	CTSK	PTGDS	COLEC12	GPC4	PCOLCE2	CHIT1	KAL1	CLEC5A	ME1	DNASE2B	CCL7	FN1	CD163	GM2A	SCARB2	BCAT1	RAI14	COL8A2	APOE	CHI3L1	ATG7	CD84	FDX1	MS4A4A	SGMS1	EMP1	CYBB	CD68
Mast_cells_Bindea_et_al	PRG2	CTSG	TPSAB1	SLC18A2	MS4A2	CPA3	TPSB2	NM_003293	GATA2	HDC	LOH11CR2A	SIGLEC6	ELA2	CMA1	PGDS	MLPH	ADCYAP1	SLC24A3	CALB2	KIT	TAL1	ABCC4	PPM1H	MAOB	HPGD	SCG2	PTGS1	CEACAM8	MPO	NR0B1	LOC339524
Neutrophils_Bindea_et_al	CSF3R	CYP4F3	VNN3	FPRL1	KCNJ15	MME	IL8RA	IL8RB	FCGR3B	DYSF	FCAR	CEACAM3	HIST1H2BC	HPSE	FLJ11151	CREB5	S100A12	TNFRSF10C	SLC22A4	KIAA0329	SLC25A37	BST1	CRISPLD2	G0S2	SIGLEC5	CD93	MGAM	ALPL	FPR1	PDE4B	LILRB2
SW480_cancer_cells_Bindea_et_al	KRT5	RBP1	TRIM29	DEFA5	BMP4	EEF1A2	VSNL1	ASPSCR1	IGF2	MFAP2	FGF3	S100A2	INHBB	JAG2	LOC89944	BAMBI	BMP7	RPP25	RHOD	DHRS2	ITGB4	NTSR1	STRA6	SLC1A5	FKBP4	S100A3	TEAD4	KLK6	CCND1	SLC27A5	HOXA9	F12	LRFN4	NM_024609	SLC6A8	PCTK1	KRT13
Normal_mucosa_Bindea_et_al	TSPAN8	LGALS4	DCN	COL3A1	CEACAM5	TAGLN	KRT20	MYH11	FXYD3	ACTG2	MYLK	TPM1	CDH17	NFIB	MGP	SPARCL1	RGS5	PPAP2B	IGFBP7	CALD1	C1R	AGR2	GNA11	HEPH	GNG12	ADH1B	CRIM1	FBLN1	IGFBP5	LAMA4	CAV1	WASL
Lymph_vessels_Bindea_et_al	PDPN	VEGFC	FIGF
Antigen_Processing_and_Presentation_Li_et_al	AZGP1	B2M	CALR	CANX	CD1A	CD1B	CD1C	CD1D	CD1E	CD4	CD8A	CD8B	CD74	CREB1	CTSB	CTSE	CTSS	FCER1G	FCGRT	PDIA3	HFE	HLA-A	HLA-B	HLA-C	HLA-DMA	HLA-DMB	HLA-DOA	HLA-DOB	HLA-DPA1	HLA-DPB1	HLA-DQA1	HLA-DQA2	HLA-DQB1	HLA-DRA	HLA-DRB1	HLA-DRB5	HLA-E	HLA-F	HLA-G	MR1	HSPA1A	HSPA1B	HSPA1L	HSPA2	HSPA4	HSPA5	HSPA6	HSPA8	HSP90AA1
Antimicrobials_Li_et_al	HAMP	PI3	CAMP	PPBP	REG3G	CXCL14	CXCL16	SLPI	CXCL10	CXCL9	CXCL5	CXCL11	CXCL6	CXCL1	CXCL12	CXCL13	CXCL2	PF4	XCL1	CXCL3	DEFB103A	CCL13	CCL1	DEFB1	CCL8	ELANE	DEFB103B	DEFA3	DEFA1	TMSB10	DEFA6	DEFA5	DEFA4	LCN2	LCN1	COLEC10	BPI	S100A9	S100A8	DCD	LCN6	S100A12	HTN3	LCN8	CCR10	CELA1	DEFB106A	PENK	MMP12
BCR_Signaling_Pathway_Li_et_al	CD79A	CD79B	LYN	SYK	BTK	BLNK	VAV3	VAV1	VAV2	RAC1	RAC2	RAC3	PPP3CA	PPP3CB	PPP3CC	PPP3R1	PPP3R2	CHP2	NFAT5	NFATC1	NFATC2	NFATC3	NFATC4	HRAS	KRAS	NRAS	FOS	JUN	CARD11	BCL10	MALT1	CHUK	IKBKB	IKBKG	NFKB1	RELA	NFKBIA	NFKBIB	NFKBIE	CD81	CD19	CR2	PIK3R5	PIK3R1	PIK3R2	PIK3R3	PIK3CA	PIK3CB	PIK3CD
Chemokines_Li_et_al	C3	C5	CAMP	CCL1	CCL11	CCL13	CCL14	CCL15	CCL16	CCL17	CCL18	CCL19	CCL2	CCL20	CCL21	CCL22	CCL23	CCL24	CCL25	CCL26	CCL27	CCL28	CCL3	CCL3L3	CCL4	CCL4L2	CCL5	CCL7	CCL8	CKLF	CMA1	CTSG	CX3CL1	CXCL1	CXCL10	CXCL11	CXCL12	CXCL13	CXCL14	CXCL16	CXCL17	CXCL2	CXCL3	CXCL5	CXCL6	CXCL9	CYR61	DEFA1	DEFA3
Chemokine_Receptors_Li_et_al	C5AR1	CCR1	CCR10	CCR3	CCR4	CCR5	CCR6	CCR7	CCR8	CCR9	CCRL2	CMKLR1	CX3CR1	CXCR3	CXCR4	CXCR5	CXCR6	CYSLTR1	CYSLTR2	EDNRA	EDNRB	FPR1	FPR2	GPR17	GPR32	GPR33	LTB4R	LTB4R2	PLAUR	PLXNA1	PLXNA2	PLXNA3	PLXNA4	PLXNB1	PLXNB2	PLXNB3	PLXNC1	PLXND1	PTAFR	ROBO1	ROBO2	ROBO3	RXFP3	XCR1
Cytokines_Li_et_al	ADIPOQ	ADM	ADM2	AGRP	AGT	AMBN	AMELX	AMH	ANGPTL5	ANGPTL7	APLN	AREG	ARTN	AVP	AZU1	BDNF	BMP1	BMP10	BMP15	BMP2	BMP3	BMP4	BMP5	BMP6	BMP7	BMP8A	BMP8B	BTC	C3	C5	CALCA	CALCB	CAMP	CAT	CCK	CCL1	CCL11	CCL13	CCL14	CCL15	CCL16	CCL17	CCL18	CCL19	CCL2	CCL20	CCL21	CCL22	CCL23
Cytokine_Receptors_Li_et_al	ACVR1B	ACVR1C	ACVR2A	ACVR2B	ACVRL1	ADCYAP1R1	ADIPOR1	ADIPOR2	ADRB1	ADRB2	AGTR1	AGTR2	AMHR2	ANGPT1	ANGPT4	ANGPTL1	ANGPTL2	ANGPTL3	ANGPTL4	ANGPTL6	APLNR	AR	AVPR1A	AVPR1B	AVPR2	BMPR1A	BMPR1B	BMPR2	BRD8	C3AR1	C5AR1	CALCR	CALCRL	CCR1	CCR10	CCR3	CCR4	CCR5	CCR6	CCR7	CCR8	CCR9	CCRL2	CD40	CMKLR1	CNTFR	CRHR1	CRHR2	CRIM1
Interferons_Li_et_al	IFNA10	IFNA13	IFNA14	IFNA16	IFNA17	IFNA2	IFNA21	IFNA4	IFNA5	IFNA6	IFNA7	IFNA8	IFNB1	IFNE	IFNG	IFNK	IFNW1
Interferon_Receptor_Li_et_al	IFNAR2	IFNGR1	IFNGR2
Interleukins_Li_et_al	IL11	IL12A	IL12B	IL13	IL15	IL16	IL17A	IL17B	IL17C	IL17D	IL17F	IL18	IL19	IL1A	IL1B	IL1F10	IL1RN	IL2	IL20	IL21	IL22	IL23A	IL24	IL25	IL26	IL27	IL3	IL31	IL32	IL33	IL34	IL4	IL5	IL6	IL6ST	IL7	IL9	TXLNA
Interleukins_Receptor_Li_et_al	IL10RA	IL10RB	IL11RA	IL12RB1	IL12RB2	IL13RA1	IL13RA2	IL15RA	IL17RA	IL17RB	IL17RC	IL17RD	IL17RE	IL18R1	IL18RAP	IL1R1	IL1R2	IL1RAP	IL1RL1	IL1RL2	IL20RA	IL20RB	IL21R	IL22RA1	IL22RA2	IL23R	IL27RA	IL2RA	IL2RB	IL2RG	IL31RA	IL3RA	IL4R	IL5RA	IL6R	IL7R	IL9R
Natural_Killer_Cell_Cytotoxicity_Li_et_al	HLA-A	HLA-B	HLA-C	HLA-E	HLA-G	KIR3DL1	KIR3DL2	KIR2DL1	KIR2DL3	KIR2DL4	KLRC1	KLRC2	KLRC3	KLRD1	PTPN6	PTPN11	ICAM1	ICAM2	ITGAL	ITGB2	PTK2B	VAV3	VAV1	VAV2	RAC1	RAC2	RAC3	PAK1	MAP2K1	MAP2K2	MAPK1	MAPK3	TNF	CSF2	IFNG	NCR2	TYROBP	LCK	FCGR3A	FCGR3B	NCR1	NCR3	FCER1G	CD247	ZAP70	SYK	LCP2	LAT	PLCG1
TCR_signaling_Pathway_Li_et_al	CD3D	CD3E	CD3G	CD247	CD4	CD8A	CD8B	PTPRC	LCK	FYN	ZAP70	LCP2	LAT	ITK	TEC	NCK1	NCK2	VAV3	VAV1	VAV2	GRAP2	GRB2	PAK1	PAK2	PAK3	PAK4	PAK6	RHOA	CDC42	PPP3CA	PPP3CB	PPP3CC	PPP3R1	PPP3R2	CHP2	NFAT5	NFATC1	NFATC2	NFATC3	NFATC4	SOS1	SOS2	HRAS	KRAS	NRAS	FOS	JUN	CARD11	BCL10
TGFb_Family_Member_Li_et_al	BMP1	BMP10	BMP15	BMP2	BMP3	BMP4	BMP5	BMP6	BMP7	BMP8A	BMP8B	GDF1	GDF10	GDF11	GDF15	GDF2	GDF3	GDF5	GDF6	GDF7	GDF9	GDNF	INHA	INHBA	INHBB	INHBC	INHBE	LEFTY1	LEFTY2	NODAL	TGFB1	TGFB2	TGFB3
TGFb_Family_Member_Receptor_Li_et_al	ACVR1B	ACVR1C	ACVR2A	ACVR2B	ACVRL1	AMHR2	BMPR1A	BMPR1B	BMPR2	TGFBR1	TGFBR2	TGFBR3
TNF_Family_Members_Li_et_al	TNFRSF11B	TNFSF10	TNFSF11	TNFSF12	TNFSF13	TNFSF13B	TNFSF14	TNFSF15	TNFSF18	TNFSF4	TNFSF8	TNFSF9
TNF_Family_Members_Receptors_Li_et_al	TNFRSF10B	TNFRSF10C	TNFRSF10D	TNFRSF11A	TNFRSF12A	TNFRSF13B	TNFRSF13C	TNFRSF14	TNFRSF17	TNFRSF18	TNFRSF19	TNFRSF1A	TNFRSF1B	TNFRSF21	TNFRSF25	TNFRSF4	TNFRSF6B	TNFRSF8	TNFRSF9
T_cell_accumulation_Peng_et_al	FYN	F11R	SEMA4D	CCL1	EGR2	TBC1D22A	WNT10B	DGKA	TAP1	DGKZ	JUN	CXorf56	NPTXR	HIPK2	CBLB	BTG2	ENTPD1
T_cell_exhaustion_Peng_et_al	HSPA1B	HSPA1A	NR4A2	RGS1	TNFAIP3	CAMK2N1	DUSP1	NR4A3	IFIT3	IFIT1B	FOSB	CCL5	SAMD3	CCL3L3	MACC1	VPS37B	TF	DSEL	SPATA20	ADSSL1	DHX58	SPP1	TRIM15	DUSP26	ABI3	SFN	C1QC	RTP4	JUN	BCKDHB	CCL4	POU6F1	CYSLTR2	SLC14A1	RGS16	CUEDC1	DEDD2	CPEB1	CTSS	TMEM88	FAM196B	SKI	BTG1	SYCP2L	RGS2	ABCB1	ADRB2	CD69	RNF166
T_cell_regulatory_Peng_et_al	FOXP3	ITGB8	LRRC32	IKZF2	PENK	GPR83	WLS	PLAGL1	CD80	NT5E	IL10	FAM160A1	ECM1	CXCL10	PTPRJ	IL1R2	CORO2A	ARHGAP20	CD83	LY96	IKZF4	ANKRD55	NEB	RRAGD	TRAT1	SAMD9L	SCIN	TNFRSF8	FAM129A	CD200R1	IL18R1	MAF	RLN3	CCR6	SLC14A1	LDLRAD4	PHLPP1	ITGAE	CCR8	IFNGR1	SLC9A7	MYO1E	ZSCAN29	ANKRD12	GPR52	JUN	TTC39C	IFITM3	DUSP4
ICB_resistance_Peng_et_al	KCNJ13	ADGRE1	LYZ	DPT	HLA-DQB1	LPAR4	CD53	SPP1	GXYLT2	IRGM	CXCL10	RTP4	FSCN1	FCGR3B	FCGR3A	IFI44	PLXNC1	CCL3L3	CYBB	USP18	IRF4	HLA-DQA1	TYROBP	ZBP1	MGLL	TGFBI	PTPRC	PSMB9	IFI16	CTSS	FOLR2	FAM81A	PDE8A	CCR5	SERPINB2	CLEC12A	MS4A7	CD180	OAS2	CCR2	HLA-DRB5	PLD4	XAF1	SLC7A8	CD84	CD74	CYTH4	FCER1G	IL7R
MDSC_Peng_et_al	IL13RA2	SERPINE2	CT45A1	MAGEA4	MAGEA3	FDCSP	XAGE1B	IGFBP3	BMP2	LCN2	MRGPRX3	RRM2	COL9A3	UBE2C	ID1	BEX3	CTHRC1	AKAP12	WWTR1	SPOCK1	KRT18	CT45A5	TNC	SPANXB1	DCBLD2	CCNB1	SFRP1	OVOS2	HAS2	DKK1	MAGEC2	S100A16	PAGE5	PRAME	KRT6B	FAT1	APOBEC3B	ITGA2	PMEPA1	TM4SF1	MAGEA2	SERPINA3	MOCOS	TUBB3	POPDC3	S100A13	ASPM	GTSF1	YAP1
TAM_Peng_et_al	F13A1	FCER1A	CCL17	FOXQ1	ESPNL	CD1A	GATM	CCL13	PALLD	GALNT18	MAOA	RAMP1	STAB1	CCL26	CCL23	PARM1	CD1E	ITM2C	CALCRL	CRH	RGS18	MS4A6A	DHRS2	PON2	ALOX15	RAB33A	MOCOS	CCL18	IL17RB	FABP4	CMTM8	QPRT	CDR2L	DUOXA1	ABCC4	SYT17	PPP1R14A	PDGFC	GPT	FAM189A2	RASAL1	IPCEF1	ZNF366	MAP4K1	RAB30	PCED1B	TMIGD3	SH3BP4	RRS1
CAF_Peng_et_al	COL3A1	COL1A2	COL1A1	CTSK	THBS2	COL6A3	C1S	COL5A1	C3	SFRP2	COL6A1	C1R	VCAN	MXRA5	MMP3	ISLR	DCN	COL5A2	CRISPLD2	CDR1	CXCL14	COL12A1	ADAMDEC1	AEBP1	LUM	MMP1	SERPINF1	TIMP2	IGFBP5	SPARC	CHI3L1	PLAT	SULF1	GREM1	BGN	DKK3	COL8A1	TIMP1	RARRES2	C11orf96	FBN1	TMEM158	THY1	PCOLCE	CYR61	EFEMP1	CTHRC1	ACTA2-AS1	FBLN1
T_cell_probe_Jeschke_et_al	RASSF1	SHANK2	FAM113B	VSX1	DRD4	CD6	OSM	BIN2	SEMA3B	VAV1	MT3	HEM1	LCK	EDG6	KLHL6	ADA	PTPRCAP	Cl6orf54	INA	LAT	SH2D3C	CD3D	PPP1R16B	ALDH1A3
MeTIL_Jeschke_et_al	PTPRCAP	KLHL6	INA	SEMA3B	RASSF1
[truncated: 414 more columns]
