# Supplementary material for: Construction and Validation of a Tumor Microenvironment-Based Scoring System to Evaluate Prognosis and Response to Immune Checkpoint Inhibitor Therapy in Lung Adenocarcinoma Patients
Source: Genes (Basel). 2022 May 26;13(6):951. doi: 10.3390/genes13060951 (PMC9222903; doi:10.3390/genes13060951)
Supplement: Supplementary file 1 [file genes-13-00951-s001.zip › Supplementary table S2.CSV]

Sample_ID	A1BG|1	A1CF|29974	A2M|2	A2ML1|144568	A3GALT2|127550	A4GALT|53947	A4GNT|51146	AAAS|8086	AACS|65985	AADAC|13	AADACL2|344752	AADACL3|126767	AADACL4|343066	AADAT|51166	AAGAB|79719	AAK1|22848	AAMDC|28971	AAMP|14	AANAT|15	AAR2|25980	AARD|441376	AARS|16	AARS2|57505	AARSD1|80755	AASDH|132949	AASDHPPT|60496	AASS|10157	AATF|26574	AATK|9625	ABAT|18	ABCA1|19	ABCA10|10349	ABCA12|26154	ABCA13|154664	ABCA2|20	ABCA3|21	ABCA4|24	ABCA5|23461	ABCA6|23460	ABCA7|10347	ABCA8|10351	ABCA9|10350	ABCB1|5243	ABCB10|23456	ABCB11|8647	ABCB4|5244	ABCB5|340273	ABCB6|10058	ABCB7|22
Gide_ipiPD1_Patient1_EDT	688.7174	4	80739.69765	4042.00003	14.4298	956	37	10512.0024	3052.9989	204.0005	351.0002	113.922	8	1836.9964	6331.999	8107.99676	881.00912	5962.004	44.00002	1768.0037	8	32208.9706	13499.7779	3116.54807	4931.0025	4067.8902	11547.0055	8154.9986	146.52419	922.00049	44634.037	6991.2864	9998	2722.9953	5463.00375	2304.003	376	12797.00493	20250.952	1261.995417	12587.99943	14844.43902	1448.7174	3907.9959	160.99958	1389.27967	4792.9975	1557.78218	10434.62001
Gide_ipiPD1_Patient1_PRE	754.81543	7	78045.08584	54.000051	6	441.0003	15	10996.9944	2406.00311	21	5	1	0	1575.9967	4625.00401	6542.99796	694.1442609	6293.0047	35.00004	1578.00168	0	39280.0116	13482.4983	3371.36377	4558.99923	4013.0092	10762.9996	9078.9966	128.45017	704.00084	29669.009	1127.80629	38.99997	1738.004	2986.999884	860	102.99996	4940.9987	4091.0017	821.9997649	2690.0045	3597.89482	554.7391	3499.0034	37.999977	247.260587	6063.999	2265.17767	9010.67836
Gide_ipiPD1_Patient10_PRE	143.09072	5	20336.88656	46	0	147	30	1501.99519	513.00056	20	0	0	2	1322.9967	1305.9977	1344.00054	138.0000064	1090.9994	0	769	0	4604.0038	1296.34	384.62195	1751.00069	277.58421	3561.002	1525.9964	15.00001	1807.99824	8538.9961	358.0002	616.99962	25	1689.000364	153.999975	11	689.00021	689.0002	57	3167.00572	441.0004	170.00036	413.99976	0	429.9997	0	442.94972	2282.733
Gide_ipiPD1_Patient12_PRE	420.7358	0	586590.2849	24.00001815	9	890.00015	21	6033.99518	824.99969	231	180.00047	0	0	972.0001	1905.00452	9009.998	471.56551	2481.9996	25.00008	1000	58.4952	16293.0375	1887.9984	923.05048	3457.004244	1150.99936	10011.0027	2578.99976	463.3883	1268.497215	59209.96	6125.71333	109	6434.0001	5748.999121	54872.05744	244.99969	8228.9943	19539.0198	2404.99739	17874.61686	9393.87694	3870.94287	2273.9993	52	1413.060741	2162.9992	485.17402	4212.71229
Gide_ipiPD1_Patient13_EDT	97.416	4	56163.5571	1.999999	1	92	7	1776.99835	286.0002202	7	1	0	0	67.99994751	986.0004	2721.9991	90.999969	1246.0002	7	548	0	5952.0027	524	363.16191	677.9996347	185.00003	1360.00019	1767.00112	11.84151	529.0001	48941.019	163.00004	5.000001	11	2029.997322	363.00005	64.000061	1443.0006	730.99965	761.999738	391.9995738	445.9999	1922.574405	594.0005	17.00005	317.4217989	590.000406	160.5346	1505.85907
Gide_ipiPD1_Patient13_PRE	54.05875	1	44566.82306	10.0000032	3	38	2	2164.99458	393.99996	3	0	0	0	128.00003	1598.001	2396.00247	112.00003	1946.999794	3	851	2	6771.0012	1196.00439	724.08027	854.00024	268.99947	4365.99445	2945.99518	15.55536	474.99984	8261.9978	151.99997	13	131.99954	1863.99992	261.9995	148.99966	2044.99989	277.99959	544.999725	218.00002	207.99982	1430.07962	687.00051	6	601.916132	3770.99977	650.89182	2104.81452
Gide_ipiPD1_Patient14_PRE	237.23524	0	18103.7748	1	0	111	11	2334.996905	873.0000756	18	13	0	0	415.99974	749.9997	1483.9998	155.00023	1100.9994	1.999995	910	13	11771.9511	1160.00456	1079.736739	1555.9996	562.70954	9848.0069	1362.99983	20	721.00033	9962.0029	380.659614	62.000086	41	1652.000203	1221.9997	16.999996	11856.99964	1221.0019	245.0001482	866.00025	785.93365	96.00003	1502.9979	5.999996	68.0000384	9	243.84135	2191.77859
Gide_ipiPD1_Patient15_PRE	222.2259	0	31599.441	191.99996	1	56	1	4356.000266	392.99984	2	49.99996	2	0	291	1958.00346	2120.9983	237.99976	1963.00051	4	1121	0	14766.0017	1611.99639	765.50243	9846.99971	428.55501	3046.99478	2326.00032	195.6416	69.00005	8781.004	292.31781	497.00031	6332.99974	1647.999256	188	39.000025	3187.00545	586.00009	355.00041	356.99981	377.0002	191.17533	1673.999	2	93.82457	19394.00376	757.25362	3946.76698
Gide_ipiPD1_Patient17_PRE	404.3411	4	108203.0115	11	37	314.0002	65	7463.00022	987.0001701	27	0	1	0	1102.0004	1500.99679	4304.99671	238.89026	2474.0005	13	793	244	10200.0023	1642.18966	969.12774	1719.999	1282.64217	12782.00656	2523.00394	56.987226	845.00047	23495.019	923.9989	156	3648.99907	4851.99735	1917.995	161.0001	1821.99976	13165.9859	1027.99996	15804.92206	5463.1074	511.622	1667.9993	30	4026.384143	2	520.855	3660.0649
Gide_ipiPD1_Patient19_EDT	83.88997346	1	38751.75287	3	0	116	5	1968.00447	257.99968	1	2	0	0	162.99998	1418.002939	1535.0001	88.99999	1087.00011	9	865	0	8709.99946	3081.9956	839.9043	1369	346.31399	2459.00012	2283.99532	61.70376	253.999558	12135.0388	473.0002	34	462.0005	2241.9968	1855.00334	19.999983	5240.00233	865.99989	411.9998401	402.99983	833.99995	565.4815	865	20	216.5183731	12679.99083	252.92571	1861.2195
Gide_ipiPD1_Patient19_PRE	239.60628	0	22898.53154	9	0	115	1	2395.002813	245.99988	2	4	0	0	125	1423.9968	1406.99922	116.00006	1072.99961	8	999	3	11648.0164	3685.89654	846.956247	1389.99995	423.7987	3484.00382	2666.00471	112.7348	261.8475	11832.019	938.7157	21.00003	521.9998	2370.00473	1170.9999	33.00003	5827.00391	967.9998	486.0003504	521.0002244	999.00042	555.99972	797.0005	6	490.999941	19415.97123	216.31016	2053.016767
Gide_ipiPD1_Patient2_PRE	276.37465	0	210581.8681	0	21	130	4	4280.0052	228.0004122	1	1	0	0	781.0004	1786.0044	2863.0007	168.00016	1734.9996	3	463.0004	77	7903.0007	2269.45762	1034.01	724.999403	1365.00008	4838.9963	1850.99675	77.4302	524.00013	17075.9957	541.9992	55	844.0002881	2228.002036	2255.997	1249.00002	565.99976	6378.0044	641.9994999	7793.6939	2700.00808	238.1414	1241.0028	0	3796.85827	50	426.32356	1353.80999
Gide_ipiPD1_Patient20_PRE	462.47974	34.00001002	31548.36086	37.99996	0	451.0003	31	6031.999184	803.99996	9	5	0	12	289.00007	2203.0019	33171.99239	225.12498	1880.9994	33.00003	916	3	14323.0137	3000.8824	1014.80727	5631.994968	992.00002	6113.0058	4567.00104	21	2075.8939	30795.996	4051.35974	30.0000129	214.00008	5851.99885	4511.008	164.0001	20339.0158	8867.9979	7412.005737	5124.644881	3582.90689	4689.63	3167.9948	457.00036	6112.376246	6	566.9224	7436.9944
Gide_ipiPD1_Patient21_PRE	740.57557	3	456874.7417	6	3	533.98663	58	6942.99509	1160.00016	3	9	0	2	3661	3892.9962	16092.98988	401.03723	3987.001015	36.00003	1552.99647	55	29993.9798	4623.405	3191.47182	4105.997253	2392.8032	11994.0005	5678.003	95.00662	1507.00147	35951.031	2710.00138	276.9995	29093.008	7275.99564	3291.00051	2645.0008	12657.00154	6158.99795	3569.00211	4655.00251	2890.30757	4411.4897	4791.9973	130	10741.51825	31.99996	1356.68656	6445.10041
Gide_ipiPD1_Patient23_PRE	177.05712	0	76825.82643	15	8	96	7	7211.996248	792.99999	17.99997	16.99997	0	0	514.9999	1536.0002	3493.9967	209.9647412	3958.99564	1	932	0	45706.9604	2737.78399	1425.24157	2221.9989	1842.0045	3648.0039	3713.00299	57.21729	385.00013	7212.998	147.3587	101	665.00032	3933.003323	14699.00501	90.00008	870.00044	358.00033	1400.00031	475.99996	991.99942	1434.3682	1215.9994	21	190.63441	500.99982	520.58231	3207.0045
Gide_ipiPD1_Patient24_PRE	272.29144	0	126323.6749	6	0	225	12	4814.0036	780.000283	10	9	0	0	319.99997	1469.9957	2426.00069	98.00001	2368.99952	13.00005	941.00003	0	13624.9663	1715.90437	964.44778	1264.9999	309.06875	4134.9981	2958.00119	89.6424	163.00051	6863.9964	501.99954	63.000012	424.0000011	2130.99847	2896.0032	14	1514.99991	1302.0002	1176.000154	1314.99911	1207.00226	210.95831	995.001	6	178.04193	230	614.42102	2039.55691
Gide_ipiPD1_Patient25_PRE	807.4085	1	219855.314	2	12	254.99985	118	7963.002	1428.00028	14	13	0	0	7751.0042	2651.99771	9478	269.05045	2681.00198	24.00002	1325	284	28402.0381	3152.4798	1367.814	3457.002	2379.6401	23348.0093	2137.00059	64	2064.26798	46499.033	57874.9049	124.9995	3326.00298	6905.000349	5170.00409	82.00001	17799.00046	117370.898	844.00033	128308.4154	14826.92325	469.6903	2580.9956	1	3374.309	6	1793.70297	5134.9609
Gide_ipiPD1_Patient26_PRE	643.23696	2	31592.80275	2	5	305	4	6100.0037	994.00052	3	3	0	3	1303.99993	2098.99871	6285.0014	328.9889243	4913.0055	9	1171.9995	1	13328.0369	5695.6148	1911.61192	2466.99962	1578.99207	9193.0033	2809.00283	45.99996093	431.000142	27671.98	1626.93961	11	662.99987	2479.00031	577.9998	1807.99596	6761.99839	2350.9969	3455.995428	2046.9956	2612.00655	2111.3778	3640.9955	52	685.62097	43.00008	1890.15284	4668.9848
Gide_ipiPD1_Patient27_EDT	170.1628	0	141903.681	10.0000021	0	153.0001	2	3316.00316	388.00018	2	1	1	1	126.99998	1493.0047	2099.00409	139.999893	2972.9998	1.999997	1394.9994	1	11380.9543	1436.92576	1037.68624	1362.999715	410.63154	5540.99853	3463.00295	85.92399	299.99948	15795.011	257.21232	65	79.00002	2706.00394	1406.00044	23.0000333	3200.99767	681.99971	481.9990289	1758.00244	1177.76761	833.80139	919	21	515.1994915	8976.005	369.02147	2405.96663
Gide_ipiPD1_Patient27_PRE	218.2715	1	121127.4114	3.999997	0	112.00022	1	2185.00301	237.00041	0	4	0	0	221.0005	1274.9987	1866.00189	98.99999	2494.9995	5.999996	1205	0	10356.00066	955	957.10003	1597.9968	396.2038	3913.00034	2371.00011	28.8664962	260.5252	15908.991	374.26591	65	53.99996	2253.00344	1966.002	8.000004	3263.9963	902.0005	395.0002	3216.00325	2167.99833	811.5253	792.00027	25	310.4749104	8191.003	330.87889	2440.00305
Gide_ipiPD1_Patient32_PRE	472.39067	1	14944.11296	16	0	193.00048	30	4645.99487	475.00027	11	55.00003	0	0	633.0001	1315.99557	6370.0024	201.389	1268.000151	77.99998	494	9	8119.9966	2111.00215	1089.83979	3449.9941	799.06805	15136.002	2026.00324	28.304004	254.0005	24469.975	1181.53114	103.00004	1246	3054.9991	1655.00039	140.0004	12717.9967	4039.9974	1546.99553	461.99998	2871.99393	1478.1588	3099.995	13	456.83756	493.0006	716.97667	3164.99896
Gide_ipiPD1_Patient33_EDT	84.69124	0	50494.91914	2.999999	0	234.9996	11	1972.99777	316.99978	4	1	0	0	200.00049	1158.002	2376.99608	77.00003	1449.000968	9	588	1	7568.0044	699.99997	514.518981	697.999606	194.57309	1212.00024	2180.00043	16.59792	426.99986	33850.022	116.000034	21	136.99957	1554.998849	249.00007	31.99995	541.00026	1311.0042	476.9997391	659.00005	977.66321	420.457324	535.0005	11	206.54233	1084.0003	246.6289	1506.4819
Gide_ipiPD1_Patient33_PRE	101.4084	9	19554.85766	0	1	81	1	1897.00509	409.00033	10	1	0	0	422.00001	1736.99581	1554.99979	93	1664.998862	1	629	0	8384.99698	1196.88299	383.80187	789.99951	261.98151	1794.00087	2950.00148	25.06964	96.00006	6656.9969	105.1895837	10	121.0005	985.9996933	222.0005	26.999979	709.9998	647.0003	283.99954	902.9994	458.92305	122	583.9998	1	69.99998269	6604.0058	733.64406	1870.84482
Gide_ipiPD1_Patient34_PRE	494.46237	2	196302.6769	19.999984	9	449	30	5668.0029	686.99995	30.99996	23	0	0	217.9996	1397.0019	2911.9976	220.68298	2798.0012	7	827	17.99999	10585.0349	6565.4546	1111.48926	1735.999301	1684.9985	7862.0073	2798.9981	220.9646	221.00039	26944.965	936.78639	9	565.00014	4992.998923	21078.9652	50.99991	2650.99743	3441.9962	2051.00222	2637.59317	1946.39896	941.59917	926	5	2731.403859	1644.9993	739.258544	2461.3602
Gide_ipiPD1_Patient35_EDT	308.02876	2	54364.08353	3	0	146	1	3431.9948	394.00028	8	1	0	0	376.0003979	1406.0021	2182.9991	161.00001	1817.99988	1	814.00092	0	17127.96985	2109.9964	1064.23025	1132.9999	394.84428	6406.9969	2953.00405	13	792.0004	3468.0004	219.00058	41.99996	37.00002	4750.001288	9677.00418	9.00000503	717.99992	666.99984	596.00026	3149.998655	704.9999	177.57223	773.99954	16	150.4280601	9675.99375	183.0363304	2685.20434
Gide_ipiPD1_Patient35_PRE	210.1348	0	21592.82131	198.99988	0	110	6	1926.00056	378.0004	17.00001	107	56	0	166.99995	763.0001	1309.9993	140.00002	1138.99998	2	398	5	7267.9972	1274.99718	514.51904	1045.00019	219.99999	3871.9973	1691.99855	10.52525	390.00039	3235.99771	767.9993	1449.0002	93	2668.997322	3151.001	33.99997	3068.99549	1777.0024	413.0002982	1827.996753	1123.002447	194.75351	532.0003417	26.0000007	290.2465414	9902.9995	243.797329	2224.0023
Gide_ipiPD1_Patient36_EDT	118.20273	1	118855.8701	9	0	151	4	2958.004171	396.9995	2.000005	0	0	0	202.00008	1430.99821	4038.99895	70.00007	1762.0001	28.99997	767	2.000002	6058.005	683.00021	737.19825	1529.99904	294.77784	4187.99828	2190.99658	460.69639	765.00038	28555.985	752.49038	24.99998	275.9995	3760.003795	465.00016	22.000024	5299.99919	1962.0016	775.9997185	1156.000155	1491.91191	3143.94309	1128.996	23.999974	487.057599	678.00028	336.74854	3188.1925
Gide_ipiPD1_Patient36_PRE	152.8914	0	112689.3433	3	0	124.00041	4	3489.99628	539.99975	2	0	0	0	292.00034	1772.0037	2610.9972	64	2438.0008	15.99997	882	4	8449.9973	882.89705	1075.83701	1185.99969	224.83824	5037.00784	2673.99806	1107.04189	493.0003	19143.008	361.8186	15	298.99994	2659.00122	356.99974	24	5093.9933	580.99952	555.0000402	521.000134	480.00019	910.9153	980.0003	4	222.08548	660.00045	538.02711	3552.14496
Gide_ipiPD1_Patient37_PRE	124.7421	2.000001158	50784.24558	0	0	72	41	2692.00207	284.99994	0	7	0	0	460.00031	1242.99796	2625.99892	120.99998	1560	4	536	0	12243.04032	1044.89924	642.9862074	1112.9996	238.00037	2203.99891	2130.00238	18.991	472.00007	19171.011	263.99997	69	1206.99975	2438.004224	1557.99957	32.000047	2754.99862	511.00053	622.0000176	4.999998	335.99984	877.191711	657.0004	4	1262.80959	7373.00296	347.75337	1760.95376
Gide_ipiPD1_Patient44_PRE	98	7	23815.8213	182.99972	0	286	16	1647.99985	341.99986	2.000003	29	0	0	298.9996	815.0003	1953.00069	68.99992	982.00082	8	332	0	7296.996	368.673	355.193743	859.9997001	148.99999	1850.9963	1270.00225	36.90244	226.0003396	9486.005	282.99984	324.00035	103.99998	1216.00022	1033.99962	61	1330.99965	1210.99509	259.00001	654.9992227	737.00017	686.2415	434.0003	5.000002	3889.763186	29.99999	237.22007	1067.81719
Gide_ipiPD1_Patient45_PRE	953.84589	0	116793.7535	15	0	841.0003	29	8190.99338	1256.00052	3	6	0	0	1172	2507.9968	11138.999	413.79231	5157.99306	17.99997	2008.002	15	28622.0309	4542.2295	1845.50759	2007.005122	1043.5833	12085.0067	5279.99885	292.61914	445.99946	34215.011	1113.10449	128.9995	1320.998	3154.005226	1123.99934	318.99963	5345.99563	2502.9986	1504.995285	2291.9998	3991.98847	1220.7776	2570.0011	0	2851.2275	17303.99222	2387.594847	4369.0081
Gide_ipiPD1_Patient46_PRE	387.61631	5	203859.6723	57.99999	1	902	26	8120.003039	1206.99999	36	63.00003	0	5	1157.9998	2905.0026	8862.9963	428.149386	3550.995531	38.00004	1219.004	7	35927.9633	3019.9973	1244.43918	4826.993258	2169.8318	14629.0009	3561.001	191.4376	1175.99709	51706.978	2569.99592	383.99977	23013.04861	5384.997617	6832.9994	396.0001	6329.0081	7144.00404	2903.99862	4766.9952	3644.00335	3120.859	1806.9995	152	1307.140517	7402.00599	1028.98536	5935.714
Gide_ipiPD1_Patient47_PRE	146.3706	0	225890.3431	1	0	66	4	2201.99887	438.0001	2	7	0	0	1494.99764	985.0003566	2196.9948	149.99996	1534.00131	8	696	20.99997	10595.99892	1095	619.656885	1123.00024	316.6958	5964.9931	2045.99754	22	336.9998	11098.0112	750.95355	54.99998	526.0001323	2590.99576	5400.99732	9.000001	6077.00797	3038.0019	411.999779	1636.00177	1104.00051	672.19699	650.99952	28	258.80354	238.0001	273.2714	2049.03896
Gide_ipiPD1_Patient49_PRE	199.00394	12	59596.56526	18	0	254	0	1970.9962	495.00106	21.99997	11	0	0	225.00039	1270.9965	2364.9968	152.000007	1527.0011	12.00001	581.001	0	5955.0064	1333.7876	695.22878	1230.000151	108.409166	1304.0054	2806.99723	79.729861	107	6705.9991	427.00053	77	803.0007	762.00016	270.00056	29.000034	1731.00061	1279.99957	365.00059	1305.00042	955.8992	467.00075	791.00023	0	4488.006	4292.0029	627.05795	2066.29124
Gide_ipiPD1_Patient50_PRE	153.23746	0	17783.77618	1	0	147.0003	6	2335.99876	367.00021	2.000001	1	0	0	384.99912	1338.0001	3064.9945	144.00001	1864.00048	8.000002	593.99977	6	14686.9685	1054.00495	803.3458213	957.9999	212.99968	4166.00258	2567.00263	280.21476	551.9737	19357.993	421.99975	39.999981	764.00037	1321.999346	2531.00167	8	1769.99993	1035.00005	480.0002735	1625.001919	742.00009	615.70565	690.0002	12	6314.29575	12	316.72476	1931.86478
Gide_ipiPD1_Patient6_PRE	684.5805	0	168163.5938	58.99998	0	357.99984	8	8873.000115	1276.00067	0	7	0	0	308.9999	3200.99988	7208.0015	393.9406307	5781.0019	13	1817.997	14	31594.9554	5892.1103	3015.64656	2862.00036	1693.999052	12320.0012	5783.9981	1095.1559	193.9996546	25457.01	1991.1759	60	1364.0032	1623.99736	2901.00127	38	9909.99059	2232.998874	1043.000044	2787.00272	1187.99953	758.4468	2776.9965	36	2085.550728	7424.9938	1516.60923	5180.99722
Gide_ipiPD1_Patient7_PRE	303.54884	9	60717.24944	0	0	139	20	2773.00307	460.99973	35	1	0	0	809.00058	1507.9985	2964.00194	187.590913	1490.000335	15	989	1.999997	9149.9952	2016.93	680.59027	2072.998664	1011.00009	1826.00094	2007.0013	512.02963	194	15721.043	470.6136	19	68	2767.002967	934.0003	7	2837.9978	1264.99846	285.00014	1868.001055	647.0003	655.7189	1727.9954	2	5097.284581	12709.00545	426.69902	3070.865001
Gide_ipiPD1_Patient8_PRE	100.23608	0	6605.25958	2	0	49	6	1984.997172	239.00021	0	2	0	0	354.0006	1188.00357	1461.99973	84.99998	1378.0004	1	512.9996	0	9293.9966	692.841	910.33983	1123.00052	850.2699	1666.00045	3243.00205	39.19859	46.00001	3400.004	179.21094	26	11	283.9999736	81.99998	9	1706.99985	195.99989	447.0002201	161.0001874	116.00011	165.99985	1182.9963	3	399.99985	7969.99707	650.21409	1098.30016
Gide_PD1_Patient10_EDT	170.611315	1	29648.29258	207.99992	0	240.0004	16	2024.00386	807.99973	15	125.0004	164.6809	1	158	1260.99775	2235.00513	50	1481.0002	2	853	9	13017.9524	686.00031	716.4518	1432.0001	245.85545	4808.99359	1913.99655	15.017	325.00026	8351.9996	603.05577	2321.000256	28.99997112	2176.00006	2544.9987	61.00001	1741.0001	1617.0032	507.99998	1405.999639	1030.9996	432.0218	794	7	337.97814	3603.9955	504.6807	1588.6153
Gide_PD1_Patient10_PRE	139.4322	2.00000205	12657.37195	125.99984	1	69	2	1995.9963	730.99991	12	61.00002	181.965	0	122	1295.0017	1986.99644	83	1405.00035	3	844	15	7548.9958	901.66642	698.72988	1112.99932	303.9993	7262.9954	1993.99947	15.256357	200.00002	6245.0016	314.21282	1261.9959	72	1249.0009	723.9995	75.00005	5109.99396	636.00051	588.9996209	494.0002507	467.99968	407.99975	936	13	2274.9983	13588.99229	757.30108	1687.396879
Gide_PD1_Patient11_PRE	98.7801	1	12414.5846	6487.9926	0	503	10	1789.99603	2394.99734	53	466.0003	2176.17749	83	195.99959	861.00044	1514.00034	93.99998	1161.000888	5	515	3	4448.9984	838.71145	469.99558	943.99958	145.8269	1768.99856	1272.0003	25.7024	444.00044	7523.998	1197.00038	14816.0007	218.0004	1609.999692	1317.0009	795.0001	2565.0028	2942.996	668.0000419	3039.00218	1818.64042	614.99979	456.99974	81.99995	498.0001177	352.0001	303.13052	1298.00057
Gide_PD1_Patient12_PRE	626.5127	18	16489.36501	304.0000908	0	699	22	4021.0077	819.99994	14	124	0	0	623.0009	1253.99904	1939.00295	73.00005	1482.0007	11	583	54.00003	7464.0003	2178.0027	747.3301998	1417.99951	314.26479	6379.9977	1229.99784	199.6068731	354.99987	7763.004	360.99948	1242.9954	1630.996	1714.0006	5874.008	255.0004	3458.99861	1027.00004	597.0006	2827.999562	700.99978	1003.3042	1061.99986	0	2355.696399	1	729.61998	1447.0048
Gide_PD1_Patient13_EDT	218.8539	3	17288.12147	768.9997997	0	49	13	2759.00205	847.99965	2.000004	42.99999	1	0	521.00002	1475.002733	1519.00052	124.00001	2103.99997	6	779.9998	6	9930.0031	1154.00416	1060.71608	1384.00027	213.99992	5070.0007	3929.00385	43.50028	568.9998	9802.001	327.00044	1023.000024	162	1908.001691	477.99976	15	3403.00367	344.00038	660.0001836	3350.003921	427.889673	1118.31075	577.0006	9	1463.6893	2929.9994	715.16149	1639.66252
Gide_PD1_Patient13_PRE	159.1228	2	9972.16896	1212.00027	0	80	6	2305.00173	926.00028	18.00004	140.9999	0	0	584.99957	1204.0017	1192.0003	89.00002	1595.00037	2	675	6	7093.00235	906	600.32269	1217.9994	148.00001	5402.0048	2078.99926	41.50087	908.99967	5046.0026	245.99977	2160.999	170.00031	2329.000939	635.0001	39.999988	3501.99423	428.0000701	454.9997186	643.9998615	361.9997	231.2795	500.0001	5	1080.720871	2089.0004	539.1389	1500.2557
Gide_PD1_Patient14_PRE	153.1784	0	18176.4474	2364.99616	3	108	14	2524.0027	469.99969	0	4	0	0	192	914.99969	1892.99955	47.00005	1023.99976	0	536	0	11129.0021	1546.85446	520.89507	544.9999565	293.3824	6952.00336	2220.003	33.98786	597.99953	6914.0047	199.99964	469.00009	1130.99765	1582.99967	1189.9996	32.99999649	2271.99938	873.99988	791.0002501	411.9995158	784.00057	295.99962	576.9996	0	85	1738.0011	461.64324	838.54322
Gide_PD1_Patient15_PRE	436.7727	0	11917.64019	1529.0007	1	470.9997	34	2719.99534	658.00036	68	432	0	0	330.0005	501	1502.9967	138.99992	1012.0006	7	687	11	5899.99802	1534.83115	535.38978	1736.00067	107.99995	5030.99497	1893.00291	42.99995	214.00019	7842.9962	5853.35992	3841.997	1832.005	2102.999731	833	94.99999	5215.004968	4739.9969	476.999872	14622.0188	6401.1387	257.4225	564.0003	32	3198.58292	14849.0028	518.9973	1751.0018
Gide_PD1_Patient16_PRE	257.28793	8	48255.65157	56.999955	0	219	29	2608.00182	255.99984	25	12	2	0	1712.00317	695.0003018	2766.9965	107.00009	1005.00041	4.000005	395	13.99995	11500.0157	709.86672	687.3364	977.99997	211.66298	5762.0019	1933.9978	80.3722	528.99973	15742.977	925.99976	156.0005	693.00026	2886.004357	886	90.999976	1784.99999	5962.998362	314.0001059	8215.995653	3596.426014	182.9998	407.0002	1	1453.004441	47	270.07766	1584.0024
Gide_PD1_Patient17_EDT	417.67173	0	216757.1246	24	9	2298.9989	18	8171.99396	831.00027	7	3	0	0	578.99969	2216.99563	14406.99948	308.1693825	2554.9996	165	1040	22	26852.9607	2522.70151	1399.00045	3313.00155	1800.40749	11059.9964	3188.00202	299.47434	1290.88994	119355.414	1677.87755	93	4947.001445	8752.00885	1775	442.9995	8004.00147	23135.963	2551.99955	16678.12772	13658.4145	2571.3242	2089.9953	12	4494.672501	50.99998	975.74892	4377.12527
Gide_PD1_Patient17_PRE	153.5948	0	69228.76568	78.99997	0	370	8	2522.99923	400.00018	10	14.99998	1	0	409.999517	1154.0008	2556.00321	135.00002	2281.0007	5	943	18	12420.0347	1363.78777	954.23135	880.9999871	355.00021	4719.00073	2410.00068	151.74562	224.00024	19219.004	400.99963	230.99992	2861.0047	1780.00069	246	61.00003	1568.99969	2338.9952	353.000453	2989.000345	2990.58764	260.05412	870	11	3082.949059	40.00003	576.86833	1403.2585
Gide_PD1_Patient18_PRE	169.9815	1	30809.44256	1	0	130	20	3945.004703	793.99938	0	2	0	2	721.0003	1859.0023	3509.0048	105.00001	3010.997243	1	802	1	20168.9663	496	742.93376	896.99968	273.00004	5194.0033	3494.99894	642.34749	668.99999	16193.99	304.0005	69	186.0001	2008.004611	1448.99942	27	1986.00045	1148.9997	1099.99975	11700.99999	503.00001	239.0002	500.9999	0	2790.00265	4	592.834974	2326.39706
Gide_PD1_Patient19_PRE	273.2988	0	27374.04849	551.00037	1	70	22	3602.999	472.00057	1.999999	35.00005	0	0	432.00027	1420.002261	1437.9997	112.99996	1969.000002	0	1001	24	12343.0241	1872.80938	948.76999	930.0005724	314.00065	5298.0077	4074.99679	4	114.00002	6937.9983	62.10819	983	218.0002	1561.99899	108.0000151	6.99999	1691.00083	177.999552	439.0000701	796.9995	138.0002	62.47993309	823.9999	2	482.5193703	12313.99586	476.28387	2018.0491
Gide_PD1_Patient2_PRE	125.6081	0	73116.95547	6	1	508	17	2890.99559	489.99974	15.000015	35	0	0	384.99993	1086	3200.00399	134.99999	1499.9996	3	699	1	9164.00339	773.92692	600.7295072	1271.99991	245.75327	3584.00316	1879.99981	77.923709	515.00041	43989.98	1342.99975	16	17	1595.99932	744.9998	48.000006	1859.00011	4574.9976	676.00001	2528.996162	4399.81095	518.58426	629.0003	4	1225.41558	773.0003	187.030099	2059.33272
Gide_PD1_Patient21_PRE	272.3178	1	46668.82747	0	0	70	51	1523.00053	297.99975	1	14	0	3	1977.9981	1288.999604	3190.99954	147	1519.0008	8	572	15.99995	17410.9818	706.842	1074.1959	2318.0026	211.6637	7867.0031	2456.99747	206.73184	534.99966	40014.985	15032.99728	45	9124.9975	3527.998818	3132.00401	18.00004	5115.99952	58782.961	301.999592	47763.00053	9266.86997	1046.043957	647.9997	0	4391.9579	31531.90925	301.93958	2004.44284
Gide_PD1_Patient23_PRE	109.99887	0	118973.4963	0	0	242.00043	2	3023.00289	676.00057	1	2	0	0	356.99945	1437.9977	2420.99886	117.0001	2358.9997	6	793	20.00001	6726.99898	764.00019	600.0710919	802.0006	231.00021	4031.00016	1337.00109	57.23185	264.99974	14207.024	269.9996	25.00004	231.9996	6294.999844	2374.0022	15.999999	2093	3020.9963	462.0000313	4076.0049	1137.81781	807.036	324.0002	2	882.96443	77.99996	262.4119	1724.25324
Gide_PD1_Patient25_EDT	135.08294	0	30709.82186	2898.99829	0	237.9998	23	2125.99882	801.99972	36	467.0003	0	1	276.99999	914.9998	2890.0028	97.00009	1705.0002	12	663	3	7740.0008	852.86515	710.8542	1018.99999	216.00033	3832.99377	2170.99519	16.7054	579.00017	12243.988	308.99966	7485.9961	31.99999	1913.99975	580.0005	74.00006	2919.9957	1110.0001	839.9995315	289.9996873	643.85518	601.3753	743.00016	10	760.62513	30.99999	290.0138	1480.46976
Gide_PD1_Patient25_PRE	242.72945	1	63847.0974	308.00023	0	228.9999	10	3239.99796	715.00033	8	136.00034	1	0	458.00022	1019.9995	2422.9977	126.99997	2632.0002	3	970	2	10697.0328	1401.99754	997.9165555	1188.00002	319.000425	7362.9985	3329.00362	18.9719	504.9997	11537.972	289.00002	1213.99761	32.00002	2255.004892	816.9994	68.00001	3857.99591	1341.99559	727.999723	860.99958	642.00028	1191.03536	1095	1	3060.963104	571.99978	809.99394	1817.5595
Gide_PD1_Patient27_PRE	391.9433533	0	36386.94786	21.00000585	0	89	15	6754.00652	409.0004	5	6	0	0	553.9997653	784.99966	1838.9971	1101.039761	1613.99938	1	1618	3.000002	12973.0347	3929.6228	1073.6431	856.0005	229.51801	2109.99781	4029.00414	89.9832	154.99952	2853.0042	507.19427	141	61	2142.999351	3660.99856	1	5075.99977	608.99962	195.0003995	322.0002062	417.82658	90.24229	1059.9996	0	1330.75889	277.00074	935.99575	2255.80992
Gide_PD1_Patient29_EDT	365.4533	1.00000001	10518.62787	8	1	49	2	2675.00587	766.99996	2	2	0	0	302	1553.997568	1499.000551	130.00003	1080.999	18.00004	749	0	6791.0024	1777.84908	793.17302	1782.999201	279.99968	6430	2513.00254	104.14947	20.999987	12395.014	733.999933	27.00002	184.0002	928.0002129	1769.00092	12	11205.00223	903.00024	825.0002906	175.0000703	690.99989	65	601.0006	1	103.00005	7244.0029	420.56401	2017.6381
Gide_PD1_Patient29_PRE	600.13593	1	7483.00188	3	1	80	4	3722.00063	1059.00033	1.999997	1	0	0	315.99982	1134.00481	1576.9997	154.9999801	1550.99985	8	756.0006	0	9855.0018	2533.42	962.26627	1891.0007	227.51721	7149.0032	2927.00146	148.61806	34	16261.026	947.0004	29	478.99965	1329.999552	3167.00266	9.00001	10569.00197	902.00042	912.0003342	465.0000863	1148.0001	122	637.9999	0	78.00005	12245.999	473.2058	2111.3415
Gide_PD1_Patient3_PRE	216.73041	0	21385.4529	2269.00082	0	143	9	2911.000857	777.99944	52	558.0002	0	0	471.00023	858.9998	1735.99547	95.99997	2236.0005	6	538	0	8663.0037	1121.00285	675.54888	1079.9995	123.000052	3407.0022	2287.00395	57.1003	99.99999	8701.0001	473.31209	6242.004	628	1315.99922	868.9999	51.00004	4675.00081	769.9997	400.999957	612.00039	2474.747	198.58941	316.9997	15.00003	6816.416159	10042.00106	328.05953	1615.86683
Gide_PD1_Patient30_PRE	524.93689	0	50235.78524	23.00002	6	854.0005	16	4526.00021	1127	0	6	0	0	906.0012	3368.99543	13215.00068	451.00016	3674.9955	10	1293	59	94150.047	2553.59521	2467.16562	2049.000001	2111.7631	7732.9921	6286.998276	103.9324	287.9997	48917.051	551.99964	263.9997	26046.97088	1913.00172	11996.0008	197.9999	1031.99936	3058.0016	2706.99642	2552.353345	1172.646104	412.13245	2821.0047	0	7710.8652	2509.9962	1079.6784	5964.8062
Gide_PD1_Patient34_PRE	329.1255	0	35651.94653	8	0	87	67	1545.00019	579.00046	1	3	0	0	345.9997	996.0001865	2826.9939	56.99998	1249.99981	18.99997	1186	2	13657.9559	1057.80941	411.0155	1145.0006	244.325	2194.99643	1400.00389	34.25029	155.0003	10912.9682	207.00002	60.99996	233	952.9999	320.0002	23	3678.9926	924.00018	925.00015	3158.004166	1279.0016	339.0000019	708.9995	3	1267.99958	3093.0037	491.99425	1385.9557
Gide_PD1_Patient35_PRE	120.106	1	22472.0501	1175.00015	1	141	6	1872.99985	624.00015	14.999965	282.0002	421.891	8	255.9999	688.00017	1835.99671	60.00005	815.99966	14	243.9997	0	4733.0008	716.923	407.63147	1179.00015	111.99999	2483.99787	1478.99866	5.61596	256.0003372	7012.998	661.99963	9520.997	135	1180.00015	809	1490.00374	3426.00521	1273.99776	526.9999907	822.00054	803.99945	570.89726	454.9996	69	664.1026913	169.99988	199.01086	1335.94339
Gide_PD1_Patient36_PRE	140.7833064	2	61237.95804	2	1	93	10	2406.001252	301.99966	2	7	0	0	409	1695.9995	2182.9998	96.99998	896.00018	4	646	1	8047.0006	667.9999	553.96129	999.00114	201.8068932	3349.00305	1636.00376	14.413316	164.00005	9191.996	481.04	27.999915	338.9998	1276.99932	852.0005	108.99961	4165.99891	1114.00434	626.99996	956.0003	872.66656	258.9999	614.9996	5	245.99989	1729.0002	321.72848	1497.00016
Gide_PD1_Patient38_PRE	258.15437	0	24262.74525	2	1	180.0005	13	1672.000719	269.0001	2.000002	0	2	2	384.00021	1035.00003	3049.99991	88.00008	1488.00011	10	447	13	9989.00418	751.87	426.249775	580.0004848	135.83008	3137.997	1949.99532	111.55543	327.99981	15237.004	181.33075	41.0001	844.99971	1486.00023	1861.00391	40.000015	1058.00036	1018.00026	776.0005827	2120.99925	730.7161	764.66094	447.9999	0	7019.33534	130.99997	225.01127	1546.95087
Gide_PD1_Patient4_PRE	259.8647	1.000000037	140887.0098	1096.99961	1	1273.996	32	6934.9987	1868.00477	129.0004	193.00023	0	2	746.9995745	2801.9992	8953.00152	385.77753	2962.99927	12	1104	9	17496.9996	2811.3398	1090.037453	2636.00034	1415.76774	7828.00144	3270.0027	80.62696138	879.00033	68317.024	5129.64778	5678.0006	2885.004	4776.001972	2732.9971	210.0001	9251.9967	17667.0212	1486.99962	11365.61454	7890.3094	3515.50616	2033.0004	275	1796.49547	1616.0001	512.28892	5029.5757
Gide_PD1_Patient40_PRE	235.53527	0	45268.66823	0	0	229	36	1891.99578	366.00007	3	12	0	0	366.99985	1018.999914	3423.99982	57	1014.999	19.00002	377	0	14978.0034	755.9999	556.00069	1505.000901	164.0003	2768.00514	1978.00097	56.10605	707.00017	19900.97741	910.7654	65	367.99997	842.999183	647.001	11	1415.9999	3491.00039	569.000531	632.9998	4615.0002	671.0003	361.00002	0	3912.00337	10	340.97228	1804.1657
Gide_PD1_Patient41_EDT	54.89779214	0	147636.5596	9.999998	0	264	23	1852.99997	419.999918	54	4	0	2	272.00028	963.0003	2804.99878	118	1409.999806	2.000005	485.001	0	6575.9983	666.0003	546.2003004	1124.99961	211.99991	2797.00021	2096.99645	9.41096	411.00035	25018.966	1493.72944	38	29.99997	2117.00093	607.0006	149	1661.99956	4224.9986	452.00003	3942.001439	3392.82458	1121.76573	710	5	573.2382861	1198.0002	256.25009	1845.6581
Gide_PD1_Patient41_PRE	138.3913	1	208129.689	8	0	78	5	1801.000962	695.99957	0	0	0	0	397.00041	922.0003147	2669.00425	179.00008	1846.00118	4	685	1	13975.97818	934.00038	554.37466	1136.00041	390.9999	3344.99922	2924.99992	14.5379	128.00005	9437.004	271.99971	77.00001	18	1174.000507	1896.00052	41.99997	1655.99984	852.00009	668.99945	702.0003324	707.63914	137.80865	1034	2	235.1914311	1481.0002	402.1283	2312.25328
Gide_PD1_Patient42_PRE	228.15552	7	36686.45575	10	1	402.0003	2	3584.0042	301.0002051	4	5	0	1	281.00031	858.0001	2261.998	163.99993	1264.00072	9	846.00005	8	11855.9783	1013.88568	909.3591	1156.00047	168.00027	4291.9931	1746.99537	87.0552	296.00026	7507.0038	1958.99938	51	1846.99592	1771.999655	2577.0002	62.00001	3520.00014	3949.9989	402.9996249	5389.001665	2911.33704	510.138	939.9999	9	1448.86179	4720.9961	288.4851	1670.99917
Gide_PD1_Patient44_PRE	309.5426	9	48042.38712	7	5	258	12	2882.99587	372.0003	8	9	0	0	231.00025	963.99963	2756.99742	65	1357.000341	13	410	0	6610.9964	828.88482	513.84634	1348.9998	279.00027	2495.99492	1752.00373	84.678707	361.00024	18287.976	544.99981	128	1569.0048	1697.998737	653.99967	98	2237.00039	1459.00075	1057.99964	353.00008	1138.99925	1267.5188	523.0001	36.999965	1239.48168	139	246.84451	1887.00331
Gide_PD1_Patient45_PRE	296.67454	1	25105.96842	12	0	149	11	2487.99922	155.999953	1	28	19	0	151.99999	722.00015	2701.0026	139	832	3	441	1	5469.00206	669.99979	436.35231	1095	113.99998	4406.00238	2046.00309	31.31968	483.99986	22651.001	807.00087	149.00001	470.00035	2341	1315.0001	134.00007	4409.99949	1780.9999	869.0000001	776.0001762	1553.00058	3601.12451	526.9997	42	9844.86708	147.99991	128.36726	1382.00012
Gide_PD1_Patient46_PRE	205.538	0	16936.70341	156.00042	1	187	23	2656.00326	562.00021	15.00004	113.0001	39	0	211.00002	1254.0044	1829.001	108.00004	2015.00003	20.99996	752	3	11464.9634	1215.00005	817.3312084	808.0008	250.00011	5007.0032	2748.99975	35.7962	225.99996	10958.9828	512.00009	1658.0048	287.0003	796.9997595	996.0005	73.0001	3118.00557	1077.99976	464.9996902	718.0003987	662.0001	383.7214	660.0006	4	375.2790842	3655.0045	423.41051	1550.71066
Gide_PD1_Patient47_EDT	33.47546	0	118420.5035	128.99957	0	124	2	1378.99952	218.99991	1	21	0	0	261.9995	876.99981	2296.00482	182	452.00021	0	510	1	6149.9959	364.99998	502.00044	1890.000402	138.39197	3649.99937	2115.000338	57.8467	280.0005	21535.9741	1020.5588	897	629.0001	744.9998516	358.0001322	60.99998	5225.0067	2381.9999	257.0002857	2472.00068	2025.73214	2410.3747	562	26.99999	6308.62047	1496.0001	285.43758	1633.0534
Gide_PD1_Patient47_PRE	70.5751	0	104721.3175	41	0	475.9997	19	1800.99938	329.00025	6	28	48.8344	3	295.0002	800.99997	3186.9995	262	902.9999	1	559	17.00002	7251.0027	416	501.62513	1212.00078	193	3415.00587	2475.00169	27.872315	466.99959	24791.953	1287.69347	179.00019	141	1253.000459	720	43.99995	4445.31221	4991.0007	423.99954	3733.00235	4939.93826	807.26317	522.0003	11	1961.732384	2383.00415	173.10206	1670.4342
Gide_PD1_Patient48_EDT	143.1528	1	20658.11164	2	0	98	6	1722.9954	276.00006	1	2	0	0	99.99998	824.9995	2587.9976	44.99995	906.9994266	14.99998	402	0	5419.9988	619.84493	357.23523	887.99986	184.66552	1363.00043	1738.99778	6.999995	548.000101	22252.974	142	43	4	2625.001331	509	7	1275.00063	688.00029	867.0003302	133.999612	596.350486	1841.2425	556.000309	11	301.7537649	18.99999	179.05687	1383.05501
Gide_PD1_Patient48_PRE	123.49294	0	14016.8807	4	0	157	4	2490.004925	1041.00024	0	10	0	0	670.9995	1075.0043	2479.99944	115.00008	1810.99991	7	1236	0	10213.9967	1579.99834	817.050279	1169.0007	271.00011	4567.99605	2993.00407	31.540057	321.00025	13609.954	202.29996	64	20.00002	3455.00602	862.999312	14.00001	2064.0006	870.99921	1145.000451	169.00009	700.00006	1071.63478	562.0005	44	417.36611	8	392.32156	1561.0003
Gide_PD1_Patient49_PRE	281.1615	0	31213.58678	656.99995	0	186.9997	4	1507.000532	579.99972	5	59	0	0	298.00038	1095.996101	1906.9969	83	2011.9987	10	491	0	14196.0212	1105.99518	639.66645	904.00066	315.7091	3098.99993	2310.00173	34.69191	92	17846.047	278.00008	1561.00351	66.99999	2048.999581	161.000003	51.00006	5960.00648	807.00025	507.0000829	386.99981	486.93188	202.99984	804.0005	10.000003	222.9996122	3874.0053	356.33614	1433
Gide_PD1_Patient5_PRE	145.3789	3	17949.23161	21.99997	0	175	9	2110.99864	294.9997528	0	5	1	0	349.99971	1335.997455	3439.9962	181.00002	1591.9998	0	1272	0	12318.0166	1316.82889	438.4489679	1215.999983	381.4293	3754.99991	3210.99786	148.966	621.99957	3751.0047	322.99995	34	250.0004	844.000029	160	47.00002132	2638.00017	455.00013	713.000042	317	251.00015	150.21136	401.9996	3	601.78974	17613.0029	973.23504	2394.05819
Gide_PD1_Patient50_PRE	125.77642	1.999996	10918.32924	4	1	384	35	1682.0001	155.00011	47	7	0	0	398.00031	1368.99863	2712.9956	80.00004485	1273.0011	14.00001	702	6	11975.0206	646.669	973.03383	635.9997877	163.00006	2457.00588	4267.00211	474.0284	310.00026	10010.003	349.89921	44	690.9999	1429.00116	1109.0001	177.0001	1492.0005	769.0004	389.00027	316.0003	491.99994	2329.42405	241.0001	14	2156.5765	387.99919	328.76377	2194.66187
Gide_PD1_Patient52_PRE	186.7215	0	8101.15612	3	0	102	6	3874.000891	251.99954	5	1.999999	0	2	93	1479.999526	2120.99922	97.00001	1809.000001	5.000000351	837.00022	3	20909.0445	1402.99817	1126.70574	1160.00103	366.69562	5324.0051	2367.99887	59.20864	359.87496	13323.966	386.35604	131.0003201	45.00002639	924.9996771	262.00024	6	4728.99999	453.99965	780.0001199	4230.004265	548.8335	285.0005	362.9997	2.999998	396.9995539	15098.99295	313.9443008	1589.54379
Gide_PD1_Patient53_PRE	286.0943	6	9937.3057	9	4	181	12	3004.99775	284.99951	12	7	0	131	301.9997	505.99972	2817.99733	67.99998	731	7	847	0	6666.9959	2183.6979	733.6189419	886.0010421	111	2507.9966	1465.00382	26	835.00086	8629.996	1831.5509	15	21.00003	2673.99575	461	111.99992	1064.00018	2130.99733	1812.99591	6076.99951	3741.99628	1396.285	453.0003	34	325.71438	16.00004	244.1050007	1691.7001
Gide_PD1_Patient54_PRE	162.1374	4	24819.37947	11	0	43	8	1792.99963	349.99954	4.000004	24	0	0	241.00043	1065.0036	1721.00079	418.000127	1784	6	535	2	9567.0042	1293.8396	768.94397	732.0004104	195.00004	3055.99861	3187.9993	129.94	145	7621.0029	1062.99987	111.00004	149	568.0001821	781.0006	22.00001	3664.00358	787.0003	434.000411	78.99999074	1008.0005	510.94826	625.9996476	9	939.0513912	7184.00727	630.71127	1573.9786
Gide_PD1_Patient6_PRE	6	0	38703.09808	0	0	274	10	1595.00044	286.99962	1	0	0	0	194.99986	742.00014	2235.0005	182.9995	552.0004	6	315.99985	13.00001	6780.0039	485.494	597.6699	824.0003484	85.00005	1703.9979	2532.00158	10	378.00049	6079.9983	513.00039	110	880	1178	1428	14	4414.004	566.00031	566.9999554	399.99958	367.00021	2193.005	246.9999001	22	7589.998	1183.9997	80.30850005	1805.998501
Gide_PD1_Patient7_PRE	88.25306	3	42293.20269	1	0	64	11	1598.99947	194.99979	2	0	0	0	429.0004	1026.9998	2232.99412	101.99999	1451.00011	10.999968	478	4	9902.0016	844	424.99997	785.9998	272.99955	1391.9999	2590.99823	55.455327	269.00027	23899.028	200.2426	16	513.00003	746.9998601	1560	42.00002	1844.000498	407.99945	304.0002293	92.00003	272.99956	2876.804736	545.9998	0	2178.195864	415.9997	186.79739	1891.07318
Gide_PD1_Patient8_EDT	680.5584044	0	132330.2622	133.00003	15	526.9998	15	10888.99333	1663.9983	49.99998	78	0	0	2575.005	2778.00163	10076.99719	519.30355	2179.00046	17.00003	2956.9982	5	17623.9735	3724.8398	1815.78236	6806.000389	2374.0387	17537.9644	3057.00012	76.00003	2099.4096	66001.04	2640.86315	1395	524	1606.995753	3752.007	128	15122.00171	9125.00027	523.0001138	48897.2052	11403.69027	781.000403	3240.0027	22.99995	1684.003851	186.00009	1377.74263	10266.00377
Gide_PD1_Patient8_PRE	455.3054	1	26558.5645	264.0004522	0	168.0004	8	9135.99971	1834.99965	26.00005	66.99999	15.8841	4	1948.003654	2174.002	5005.00123	499.4265953	2406.99948	0	3246.9995	10	15400.9569	3798.12834	1624.15069	4922.00501	3043.0028	11744.0023	2688.99852	19.00004	2627.00311	11256.009	1184.33226	2452.999	267.00048	635.9998708	2620.005	215.0002	11301.99365	2031.0037	171.00004	8417.3973	8578.77636	208.2412804	2558	0	677.7588998	104	548.689832	9078.98478
Gide_PD1_Patient9_PRE	117.87856	0	64997.03454	17	0	348	25	2420.9999	580.99959	129	83	0	0	371.99983	809.9998	1433.99993	93.99995339	781.9997	5	344	5	5311.0025	494	767.01898	1889.000454	168.0005	2846.0039	1494.00217	176.1281	95	12344.953	1395	60	903.9996	1741.0003	707.0002	23	8858.99906	4995.0042	439.9999	25327.97071	2477.2742	865.49481	567.0001	0	2630.507321	3564.002	587.0811	1671.09522
Hugo_Pt1	946.4803	0	63595.63299	4.000005	0	1050.0003	3	2582.99864	758.00033	4.000003	6	0	2	426.00049	3242.0088	2625.00247	620.43323	11355.9925	5	3551.136	54.00004	17146.00642	1394.98802	1790.97163	851.00035	3311.7714	884.00019	5375.00326	124.0001	569.00029	1625.0025	114.00006	0	27.00001	5155.99801	5941.99821	11	414.99974	1048.00077	1372.999384	976.9999721	489.00023	523.63712	1951.003	2	61.36246	11805.0081	876.06601	1210.00013
Hugo_Pt10	533.1286	0	177419.4243	7.999998	7	4065.9994	3	2564.99493	2179.99943	1	0	0	0	1256.00417	2279.00204	2799.00107	396.3708	10868.9971	6	3340.9991	809	14180.95312	1475.948	2024.20571	552.9997	5320.6633	800.99976	5201.00147	2271.9372	625.75693	6912.00202	93.000002	1	3206.00293	15974.96708	3572.9999	20.00003	1489.99918	6391.00094	711.00027	120.999958	512.99991	80.00000052	2201.00368	2	728.99954	40.99992	2997.52825	1087.28252
Hugo_Pt12	447.5742	0	119298.3133	0	2	168.68445	20	1479.00054	3356.00575	1	1	0	1	697.9998	2525.0031	3166.99951	297.00005	4571.0023	4	2018.99783	130.00027	11506.02	1046.99921	1090.10545	537.9999	3275.6552	1775.00427	2155.004806	7031.778835	43.000049	2101.9986	66	1	408.0005	2663.999512	177.9997	3.00001	452.0000978	504.99983	790.0008073	439.00033	183.9997	209.16542	1467.00024	0	1628.834871	2	662.17435	403.99996
Hugo_Pt13	745.09481	0	184929.4015	0	2	1136.0039	30	1846.9992	755.9998	2	1	0	0	860.00052	2675.002837	2847.00471	852.00063	6096.9959	1	1944.00168	1055.0042	14523.97173	2224.00491	1620.7422	722.00026	3494.7012	1541.99668	4536.00003	591.16962	699.00025	8630.00091	100.00004	17.0000154	510.0003	5020.002519	1273.00347	19.99999	1179.99886	2870.0043	1431.000616	5369.9975	612.00025	250.99967	1073.99586	2	1759.00094	36	706.41299	998.38875
Hugo_Pt14	597.1068	4.000000495	18793.53553	0	4	590.43472	17	4186.99941	1589.99832	519.9996	0	0	0	31	3394.00297	4277.00102	1254.47356	8090.9971	7	4494.99866	2	17946.97609	1936.96429	1983.89002	738.99935	9954.7542	1490.000222	8124.00475	59.00000088	154	10005.00466	78.07205	0	15.99998	2802.99887	2722.00202	56.99999	172.9999735	362.99965	503.9992	944.00048	243.99975	106.99995	2558.99923	3	44.99995	8	1179.30258	2310.80489
Hugo_Pt15	1274.62841	1.000000088	37213.03189	0	0	98	7	1490.99933	523.9996	2	1	0	0	114.99992	2153.99977	902.0000935	602.00062	4359.0007	3	2638.99651	168.00006	4009.99763	1923.99516	1232.06518	484.00007	3175.9142	853.00019	2361.9983	329.995	74.00004	1702.99782	62.07137	5	94.00001	1079.99965	2029.00078	131.00001	1063.99996	55	649.9996182	59.00001	68	121	2280.99889	0	632.9988852	5598.99417	1986.98406	793.85389
Hugo_Pt16	646.9409	2.047280016	36204.60132	16.00004	0	229.00002	0	937.00007	839.0001	4	2	0	0	30.00001	1689.0002	3166.99583	327.00043	4234.00531	12	2306.5858	19	8889.99634	1242.99519	690.29553	265.00001	1434.5217	436.99956	2948.00304	588.3023	512.70016	1942	6.00857	9	86.00000032	974.00004	155.00015	40.999966	530.00043	43.999935	615.9999204	5	4	265.88021	301.00005	0	267.11955	3152.99693	828.7181	735.99983
Hugo_Pt19	642.9494	0	8298.28952	0	0	409.80052	0	2435.00136	1056.00004	0	0	0	0	51.00000096	863.0002	689.0002694	523.99988	7208.999	0	2586.99857	1	6381.99696	1750.00089	1085.1754	99.99999	618.00005	285.00026	3744.99807	992.9024	50	130	12.000001	0	0	1907.00032	2299.000449	3	301.99973	34	738.000719	60	28	26.00004	385	0	114.99998	584.99979	3910.42007	115.9999981
Hugo_Pt2	22442.4484	4519.901729	72390.81815	3	1	31	6	1268.00092	325.00001	2638.002	0	0	0	589.00038	1195.000521	711.999697	527.00028	2697.000283	1	1176.00134	0	4534.00436	1100.96629	1321.679812	430.0000401	1071.768403	625.99979	2253.9983	492.94416	11181.02906	1924.99691	47.99997	1	16.00000046	3998.996708	1291.00143	9	1045.00013	1487.99534	279.0004624	1070.99971	525.99971	693.0001	1175	848	2125.000697	18759.0081	703.47547	976.99964
Hugo_Pt20	523.00007	1	16809.67069	11	0	125.99988	1	970.99999	366.99987	0	2	0	0	37.99998	1400.00024	1312.99771	478.99989	3722.0031	4.000002	2011.99726	9	3148.00441	853.00006	676.75359	430.99962	1212.998	398.99968	1121.9955	350.6236	150	1997.99762	175.35256	2	0	1824.999784	284.999494	2.000004	2442.6494	64.99991	704.0006723	51.00004437	111.99999	348.86464	1219.0018	4.999997	30.13538417	1490.99968	574.76172	690.474479
Hugo_Pt22	415.0704	0	52375.88298	13.00000591	1	915.00012	5	2270.99998	1300.00421	18.99999	0	0	0	229.00001	2699.00414	2962.0041	929.00103	6632.003	1.999997	3033.9966	51	12911.95678	2497.99995	1738.53557	651.99988	3022.8693	1311.00354	4240.00398	488.4456	389.00008	9496.00487	227.00009	19.00001	96.00004	1664.999929	432.0004875	23.000031	598.999773	842.99986	945.0000831	1182.000253	789.99999	295.99955	1512.99554	1	179.00001	1270.9998	1504.962535	1080.99953
Hugo_Pt23	559.13272	0	56572.23105	2	0	370.00013	4	1535.00015	1214.00041	0	0	0	0	535.99961	1448	3237.99671	942.0005	4221.0024	3	1510.001	102	4564.99675	1209.69816	1055.27129	353.9999	3092.98592	769.99973	3352.00028	389.52247	248	2935.00303	153.268126	17	383.99977	2860.99929	380.9998617	13	1010.99961	43.999951	803.00003	21.999969	100	197.00019	1034	0	284.00003	3375.00192	1875.416666	801.43605
Hugo_Pt25	1272.67731	0	45283.49933	2	0	174	0	2450.00469	282.99996	1	0	0	0	103.99997	1333.00049	780.9999395	1101.00028	4501.9998	0	3108.00351	6	6360.00355	1132.00133	1383.81132	328.00036	1255.97731	107.0001001	4080.99862	650.60678	54	992	28.533105	4	4	1377.99996	482.9997	0	257.46673	47.00001	466.9996854	54	51	55.999954	468	0	28.999984	195.0001	1657.55157	362.0000326
Hugo_Pt27a	438.8765	0	118722.1799	16.99999	2	186.51287	0	2519.99791	1499.99839	0	3	0	0	22	3199.99566	2817.00251	560.36735	5616.00347	4.9999949	2680.9956	1	9679.0005	1691.00314	1187.36796	1084.000161	3296.7735	1309.999962	4808.9979	136.00007	689.0003658	4741.9957	233.016927	11	17.99996	4761.00432	4340.00225	3	6339.97672	210.00034	864.00031	1897.9954	3797.99722	183.51139	2596.00022	39	121.4883559	8065.00068	790.8596	1684.82993
Hugo_Pt27b	469.2523	1.00000012	98892.56872	4	7	88.99998	2	1853.0001	1192.9998	0	4	0	0	16	2276.9976	2032.99957	511.21704	4675.0007	2	2695.99923	1	5704.99816	2052.8575	1091.76434	1198.000584	3432.9531	2073.001016	3721.99685	123	915.00014	4810.00468	398.6301606	12	28.999958	5918.99831	3459.99646	3.999998	9691.79565	73.00002	793.000751	11602.00152	4618.00465	98.00007	2654.00362	17	85.99999012	8981.99668	721.11855	2044.78151
Hugo_Pt28	366.94519	61.76156	8441.60828	21895.01023	1	276	0	883.99981	1743.00376	350	1861.004	1	0	33.99997	1935	1226.99527	254.99914	4033.0026	3	1240.9967	5	2586.00365	564.99962	989.60026	428.00035	1210.99774	636.99998	1864.99701	63.99998	210.00013	2080.99844	80.00002	9253.9962	14	490.99979	107.0001636	31.9999608	797.999916	65.999999	952.99948	73.00001102	28.00003	101.9999613	775	19.99996	46.999931	254	898.63777	620.72527
Hugo_Pt29	398.3478	2.999995063	130467.0474	3	1	163.9216	1	1471.9998	867.00001	77	0	0	0	208.00014	3173.00348	1529.99582	496.63931	3338.9972	2.000003	2493.00083	52.99999	5955.0036	1524.94982	890.73081	687.0006	2196.9499	1706.004656	2052.99919	409.374026	284.00026	3218.99629	133.19364	2	14.99995	3048.001368	7818.99852	9.000008	2245.80749	286.00038	1599.002635	515.00076	247.0004	339.0002139	1379.99871	1	158.0000131	11782.0055	1095.49527	940.44487
Hugo_Pt31	543.50023	0	8034.03611	1	2	520.98768	0	1314.99785	842.00032	0	0	0	0	75	1343	4233.00191	301.9975	4772.99637	0	1873.99748	93.99999	11630.98404	2113.95111	1197.18474	91.99996	360.988858	90.99996	5680.99636	146.976674	59.00005	293.99963	7	2	4	779.0002887	176.0002308	6	112.00001	18	167.9997803	4	22	183.30965	66.00004	1	824.69008	1847.99484	1081.50452	359.9997544
Hugo_Pt32	563.8283	1.00000017	20692.65921	2	2	1609.9998	0	1582.00064	624.08911	0	3	0	0	508.00046	1491.00063	4300.00437	478.76793	3933.0059	4	1782.00512	334.99957	4538.00442	570.92895	1094.91631	482.99994	1448.8764	338.00002	1636.99921	159.9998	56.99998	903	737.84873	12	38.99996	1414.000892	72.99999	99.99996	709.53438	1088.00039	618.9996198	4173.83628	391.49003	145.61122	393.00034	2	123.38874	27.00006	893.57509	511.99955
Hugo_Pt35	678.5529	0	13444.12842	0	0	120.00001	1	1356.999674	816.00025	0	0	0	0	118.99975	3826.00322	2721.99906	338.755	6822.0023	2	3228.0007	5	9602.99756	2589.94802	1929.80119	271.00018	1702.676	615.99978	4604.99851	1396.86842	69.00002	1175.99909	65.27415	2	68.0000139	929.00009	222.0004476	24.00005	2588.00502	69.00001	271.999878	11	64.99999	94.34779	806.99955	0	140.65224	1594.9992	2559.62969	901.27801
Hugo_Pt37	631.69109	0	6730.4373	0	1	66	0	1523.99886	219.99975	0	0	0	0	120	1928.00078	2415.99577	960.873	4252.9971	1.999995	1783.99628	59.000035	17406.95737	1078.99316	2219.92239	573.99976	1537.41964	171.9999	6099.00076	974.66371	67	78	20.00000338	12	10.00001	6636.00103	3490.00343	1	1001.9994	15	840.999901	8.000004	31.000003	26.000049	178	3	129.00047	509.99974	2842.3382	1271.000736
Hugo_Pt38	234.64734	1.000000227	98763.16675	0	4	493.7414	1	1487.00144	930.00048	0	0	0	0	49.00002	2217.99877	2822.00182	284.99658	4059.9947	10	1630.99831	88	5619.99951	994.87371	867.80944	593.00007	1817.6089	252.9996	3757.9967	129.9466901	693.90887	716.00013	20.0000014	0	0	2384.00006	1239.99913	13	604.0008	799.00008	2157.998864	257.00037	49	341.74419	618.99986	25	999.25531	58.99999	658.32749	1204.111047
Hugo_Pt4	634.9148	0	20536.00111	5	1	78.00001	1	2231.00364	444.9997	9	0	0	0	250.99998	3325.0033	1463.00338	995.334	7373.004	0	4508.9994	6	11078.01684	5629.946	2447.62489	445.00074	1177.9384	272.00009	7342.00491	669.15412	228.99994	2684.00346	16.000003	21.00005	27.999968	2581.00244	5716.99797	4	495.99994	41.000048	282.0001083	515.00032	96.00009	70.00004	825.99957	1	102.0000003	19050.00574	1766.52615	985.15698
Hugo_Pt5	860.01426	0	12741.97456	0	0	95.99997	0	2666.99503	2012.99638	0	0	0	0	463.00042	4879.0029	1684.00439	1123.00031	7265.0002	0	5044.99604	1	30866.0332	7287.0948	1414.60146	902.0008844	2019.82063	757.999616	2242.0051	38.61878	820	193	7	8	151.0002	2351.996437	3200.00259	9	535.00063	9	1309.999673	37.00002	31.000085	102.99998	2865.9995	0	14.99999	11892.99443	873.07537	1635.00139
Hugo_Pt6	210.40357	1.999997	40975.43416	0	0	172.00026	0	2135.99644	1710.99642	0	1	0	0	261.00044	6196.002	2582.00242	692.99949	7970.999881	3	2285.0003	2.000001	9879.00321	4106.8112	3573.27415	775.9993	3448.7363	3566.00035	5217.000679	2033.8902	560	6082.99549	21.000009	89.00001	138.999677	2338.997477	2938.99577	8	425.00048	20.00002	637.0000266	71.999991	19	1386.28676	873	2	2282.71441	5907.9957	1113.76257	2484.00318
Hugo_Pt7	977.991	0	8825.37184	1	0	93.99996224	1	1214.00001	973.99979	0	0	0	0	118	1801.001	2132.99742	848.00011	4692.9959	3	2943.99706	1	8728.99973	755.00011	986.9132	432.9994	1415.9094	433.99973	2243.99557	261.70391	211	2149.99926	84.99997	4	25.999972	3020.9923	2982.99791	9.999995	1810.0003	34.00005	1437.000402	38.000043	13.00000004	13051.01104	1209	0	1286.993917	17	1237.60003	678.9994315
Hugo_Pt8	277.4348	1.000000156	12984.51039	5	0	219.0002421	0	894.9996131	546.00009	0	2	0	0	77.99996	1080	1301.00422	174.99995	2868.0009	0	1251.9996	38	4610.99985	484.00043	663.12469	249.99964	625.8695	727.00018	1383.99693	239.0941	247.00009	868.00025	144.99996	4	6	1709.000283	762.99956	0	1463.99975	80.00007	196.000012	1016.99969	149.99983	241.99992	771.99953	3	191.0002816	2883.99832	540.765385	568.0006714
Hugo_Pt9	654.3898	1.000000069	71570.14772	149.000018	0	480.9724	6	2227.99705	1129.00021	59	3	0	0	314.00012	4655.99516	2151.001371	929.9997557	7896.0017	1	2917.9966	270.00009	14317.99031	1677.98608	1701.28135	874.0007	7153.7091	1485.00091	3871.99772	562.0896	239.0001422	1939	250.00014	1	480.00045	2033.000132	1517.99815	3	2612.99927	1108.00031	450.00031	1682.99992	455.574	137.00006	1792.00003	13	113.00001	130.000035	758.2913	2165.74691
Riaz_Pt1_On	322.9375	0	25131.2312	3	0	33	7	1513.00025	1763.99967	0	0	0	0	66.00000001	5384.997938	2152.998	463.9999	4121.0013	0	1480.0045	2	4485.99596	896.971	844.99954	1074.999861	1382.9223	1222.00079	2288.00183	974.89055	199.00031	2326.99937	38.33527	2	6	1256.99989	88.00002	86.99998	2436.00023	86	613.999846	177.00008	64.99997	2850.5991	2041.999	2	275.4049	239.99962	970.14816	1201.4205
Riaz_Pt1_Pre	324.43762	1.000000032	32395.29357	4	0	70.00000055	5	1110.00014	1096.00046	0	0	0	0	38	5128.00791	1942.99763	397.999714	3375.0037	1	1661.999	4	3424.00412	505.00035	702.0003	897.0006581	1907.002	619.0011002	2125.00499	714.60937	274.99983	3785.00192	80.3423	0	2	602.0003855	175.0003	30.00001	1367.0001	179.00034	454.0000317	225.000109	148.99993	1356.06116	1827	2	826.9395622	549.0006	495.00698	1098.70134
Riaz_Pt10_On	112.7584	0	39992.10543	6	0	103.0000002	0	1283.99999	554.99977	0	0	0	0	423.9997477	1828.99777	2006.00405	366.00011	4731.0016	2	2356.83742	13	6301.99991	1226.96684	658.29166	773.0002282	3350.8454	875.0003	1335.99748	391.51259	209	6630.00117	80.11275	12	8	1069.999228	102.0001	5	1127.99979	114.99995	164.9995805	4325.0037	212.00003	80	2260.00353	1	51.00003	7130.0014	1123.56127	989.0006
Riaz_Pt10_Pre	177.8609	0	19405.8009	5	0	48	3	2457.00186	863.00002	1	0	0	0	841.0005	3140.0039	2214.00397	590.95593	9189.9932	2	4264.999	31	9817.99771	2601.68431	1094.9998	1295.00073	6304.8619	2037.0001	1837.00006	983.9087	82	6432.99787	108.46785	11	0	2107.99994	102.0000002	0	1821.0006	180	145.000429	5688.00355	722.99991	92.00003	4219.99611	0	42.99996	15498.0178	2765.67045	1779.62204
Riaz_Pt101_On	156.8178	0	22652.73859	0	0	491.0006	0	1805.00168	939.00069	0	0	0	0	32.99995	2517.996621	5387.0015	259.0004	3696.0054	8	2255.99977	75	4800.9973	956.911	1017.00039	1011.0005	2937.9974	527.000187	3064.00285	84.00003	1208.93566	4060	89.07641	0	6	2211.996599	1341.997714	28	1264.99995	1062.00012	2548.00378	225.9999	246.9997832	1310.40011	2182.0045	90	1130.6018	1	138.82594	1437.604788
Riaz_Pt101_Pre	191.75113	0	8782.476	0	0	361.8623001	0	1469.00015	682.0005	0	0	0	3	22.0000415	2492.0012	2792.99725	185.00006	3317.997738	8	1991.0037	103	2690.9984	744	866.53443	856.9995084	2673.6298	292.00009	2290.99975	129.99962	1120.00514	2387	38.99996	2	2.999999	1568.999993	826.00003	14	660.0008924	1027.00081	2420.00329	92.00003022	78	904.06093	1667	58	1108.939537	17.99996	239.54403	990.9996529
Riaz_Pt103_On	506.24512	0	17591.51549	429.99988	0	211.00038	5	1780.99979	678.0003	25	249	8	0	210.0000316	2070.00019	885.00021	465.99356	2734.0001	2	1351.997	3	2967.99929	1942.94388	959.59512	580.9998	1972.746	988.0003	1651.9954	670.92038	211.00013	1928.00059	98.11367	228	17.999968	2220.997365	1043.99959	27.00001	2107.9993	254.99954	783.0006595	350.99973	141.99997	54.12501144	1471.9998	3	907.87529	8763.0051	349.80367	627.9639427
Riaz_Pt103_Pre	987.9996	0	24884.4624	67.00001	0	659	0	1399.99984	578.0001	69	198.9999	0	0	177.9999	1241	533.0001	1076.9532	2332.00319	0	1229	71.00003	1484	405.00022	913.06209	240.9997	693.9998	172	1141.99962	121	240	1900	190.999697	180	45	606.0002063	278.9995	22	314.99965	469.000221	299.0002	416.0002	163	74.9161	732.0003	0	145.08429	554.9999	186.3948	559.9996
Riaz_Pt106_On	165.9111	0	34667.44042	2	0	219.0003288	0	1681.99972	583.00021	3	3	0	0	93	4009.996	1412.0004	282.9996901	4426.0024	0	2123.00294	3	11584.96117	2339.9136	1253.98392	760.99978	3179.3934	830.99969	2266.0039	51.08441	75	841	98.00005	7	52.000002	807.9998579	1330.00378	1	660.9999811	526.00091	521.0001332	2023.00416	785.9993	177.7515477	2237	13	25.2482	9812.0052	716.473943	882.97244
Riaz_Pt106_Pre	157.3323	0	55047.88736	0	0	304.0005	4	2114.00121	662.00037	0	2	0	0	124.0003	4232.999401	2318.001179	374.00005	5018.9996	3	2453.002	0	10949.97471	3262.7259	1211.521105	930.9990453	4402.779	1411.999	2694.99503	79.99999	159	3080	459.14366	7	146.00005	1136.999775	854.99978	8	966.00008	1494.0013	812.00036	2881.99928	1713.99574	319.840111	2958	17.00001	81.159894	12906.99826	1085.89216	1133.69861
Riaz_Pt108_On	315.21691	0	40798.7961	0	0	1639.0035	3	779.00039	500.00037	0	0	0	0	100.9999368	2769.005	1595.003	375.00052	2080.99907	0	959.9999	23	2994.00257	280.854	1064.67787	438.9999	2619.8033	425.99971	1384.00444	338	822.00019	1952.00056	6	1	0	1547.0004	969.00019	2	39.00002	146.99997	271.0002696	191.9998828	19	54.04508	904.0003	0	55.95496	0	212.1915	442.00029
Riaz_Pt11_On	57.97778	3.000000034	69426.02953	4162.00425	0	101	2	1159.99981	1401.9956	56	734	0	0	494	2482.9965	3149.0038	493.99966	2539.0042	5	1479.92548	14	4196.0037	648.943	904.4471	514.99999	3225.787	948.999397	1753.00407	71.7054	249.4274	4470.9973	176.00006	2532.99745	317.0002366	489.99959	446.00005	40.00001	2751.0006	523.99993	417.0001	435.00034	383	172.00018	1579.99972	15.00004	276.9999	15.99995	188.51818	960.0004
Riaz_Pt11_Pre	56.08417	0	93225.10758	5502.00109	0	108	7	1198.00017	1848.00298	86	1146.001	0	0	391.00063	2613.0075	3376.00126	391.99637	2782.9986	11	1953.002	68	5647.0001	779.97461	870.83984	583.0000003	3927.5078	864	1890.00168	58.606739	253.99966	4480.99842	231.386273	2869.99664	258.0000738	663.0000707	661.9998	18.000002	2149.001029	620.99988	369.00001	791.9995013	467.0001	234.05022	1922.9981	8	319.94941	53.000051	241.91154	1015.204901
Riaz_Pt13_On	56.71413	0	48556.27816	9	0	100	9	1527.000822	769.99974	25	0	0	0	444	2830.00113	2565.00288	242.99952	3475.00374	0	2258.00405	61	6860.99721	888.90268	1133.35586	1104	2342.8877	2184.00037	2052.00466	730.28193	456.99994	5113.99907	149	3	12	563.0002547	246.99971	6	2046.99892	608.00023	260.9994747	475.9997507	3013.0051	454.0003008	1546	3	124	9723.0056	473.84698	870.99967
Riaz_Pt17_On	135.53039	0	18427.29209	6	0	21	0	2227.003287	1345.00198	0	0	0	0	100.99993	2212.99618	2713.99649	413.997	5743.006	0	2480.00375	181	4034.99703	940.95344	1379.99623	1251.99965	2359.6286	782.9993	2181.99938	205.999851	251	1443	45.70773	1	32	1321.00007	124.99999	0	1264.99987	51	132.000025	93	52	19.1077806	3245.001	0	440.8918	19062.00352	1140.56432	1323.9999
Riaz_Pt17_Pre	105.0799	1	21878.41663	5	0	46.80430006	0	1543.995514	1353.99657	4	0	0	0	97.00002	2445.001447	3197.99946	364.99645	4961.005206	0	2551.0039	115	4206.00079	944.93154	1443.854432	1176.000182	2723.787	895.0003	1947.00141	169.9982441	356.932	1376	39.99997	7	29	1106.00007	82	1	1095.9998	87.00001	161.00009	210.7696983	68.22989	28.15258	3733.9977	1	473.84801	19183.99988	1113.74418	1207.99974
Riaz_Pt18_On	83.87032	4.000000342	29543.20601	0	0	459.2896072	4	1497.00015	660.99974	0	0	0	0	85.0000237	2070.99997	3324.9982	180.99995	2733.000802	13.99997	1624.0049	75.00004	3822.99841	641.90858	731.71965	929.0006878	1910.9959	357.9995	2002.9975	26.999984	1294.9978	4187.00389	206.4548	8	3	1584.00066	725.9997201	30.000029	1175.0002	987.99973	2016.00268	417.99982	434	826.18695	1506.99939	89	424.813	19.00003	250.36202	1078.99992
Riaz_Pt18_Pre	77.68203	2	48822.33686	0	0	156.0001	0	1102.99992	1033.99962	0	0	0	0	38.00000953	4207.995823	3709.0029	334.99963	5639.999702	16	1507.0047	63	5927.00013	574.98198	774.434227	789.0000461	2830.7573	1353.0004	2685.00373	17.76334	647.0001	2211	87.99997	8	111.999936	1714.999563	1652.00463	59.00005	1001.9996	535.9998	709.99963	114.99997	73	368.38358	1985.99701	13	397.6162001	6	624.0037	1334.9996
Riaz_Pt2_On	45.92431	1.000000034	14994.7174	0	0	78.00004	0	1252.99984	1083.00005	0	0	0	0	227.0003341	3080.00448	1479.00377	214.0003	3364.996	1	1782.99918	0	7924.99668	784.88109	717.9994	710.0000004	1849.984553	624.99973	3050.00306	138.62353	80	4706.99772	13.0583	45.000037	10.99997187	565.0004723	1237.004332	2	175.999986	324.99995	275.0005011	3	247.99986	106.471481	2188	0	42.5285	33.99997	466.403387	872.9756
Riaz_Pt2_Pre	34.99999	4.000000182	22355.31724	0	4	186.8815	0	1446.99988	1203.9994	0	0	0	0	216.99985	2930.99945	1905.00006	232.00042	3760.99762	2	1696.99649	1	7069.9997	914.946	781.3908405	568.00005	1682.9094	640.99983	2933.9988	59.99999	103	5100.99738	15.353864	26	4	705.0001044	2888.99572	26.00005	199.99993	334.9998	438.00009	36.00004	245.99992	109.34105	1803.0045	0	67.65893	44.00002	433.6116312	1051.67538
Riaz_Pt23_On	97.13954	1	15445.78707	8	0	390.7838	0	1792.99997	974.99975	2	0	0	0	96	3316.99341	2402.99797	133.00003	5201.998	1	2168.336	69.99998	10161.00615	716.98077	667.3933	560.0003001	1991.9922	644.99991	1860.0052	178.6279	530	2068	60.32407	0	16.00001	1691.00132	803.0005	6	1056.9999	192.0001524	662.000533	207.00047	200.999679	211.76443	927	0	127.2352	434.00003	797.15462	1044.0766
Riaz_Pt23_Pre	78.77921	0	44383.7852	6	0	713.3149648	7	1479.00044	1174.99971	1	0	0	0	268.0002	2246.00357	3968.00253	222.9995206	4260.0022	0	1827.002	157	6341.00305	449.999	662.03885	588.9997648	1809.998185	406.0005	1827.99639	1469.393101	387	7994	288.2418	0	191.0001832	2750.000027	1455.000512	16.99997	827.27438	899.0003	753.00002	1876.99556	1004.00003	248.00001	1388	0	30.00005	7	486.95478	784.6727
Riaz_Pt24_Pre	139.15207	0	43613.88554	0	0	167.9996	6	914.00026	385.99957	9	0	0	0	45.00004	1738.001	1472.99577	399.90946	1956.998977	3	1317.00437	10	4583.99862	286.993	549.00029	677.0009	1747.9367	123.00011	1199.99516	34	482	5472.99887	145.82411	0	8	353.00041	235.0000042	4	968.998828	369.0004	167.9995586	805.7688973	234.2317	173.12452	1667	15.99998	236.87592	29.99998	173.64033	1061.97566
Riaz_Pt26_On	46.38151	0	6218.54035	1	0	19	3	1916.99986	724.00032	1	0	0	0	41	1838.00227	1448.0029	551.99986	3695.0006	1	2007.003	12	4648.00286	827.91653	1099.59518	1118.999819	4054.4658	1041.99921	2093.99562	270.41656	364.99962	1660	432.71056	6	2	293.9998182	1788.00426	4	4081.99533	1166.9999	41.00005237	1773.99776	1410.00011	93.826896	1693.00083	0	23.1731	47.00002	437.4954	1344.6005
Riaz_Pt26_Pre	48.21266	0	6389.21743	0	0	13	6	2061.0006	709.00056	8	1	0	0	73.99998004	1646.000656	1498.99917	570.00042	3726.9966	0	2318.99616	0	4388.00336	869.8473	1225.02156	1182.9996	4333.7415	1036.99998	2043.00048	255.08775	395	1154	367.40008	1	9.999999	373.9998888	1385.002326	1	3946.80191	2574.9995	68.99997542	1063.00028	2206.99888	38.61524	1684.99837	1	25.38474	109.99996	385.11343	1253.46458
Riaz_Pt27_On	190.6131	0	8544.15784	0	1	132.9996	8	2138.99958	1955.99491	1	1	0	0	97.99995	2272.99953	2756.99873	559.97004	3196.9979	0	1691.143	0	3264.00422	466.99933	622.3076	349.9998687	1508.4691	299.000172	1744.9985	131.99996	207	5515.99672	38.72053	0	206.9998481	1860.998675	1368.0032	263.9998	1025.8749	78.00007	1005.999988	260.0004	55.00001	3874.18772	1723.99605	0	1647.811997	12	510.3622	1020.99991
Riaz_Pt27_Pre	109.8698	1	5007.2234	0	0	41	0	1927.99971	1273.0002	0	0	0	0	21.00004024	1858	2245.0039	652	1927.00031	0	1540.99662	0	2161.99922	176	620.99961	512.99977	1400.9954	134	1152.00249	142.99992	219	3250.00459	49.00005	0	601.99968	820.9998924	873.99988	261.99995	1328.0004	116	561.99926	454.0002	55	7285.33906	3182	0	1478.665002	1	411.45103	1204.00258
Riaz_Pt28_On	69.78246	0	17938.56349	3	0	113.99999	0	1438.000411	500.00038	0	2	0	0	74.99993	4401.0001	3470.99616	2958.11283	2217.998804	10	2861.998	200	4331.99619	886.85819	819.624257	553.00023	1833.0044	311.99962	2654.00075	440.19651	314.3821	3327.00218	77.507832	0	1	2426.999664	819.0003	2	1049.0009	322.00012	755.9996703	356.00032	281.999819	890.4183	1246.0015	4	521.5824421	125	635.906732	830.6823
Riaz_Pt28_Pre	41.00001	6.000000792	12822.09313	3	0	43	2	1404.00067	447.00011	0	0	0	0	236	3586.001	3050.0014	5770.704	2288.99905	10	1600.995	127	2202.99703	561.697	797.68208	867.9989116	1827.0001	798.99986	1705.0034	758.6492	181	4560.99985	57.18194	5	17	2018.001593	244.9996	13.000004	1422.9997	142	621.0000439	125.000042	72	186.000267	1198.0034	0	924.0002154	201	495.74158	842.3159232
Riaz_Pt29_Pre	80.0044	0	68817.3091	0	3	76	8	1993.00164	903.00023	88	0	0	0	587.0002401	2288.998401	1889.00018	219.00045	5014.00132	0	2051.09244	199	8502.00041	789.98899	1137.46287	765.9995	5741.163	1177.000111	3168.00051	105	242.0000055	4567.99889	75	0	15	610.00006	3920.99583	3	1340.99959	117.99996	267.00026	276.9996437	73	66.00007	2208.9951	2	114	65	324.32153	1495.00154
Riaz_Pt3_On	89.77422	13.00000016	22125.51283	0	0	266.0003	1045	1404.999406	1227.99559	2360.99972	0	0	0	310	2720.0032	1480.99513	726.0000901	3936.0005	9	1929	35.00004	2423.9993	512.00029	1206.92285	418.0003108	1798.7403	233.99993	1889.00442	485.52	389.99961	2002.00355	56.41462	23	10	648.99928	130.99993	105.000021	1501.99982	66	186.999921	198.00013	5	147.8178	1424.99684	0	300.18206	1817.0001	660.9381	883.1858
Riaz_Pt3_Pre	58.6894	0	14360.61377	0	0	85	0	1749.99985	689.00003	6	0	0	0	329.000424	2898.9993	1763.0024	572.61581	4071.0059	0	2367	70	2497.00189	1033.6823	1567.03428	644.99962	2249.9082	445.0002	2911.99734	773.3864173	49	1993	80.0885	49	21.99996	1293.00024	170.99975	106.999978	2347.0008	39.99998	312.0000938	7	38.99999	124.0004	2245.9985	0	257.0002391	2834.9955	918.8619	1028.9331
Riaz_Pt30_On	106.43348	1.000000145	79828.77691	10	0	298.0000663	17	863.99962	450.00017	0	0	0	1	101	2016.00423	3754.00153	315.99981	2308.00318	3.999996	1394.00031	3	3321.99685	431.97039	497.86514	569.0007988	1621.9399	152.9996	1774.99672	77	748	19002.04384	24.28859	0	0	1995.99617	215.9996	11	451.0004	263.00029	1021.99946	191.999954	199.99994	706.8933912	1457	0	41.10675	178.99996	139.11534	971.99965
Riaz_Pt30_Pre	85.96398	8.00000166	5457.22418	8	1	11	12	2080.00001	598.99972	1	0	0	6	572.99946	2269.99847	1634.00068	701.00058	3850.99987	12	1469.99969	127.00023	7888.99762	617.90775	1374.24179	863.9996594	1383.9979	1045.999573	4660.0015	47.99992	97.00002	2445.003	188.72041	2	155.00031	1241.999827	806.00008	4	2041.99989	59.99999	282.0002815	64.000002	136.99983	176.6966	1169.99917	0	2763.30238	44.00003	1456.913004	1877.00068
Riaz_Pt31_On	88.28133	0	93679.91477	0	0	54	0	1300.00166	695.00007	0	0	0	0	237.999701	2487.00186	2349.99962	622.00026	3081.00627	1	2377.004	1	10353.97932	1284.97861	650.48394	836.0002	2729.9208	565.99951	2951.99821	16	576.10993	2606.00322	29.99999	1	13.000013	1508.995715	2489.00082	5	614.99972	113.00008	160.999937	161.00001	68	106.80108	1997	2	20.1989	42.00004	186.89646	2092.39419
Riaz_Pt31_Pre	184.9291	0	20392.38404	0	0	92.99993	2	881.9992217	649.0001	29	33	0	0	196	1896.000634	1420.9995	529.00093	2716.005	1	2154.99801	6	7004.9998	2116.7563	605.40892	1162.00075	2811.7385	399.9999	2272.00456	20.999977	463	2535	178.2673262	8	11	1464.000658	1788.9963	0	991.0005	306.00017	111.99984	895.00024	313.9999	86.000072	1384	3	15	23.000003	238.815	2370.8737
Riaz_Pt32_On	6.38483	0	4140.76817	1	2	9.85423	0	63.0000219	74.99995	1	0	0	0	0	765.99984	554.99965	27.99999	879.99996	17.99998	68	0	232	14	40.99995	60.99988	187.00023	49.00005	1395.00409	291.1590723	291.126583	27349.0045	5	0	28	637.9999109	23.000023	0	76.99995	14	2254.00085	1	3	17	87	0	1	18.00002	98.99111	80.999977
Riaz_Pt34_On	117.33561	0	89966.99627	0	0	370	0	901.0001	432.00053	0	0	0	0	35.999994	1517	2393.00561	457.0006	2151.00036	4	1394.00026	8	2875.003341	327.966	569.10723	419.0001309	1395.79048	125	1355.9973	3.77813	779	19665.0024	130.00005	0	12	1053.000706	253.0003937	3	586.00091	516.00041	633.99991	295.9997284	416	331	1130	0	103.00001	338.0007	65.76989	774.7194
Riaz_Pt34_Pre	67.46979	0	141674.1771	0	0	270.99989	2	882.99965	648.00037	0	0	0	0	29.9999886	2031.99729	1952.00513	421.0002	2283.0019	3	1527.99794	3	3814.0034	371	537.00038	461.9998	1736.8939	122	1634.99902	41.000012	499	12877.0369	24.99998	15	4.000001	701.9991262	340.000261	5	314.99996	242.00023	384.00033	296.0003	287.9998	330.5362801	1349	0	251.4639884	208.00033	136.51572	938.3022
Riaz_Pt36_On	287.8352	0	52770.96515	7	2	285.8084003	2	2049.99825	751.00007	4	0	0	0	236.99951	2293.99513	1884.00272	417.00024	5005.9946	8	2379.7615	4	10475.03903	950.89596	1169.85574	507.9994711	1591.516	567.0001	2844.00003	299.928	445.00044	3491.00298	23.99995	0	69.99999	1806.002097	2024.9998	114.99963	512.999643	124.00003	487.0002284	178.00012	186.999922	4051.07006	762.99966	0	2736.92792	28.99997	556.60509	785.5961999
Riaz_Pt36_Pre	28.55678	2.000000129	62298.77511	4	0	838.03179	7	1181.999798	2267.99686	1103.9998	24.99998	0	0	126.9999	1809.00013	2618.00449	459.99998	2476.9994	1	1683.00454	8	4095.00336	429.983	761.39585	504.0001	1370.0039	539.00044	1266.00502	42.89303616	824	14718.99954	451.99955	10	0	1178.999948	554	10.00000307	595.99957	3724.00301	371.99962	6917.0075	3076.00039	248.1137802	1436.99811	27	129.88608	76.00005	399.86838	928.0000941
Riaz_Pt37_On	943.4743	0	23990.8493	2364.9996	0	148.9998	0	539.9994496	833.00032	30	290	0	0	52	3218.0021	522.00003	336.00029	2085.999414	0	1532.0026	17.99997	1470.0026	425	864.00119	503.0002661	2336.8629	175.0001	914.99981	153.99997	189	1692	74	798	30	422.0003138	147.0002	1	1106.000955	63.00002	320.9992702	50.000011	7	61.08879	3247	0	204.9112503	33.00004	184.48893	829.9994
Riaz_Pt37_Pre	357.6709	0	21287.9165	2076.00141	2	245.0001	0	1620.999359	1356.0008	146.9999	856	0	0	110.0004967	2847.997	1531.00392	418.06533	4219.9995	6	2177.9978	19	4020.9991	1622.4295	1596.49764	506.9998	2647.42	457.99979	2618.00323	119.67002	194	2347	116.39765	1577.00383	56	2055.99993	901.0005235	46	2227.995121	233.99963	1350.999347	424	187	156.43539	1559.996	0	187.56465	147	273.474858	940.00067
Riaz_Pt38_On	334.6919	0	57592.73877	0	2	54.00001418	2	3068.99625	2047.00273	0	0	0	0	409.9994	3274.00132	2956.99954	956.00018	7165.99676	5	5171.9968	1	18815.99445	2201.9214	1343.63223	655.999848	4501.8663	1274.00023	5046.99593	161.7662	207.942	8778.00276	134.553607	244	7	1637.99729	1331.9958	0	3626.768615	48.999988	872.99999	7.999999388	119	19.99998	1430.99928	0	9	32.99997	995.3289884	1383.5108
Riaz_Pt38_Pre	260.9136	0	41476.28507	0	1	36	9	2358.99928	1585.99881	4.999996	0	0	0	328.00049	2880.996	2060.9964	712.99781	5487.0086	3	4255.0016	2	14436.04405	1495.9626	1130.19842	592.9999	3650.8594	991.00031	4304.00388	134.97244	182.00044	5978	98.3818	190.99977	3.000002	1140	680.00006	2.000005	2937.00003	47.000037	514.99985	427.00044	113	14	1155.00262	1	57.00003	1512.0005	836.46614	1073.50348
Riaz_Pt39_Pre	196.81467	0	7022.638121	0	0	13	0	1247.99964	289.9995	44.00001	0	0	0	971.9996	1355.00014	903.99962	229.74394	3482.99653	0	2772.474	11	8535.00327	2339.84115	1203.00011	977.99986	3874.9953	766.0003	2507.9962	157.76809	164.999997	1146	145.4213	0	3	353.0002061	45	0	240.0001	54.00002	44.00007652	6063.99576	775.99985	224.99978	1755	0	2	374.0005	1198.66338	1204.916
Riaz_Pt4_On	90.72029	0	295811.6535	0	0	176.7651	6	965.000391	635.99978	0	0	0	0	119	1833.99987	2758.00379	283.234757	2791.00305	2	2586.997	55	5953.99826	966.954	637.7242901	721.9998035	2608.8542	833.9999	1703.00156	479.03219	456.99973	5344.99815	143.6088	5	20.99999	2437.00161	432.9996	31.00004	1252.99922	584.0004	608.0001385	1295.00008	510	780.3742	1907.99872	36.99995	939.6255964	49	244.105406	790.5312005
Riaz_Pt4_Pre	229.89974	0	152910.7779	0	0	54	0	1054.00012	738.00048	5	4	0	0	279.0002	2033.003585	2224.003558	222.00045	4006.9982	1	4613.8567	143	6602.00482	2800.5506	917.1753133	747.00046	3004.9616	486.00026	2284.99954	902.18	112.99981	3814	68.63923	1	34.000014	1834.99974	816.00056	1	1309.99978	50.00003	645.0000669	307	35	85.54647	2006.99793	10	1145.45402	137.99991	634.753594	646.215053
Riaz_Pt44_On	47.00002	0	52123.56953	2	0	1296.997	0	800.99993	885.00041	7	6	0	0	177.0001	1708.996	2123.9959	424.99978	2063.99704	0	1702	9	4057.99823	275	577.00034	442.0003129	1321.0019	352.0001168	1200.00354	19.99996	216	6271.00019	106.00007	0	2	1100.999941	394.0004	107.9999868	304.00002	1095.99996	150.0000163	3039.99694	944.99988	317.21154	1142.00353	2.999999	175.7888	601.9995	163.00739	652.97413
Riaz_Pt44_Pre	67.28392	0	57193.78828	0	3	69.0000077	3	1499.00222	850.99962	48.99995	2	0	5	1067.99986	1672.9999	2376.997038	582.8936005	3469.996478	0	2193.99901	2	6922.99955	714.968	802.99992	891.00023	3999.667	1108.999785	2023.99877	18.00001	1164.99991	4502.00286	36.1371	9	14	776.9991369	144.0000396	15	500.99988	1328.0033	108.00001	3373.99651	814.99989	194.99968	1649.0029	1	37.00002	68.99999	389.98764	1245.99943
Riaz_Pt46_On	201.36307	0	42502.9142	0	0	265	0	1298.9994	366.99972	4	0	0	0	126	1474	2023.0044	783.00028	1777.99994	0	1063.9958	1	2826.00478	215	661.03565	359.0002001	1433.0023	121.00003	1195.99801	27.11257	391	11061.01759	75.9999	2	9	464.99998	118	1.999999357	690.998944	223.99948	330.9992405	130.0003197	162	98.58395	1146	0	107.41636	162.0003	178.29792	663.0004
Riaz_Pt46_Pre	193.47882	0	56196.73717	0	0	381.0004	15	1216.999831	434.0001	15	0	0	0	130.00029	1730.001	2566.99502	603.00029	2650.00037	0	1642.00419	10	3217.00408	397.00014	726.95008	533.99968	1580.9236	177	1360.0036	66.00001	498	13134.04117	31.00001	0	0	865.9998008	217.99975	1	623.99998	353.99955	654.9996018	294.00049	132.99978	174.9999528	1443.00047	1	185.000024	159.99999	291.19665	783.9991
Riaz_Pt47_On	149.2803	0	179373.2181	253.9997	1	140.9997	3	1820.99975	847.00013	73	189.9995	0	0	390	2350.00072	1506.9979	340.9996	3562.008	5	1797.91413	23.00005	5822.9972	1243.95574	768.0613	860.999572	3856.247	866.00047	1969.00148	359.297669	177	4818.99851	148.77	220	3493.00741	4303.00141	820.9998	19.000021	3844.99612	4315.0012	815.9998	2622.0037	1688.00393	259.35819	1048	17	881.64146	2193.0041	412.31595	802.99993
Riaz_Pt47_Pre	159.85843	5.000000422	176930.7584	25.00000003	1	198.4251	8	1435.99988	718.00044	11	2	0	0	380.0003	2347.997876	2005.001003	347.9998931	3577.9987	1	1729.99925	5	5719.00124	1097.97246	808.6367708	883.999942	3742.99672	1033.00021	1919.0042	294.15147	300.00012	5538.00388	164	27.00004	4550.99706	5318.001513	1069.997101	19.99996	4170.0032	6133.0042	871.9997976	3446.99847	2515.96703	279.3752992	1196	24	884.62481	1219.99996	316.99705	852.4487175
Riaz_Pt48_On	61524.9062	21142.96082	136179.8201	2	0	283.9997	7	886.0000723	217.000284	13729.9601	0	0	0	1141.0034	918.0000001	844.99964	567.99994	2676.005	0	1189.9963	0	5150.0049	461.90321	557.9998	482.0004282	1673.7156	2596.00085	828.0004	29	43903.09781	9481.00446	351.581207	0	159.0004545	1909.997405	217.99963	51.999955	2637.00045	8264.0002	236.999899	5057.004075	1855.99758	2963.87776	1246.99618	6138.99909	8334.121788	3	329.03905	863.00006
Riaz_Pt48_Pre	22224.598	16475.74828	113263.2625	1	0	103	2	641.9999426	263.99963	10241.008	0	0	2	1033.9996	850.00003	1147.00069	447.01201	1883.00367	0	1017.0001	1	3998.99846	364.87395	368.93026	441.0004	1576.8575	3142.0028	751.99973	34.763159	32592.45424	8277.00087	603.33031	3	92.99998	1040.000561	121	32.000043	2089.0009	8256.0039	160.99997	4071.9996	1522.99547	2519.23746	1348	5517.0053	2855.769893	888.0001	238.27595	870.0002717
Riaz_Pt49_On	101.26464	0	105873.3655	1	0	302.2974	6	1219.00044	556.9996851	98	1	11	1	105.00005	1930.00248	2394.9994	295.00044	3626.99905	8	2250.0023	0	7578.00155	614.00006	840.00078	606.000034	1857.0046	334.9998	2523.00513	200.50101	539.99991	6598.00261	285.00003	1	10.00001	3212.001024	366.0002433	14	1690.0001	900.00039	829.99952	586.00051	875.00009	913.6890104	1236.9981	17.99997	115.31132	4191.0016	189.38401	853.3626
Riaz_Pt49_Pre	155.9996	0	79286.91268	21.00004	0	534	4	1209.00079	792.99956	637.0003	3	4	0	120	1961.00004	2028.99903	524.00003	3956.9949	0	2273.998	4	5264.99951	694.96275	1013.99993	693.9996042	1731.8881	389.9996	2093.99723	189.9477	336.885	5953.00177	452.9998	7	17.000007	1628.00022	481.0002	38.9999636	3227.00106	1563.9955	469.999718	3268.00121	1810.00466	339.01184	1129	8	161.98824	8819	536.63902	925.16513
Riaz_Pt5_On	168.192	2	119987.8829	4	0	12	0	2011.001934	917.99999	1	2	0	0	121.99992	2391.001474	1280.99919	347.99973	3003.0026	0	2034.004	159.00005	8168.00281	888.94694	990.62181	731.00026	1328.94654	957.00088	3415.996	212.8249	131	3275.00372	63.000034	44	5	1759.99564	1086.99978	16	1550.000052	22	757.9996018	40.000045	38	138.00001	3162.99619	1	331.9998	8261.99844	717.7029	1023.999884
Riaz_Pt5_Pre	181.61927	21.99998072	68909.84873	2	0	21	0	2665.00073	740.9999	0	1	0	0	157	2025.00013	1101.00046	527.99964	2926.9987	0	1434.6965	79.000005	5972.9955	740.99974	1018.0005	555.0001004	1191.9998	630.999353	2831.99664	216.99961	184	2850.00261	46	14	5	1959.004311	767.0000562	15	1216.0003	14	1722.000102	52.000035	27	197.68581	1671	0	130.3142139	5298.9984	913.9598	592.36158
Riaz_Pt52_On	4153.4444	2546.93694	95109.92683	3	3	92	15	1490.00087	1251.99829	1381	0	0	0	496.0007	2709.009441	2557.00535	260.00013	3746.00394	0	2127.0019	371	9421.00055	1092.76902	911.68617	689.00023	5907.903	1725.00037	2052.00482	429.48675	4692.42118	3769	226.13068	14.00001	24	2451.00319	929.9999013	4.000001	1576.86998	3306.0018	221.00013	6010.00538	829.84456	1151.07502	1612.0054	565	1159.92693	6	720.97174	925.6451
Riaz_Pt52_Pre	11277.5925	7498.75323	109831.3197	0	0	53	6	993.0001588	802.99977	5109.9982	0	0	0	842.9999	2028.004798	1720.99811	242.00053	2934.9957	7	1846.999	261.99962	6201.0055	696.86602	626.81206	546.0000809	4407.7831	1534.99956	1544.00069	241.000549	13668.93088	4273.00409	148.96497	6	16.99999	1682.000605	645.0001	23.99996	1707.0008	5028.0003	108.0000328	5605.99989	811	1185.9153	1521	1930	1611.08387	20.00005	546.93027	716.1874
Riaz_Pt58_On	48.55276	0	31943.9411	6	0	25	0	1168.000146	472.00006	0	0	0	0	157.0002	2526.00244	3421.99826	160.083106	4175.0004	6	2643	247.00045	5632.99601	2061.72642	975.997743	816.9992	1875.1984	1223.00151	3761.00264	137.26767	212	10896.96834	120.46055	0	85.99998095	1715.000259	194.9997	2	2547.00144	102.00006	453.00037	980.00029	491	1862.9158	821.0003	14.00000318	4650.089404	11280.9956	710.70867	950.0001
Riaz_Pt59_Pre	170.8	0	76483.98004	7	0	204.686139	17	1735.9985	1256.9981	80	0	0	0	152.99996	3395.00116	1535.0009	267.00038	3753.001864	4	2257.026	10	4820.99591	1060.8533	812.9011863	381.000334	2182.97519	810.0000002	1716.00278	139.00005	202.9996	4095.00081	79.00003	0	323.00035	1267.00063	228.99976	27.000034	939.99975	727.99975	1016.000429	828.00015	611.00012	102.000022	2177.9961	4	66.0000093	42.9999795	613.45322	599.80845
Riaz_Pt62_On	3742.8984	2063.9966	32673.73181	0	0	34	0	1608.99972	790.99989	2059	0	0	0	262.99993	1760.99954	710.99972	278.0006	4071.99643	3	3701.9113	25	5305.0021	2077.79414	926.96092	1053.99975	4663.9154	598.000205	2345.99637	191.54908	3752.99	2444	27.05185	15.00003	0	619.0000435	2629.00314	19	1054.99962	748	43.00000945	358.00004	88	810.8709513	1404.0043	347	1043.129186	6558.9941	928.8032201	324.5330051
Riaz_Pt62_Pre	172.88334	4	14485.82295	3	0	8	0	2392.00372	807.0003	0	0	0	0	60	1814.9998	266.0000402	323.00056	4915.0031	0	3653	4	3364.9985	1908.8643	1216.2637	740.000002	3392.99601	478.0004909	2059.9965	352.10706	53	941	39.99996	8	3	564.9999519	1828.00075	2	454.99999	0	67.99996532	16.000004	8	214.0004	857	0	35.99995	3487.0055	1367.071739	228.5742207
Riaz_Pt65_On	124.2409	0	33059.36902	3	0	83.7886	26	1779.00023	977.99976	32	0	0	0	36.9999632	2582.9962	4094.99676	2869.999	2736.0015	0	1740.8199	57	5732.9966	1013.97615	1117.8083	427.99994	1927.2557	735.0004	3609.0007	534.00923	251.0002	5393.0036	122.943653	0	31	1372.00114	243.00044	21	3393.00444	243.99957	231.9997501	60.99999	207.9997	77.52371	865.00034	0	2458.47638	1035.99962	485.11979	1195.00007
Riaz_Pt65_Pre	142	0	33540.11201	1	0	154.0002	4	1294.00046	1282.00263	66.99998	0	0	0	23.00004	2669.9961	4963.99971	3674.2474	3893.0004	2	2163.2659	69	6658.00202	1394.92936	1205.17613	535.9996748	2343.8234	697.0006	4240.99532	1574.6524	283.828	6169.00086	166.0001	4	12	1176.999063	284.99971	15.99995	3373.995919	254.00045	284.9999	53.9999888	178.9996	125.62487	1022	0	1929.37513	1002.00029	529.54587	1316.4592
Riaz_Pt66_Pre	456.8805	0	5059.79507	0	0	66.000051	27	1857.999863	1128.00041	0	117	0	0	685.00051	1519.00054	793.9996	606.99989	3569.0008	2	3093.9966	296.99989	5126.00113	2460.509	930.0264	1263.00031	3592.877863	2022.999	2318.99733	139.00125	388.00001	5052.99563	223.77522	4	72.000044	815.9996905	64.99999	9	3871.00407	176.99985	329.0001	2028.99934	98.99999	19.00001	2135.99737	0	22	26.00002	937.9862	1453.56115
Riaz_Pt67_On	31.17825	125.99983	8851.8078	0	0	232.52015	301	556.99964	1146.99971	1381	0	0	0	80.99999	1721.00029	1671.00163	565.00071	3387.99542	0	894.00014	9	3597.99701	263	479.99971	349.0005	1004.5153	219.9997	1086.00096	175.000235	931	677	43.9292	0	0	1373.999915	408.9995772	2	991.00053	128.9998	169.000168	1231.99964	15.99997	107.00032	638	0	9	139.00009	59.56433	535.0003
Riaz_Pt67_Pre	28.96997	162.9995065	28698.6549	0	0	224.969	240	737.0008	963.00038	1538	0	0	0	68.99999426	1665.99876	1500.99811	633.99988	3670.993406	0	927.4014	10	3016.00496	571.00006	424.84049	350.00033	1080.8867	190.0001	1148.00003	192.000252	711	1254	60.99995	6	0	1201.00039	537.0001	2	1026.99897	113	137.0000201	894.00059	57.99999	70.8271	541	5	9.17295	977.00076	98.15966	590.8633
Riaz_Pt68_On	189.20652	0	200852.7653	0	0	54	5	1472.99904	685.00032	0	0	0	0	298.00036	2105.0034	1723.00495	347.98934	4408.006084	6	2500.002	5	6112.9984	1208.76619	831.50566	631.99974	1647.5318	311.0004743	4036.0045	41	225	474	26.06777	4	0	3820.00446	2640.00254	1	783.00039	184.0002	329.9996932	6585.0023	572.0002	82.89066	2732.9996	0	6.10937	5386.99893	940.94083	1288.971901
Riaz_Pt72_Pre	123.13515	0	121909.089	5	0	41	33	1254.00081	581.00022	0	0	0	0	290.9997882	1524.0008	2217.0047	274.9997	2483.0028	0	1520.9958	0	7787.005639	923.834	915.042419	848.00077	3597.9847	1370.999	2145.0003	459.639	24	1781.00082	56.508445	4	965	2341.999055	153	3	1776	2483.00096	272.0004207	347.0001169	326.0002	47.00005	2086.00199	0	616.999941	400.00002	765.2257	903.0005
Riaz_Pt76_Pre	601.68554	14.00000278	2966.61865	1	0	169.61495	13	1261.99927	1303.99971	10	28.00004	0	0	780	2376.00048	1830.99863	660.0006	3696.001	1.999998	1237.0003	126	4799.99977	524.00019	1026.99971	516.99975	1279.9523	217	1838.99846	148.712732	137.00001	7806.9962	11.66238	8.999997	5	492.9992926	56.99999	6	662.9999373	34.00004	734.99974	15	0	25.25239	1405	0	70.74762	0	777.81863	854.99924
Riaz_Pt77_On	149.2832	0	31927.15034	2	0	754.7631	2	1510.9993	821.0003	14	0	0	4	102	1830.00024	3825.99541	365.99958	2837.9997	2	1724.9957	23.00004	4353.00456	604.99972	921.46923	791	2086.8432	658.9992	1846.99987	69.99995	928.74575	4274.00393	459.12353	6	17	2542.004861	842.9999823	141.999982	1438.00113	1260.99607	2542.001613	1611.99991	653.00012	877.15506	1657.00154	32	581.84493	79	307.4334742	1258.000011
Riaz_Pt77_Pre	135.9999	0	23660.64837	109	0	365.0001	5	1263.00062	637.99967	13	0	0	0	189	2583.002	2427.9975	335.00022	2869.99978	8.999998	1568.9989	80	6170.99817	660.99014	685.99962	456.000282	1520.0025	579.9999	1895.99632	768.8715	535	1933	90.28086	0	32.99997	2282.999992	2038.00102	68	1220.9994	761.99999	993.0004307	601.00032	203.0005	491.11353	959.9996298	16	277.88643	41.00000002	480.3358	1071.999849
Riaz_Pt78_On	117.64972	0	28306.2685	129	0	251	0	925.00018	2061.999288	662	11	0	0	87.9999974	1496.9997	1217.99649	791.0005	2734.00145	0	2324.999	503	4453.9995	322.99984	1125.99969	471.000064	2805.9973	904.9999	2262.9969	105.0922	938.00032	6615	138.2455	17	5	504.0001872	469.999779	44	983.00017	1264.00064	145.00011	2242.9979	1244	71.9999653	2097.00374	106	109.0000508	434.0004	224.84727	1074
Riaz_Pt78_Pre	100.40672	0	2728.99879	0	0	1	0	1411.000354	667.99978	0	0	0	0	251.0004977	1188.0003	508.00013	431.00026	2657.0026	0	2092.995	40	4615.99963	848.922	1768.12218	358	3006.0044	439.9998	3348.00282	34	51	145	39.99998	6	0	175.0000285	47.99998	37.00007	487.99972	52.99995	51	346.0004	356	18.00005	2476	0	18.00001	2387.00376	292.25687	1612.26703
Riaz_Pt79_On	207.7859	5.000000191	253950.4161	85.00003	0	100.00004	3	1186.00023	770.0001	13	96	0	0	294	1989.9996	3740.00115	476.28014	4433.9959	0	3859.0051	895.9996	4175.99622	1505.9494	1734.08566	1023.99995	2149.8879	1288.00003	3358.99501	159.9998	771.968	1622.0011	82.3666	68	6	2161.00143	1412.0008	2	4088.99693	441.000457	536.9998062	9650.92182	860.83673	837.18425	1432.99709	31	3115.81283	84	821.42701	1333.7464
Riaz_Pt79_Pre	178.047	2.000000019	91980.90112	10	0	43	6	1254.9992	572.9997	0	0	0	0	427.0001948	1631.9999	2011.0014	440.99966	4588.9998	4	4495.999	964.9997	4022.00254	1743.60101	1796.05688	597.0000524	1634.9973	836.0001842	3351.99802	74.000047	294	902	185.4304	9	1	1126.00015	719.99964	4	3772.99645	317.00024	496.00056	13671.00156	605.99955	996.98933	1225	4	3327.00999	45.99996	640.066375	1296.00019
Riaz_Pt8_On	356.0171	0	80852.95044	1	0	73.99996	0	2080.004272	1058.99674	1	0	0	0	622.00022	6328.00384	731.99987	918.5109	3330.9998	0	5333.6626	22.999987	4749.9963	1997.91489	953.00295	686.99949	2996.7422	555.9995	2080.00078	382.3813	87	2059	23.2482	2.999998	121.99996	226.0000304	2073.001	357.000414	820.75131	64.00002	292.99985	585.00026	157.00017	139.79827	814.00045	0	248.2019342	6949.00054	276.99283	1114.6218
Riaz_Pt8_Pre	148.29081	0	70066.96976	8	0	367.41929	5	1628.997	1204.00193	42.99998	6	0	0	630.0001	4457.99957	1491.9953	666.22969	2510.0047	0	3494.00169	8	4947.00411	2356.93677	1044.89035	565.0004167	2777.5156	679.0003	2034.99769	335.717	235	3635	82.16552979	8	127.0001	819.0002541	2429.002049	41.00008	1036.00012	504.9997	454.99984	696.99955	259.00013	167.33272	1029.9981	0	271.6676805	5239.99587	296.2307196	1004.00073
Riaz_Pt82_On	14990.6254	7597.8803	192241.3882	3.000004	0	67	6	1087.00031	356.99984	6714.0023	0	0	0	594.00027	1826.9995	1306.00182	402.25344	3330.992501	4	1891.094	90.00003	5552.99939	1629.79805	1036.66171	623.0003141	2214.6774	1170.99974	2396.99667	1002.2302	10690.1083	4995.00326	90.530313	0	10	1179.999942	201.99959	12.99998	1235.82016	2427.003	271.99991	1624.00008	425.00013	898.81	1384	957.0001	2860.185862	2634.99688	861.82756	489.99983
Riaz_Pt82_Pre	1476.2479	799.5150345	74777.0668	0	0	68	0	1109.00089	554.99968	918	0	0	0	161	1898.0003	1388.00413	460.99994	3184.0013	8	2045.997	260.9999	3200.00411	1835.557	1168.08372	682.0002022	3098.9963	756.0011	2932.99769	1073.3512	1304.00341	3668	94.000084	0	19	499.0005159	161	7	1112.999463	449.9999	228.00029	293.99981	207.00051	319.6586	1698.00341	234.9999	390.34101	4271.00236	695.09794	411.2806016
Riaz_Pt84_On	26.56328	0	17770.81966	0	0	112.701	0	2246.00377	1178.00425	39	0	0	0	233.99996	1135.999932	708.99971	629.99975	3335.002028	1	2814.00528	48.000038	6261.00506	755.98495	1068.846961	1019.99919	3023.6102	1465.99825	1388.9958	204.9999987	208	2749.99884	62.99999	0	19.999986	1086.000224	1013.00032	6	1457.00069	259.99977	109	6689.89349	813.1029	62.168	2240.00119	6	467.83179	22806.0335	478.488266	1499.9998
Riaz_Pt84_Pre	20.1823	0	15885.4177	1	0	82.99999	1	2157.00281	1206.9982	73	10	0	0	257.00038	977.9994	765.99986	531.9999	3141.0016	1	2368.0012	16.000033	5790.00517	860.983	899.99982	1051.00016	2714.9574	1637.9997	1425	227.80087	287	3678	140.231208	1	26.99997	1355.99909	1011	4	1751.9996	272.00041	131.000024	6479.90981	840.09868	42.37558	1762.00221	3	412.6248661	24807.95223	686.21702	1155.93327
Riaz_Pt85_On	457.3222	0	5475.95594	0	0	93.99998	5	1266.00051	703.00057	0	0	0	0	999.9998579	775.99978	1114.00006	821.98808	5192.005074	0	2655.199	1	8151.99922	1030.82249	1034.31525	1189.000808	4711.7191	1488.9998	2528.99572	273.7837	541.99984	4648.00173	115.84941	2	13.000045	2872.998748	1748.002979	1	2736.00069	3878.001	144.00052	5704.9994	1205.00273	28.00005	1507.00435	0	33.99998	6503.9999	339.71257	1146.99977
Riaz_Pt85_Pre	501.5049	2.000000018	4213.97867	0	0	22.000042	2	855.99977	717.00028	0	0	0	0	987.9998	1014.00033	1027.99972	924.02843	5210.9993	0	3103.99601	0	5602.99784	837.98941	1061.36662	1720.00415	6157.2953	770.001	2328.00254	267.8681	512.825	4851.00024	53.21571	13.00001	11	2666.997386	1305.00397	0	2504.99973	5749.0035	40.00001751	6136.0039	789.99985	18.9999844	2292	0	23	6482.99767	154.43095	1082.88366
Riaz_Pt87_On	1292.49792	638.0000407	160659.7555	0	0	62	0	873.000476	407.00032	855	0	0	0	115.9997	2375.99732	2722.00294	421.99993	2774.00089	2	1727.00442	36.00001	4579.99866	571.951	653.22968	583.0003626	2691.82982	579.9997	2206	54.30757	2141	6737	27.49805	0	86.00002	1621.000266	218.9997	4	652.00007	1289.99517	577.000158	3434.9213	345.07536	1641.41157	1812.99725	157	1434.596504	1	167.01594	855.9997
Riaz_Pt89_On	160.99137	3.000000255	79055.26678	1037	0	394.9996	4	1503.000218	1371.00138	55	250	0	0	206.99963	2503.99742	2298.99704	473.99998	4951.999	0	2305.00165	270.99999	3456.0024	1409.9314	950.95299	380.9999004	3543.7453	418.9993998	3474.99959	100.99996	144.9996	3610.00323	56	358.9997	48.00005	1569.000022	370.9998059	2	1172.99996	618.99969	569.0002	427.00027	154	138.99987	1326.99703	0	189.9995367	6	256.87261	898.3087
Riaz_Pt89_Pre	201.87566	0	90645.423	4628.0004	0	571.7776	0	1799.99985	2234.00478	147	1162	2.59326	26	229	2770.9979	2475.99685	589.0006	6397.0021	8	2773.9982	200	4869.99706	1950.72	1199.10126	635.000102	3780.2917	747.00037	3081.00171	177.10472	169.99953	5865.99912	84.999982	1929	184.99995	2118.000344	585.9998424	31.00003	1701.99962	1146.0002	1029.99946	704.000184	229.0005	361.0003871	1428.9974	0	253	63.00005	676.063581	1103.4827
Riaz_Pt9_On	148.7951	1.000000092	17028.61309	1	1	654.0641	15	2248.0035	1373.99631	0	0	0	0	516.0002227	3589.000823	2949.00052	303.00042	3864.0008	3	2620	100.99996	7563.99593	2368.8703	1356.6092	582.000098	3622.734	1799.00082	2157.99621	557.468	2012.961592	4487.00453	44.13933	2	36.00000028	1298.999948	2122.9972	220.99965	1277.999331	137.99992	211.0003728	228.999629	38.00004	183.86462	1703	0	548.13585	1	451.38819	960.48843
Riaz_Pt9_Pre	92.2954	1.000000054	21219.77577	0	10	537.7375	10	1843	1136.00011	0	0	1	0	430.99957	3598.993036	2857.00423	216.99964	3335.00035	1	2280.9997	146	7244.99803	1711.74164	1223.57217	709.99973	3159.7452	1472.9997	1998.00111	360.47107	1708.99901	6277.99737	46.26526	3	68.99997	1040.000327	1931.99524	74	1583.000606	174.00035	105.00004	296.00048	51	238.3671826	1534.99766	7	562.6323	6	365.19279	862.00011
Riaz_Pt90_Pre	395.6732	0	13925.93895	1914.00524	0	167.00027	0	1220.999908	686.00036	0	0	0	0	194.9998	2991.001484	1350.9973	385.9998	3100.00206	3	2952.997	0	4386.0037	1329.97377	635.50742	689.00056	1975.9026	824.99926	2862.99753	1241.00149	130	3497	105.3582	178.00011	35.00004	983.9999088	1056.0039	16	2208.9999	124.9999	425.0002592	476.9998002	325	243.9998582	1114	0	188.00036	14731.0093	676.6257	861.35011
Riaz_Pt92_On	151.64858	0	125394.6047	0	0	202.00009	1	1298.99992	292.00047	0	0	0	0	70	1929.00033	1202.000312	415.8352	2987.99712	3	1807.83	7	4943.99565	718.99393	895.74769	522.99985	2179.9962	528.9998	1765.00101	270.0659	326.99989	2534	174.000094	10	5.000007	1379.00029	538.00024	8.99999	2798.00133	915.99992	563.999494	128	423.9996101	654.9992802	1769.00376	4	35.99996	20	206.37322	441.7395
Riaz_Pt92_Pre	36.44507	0	70759.20961	0	0	149.0000037	2	1809.00082	628.9999	4	0	0	0	149	1369.9998	1255.00068	299.00008	2901.0024	22	2002.004	5	6037.0004	918.9701	1074.19718	573.001	2456.841601	1019.000581	2427.99896	302.729764	172	1727	223.79678	26	7	997.99997	1048.000443	5	2824.99978	529.00046	597.9996927	330.00009	526.00015	200.00001	1238.00128	1	18.99998	44.00002	531.78735	378.2925413
Riaz_Pt93_On	162.0003	0	16539.08442	0	0	589.9997019	0	2908.00271	1296.00142	0	0	0	0	14.00002065	4135.0009	2984.00499	367.99998	4880.9999	6	1989.99894	7	11743.99397	1470.96491	1183.31903	932.00003	3366.9645	723.9999	3006.99576	774.84446	107	3098.00457	28.00004	1	72	1639.99686	4231.001	30.99997982	1524.00044	97	213.00029	50.99998491	35	22719.1297	1085.99994	0	6444.8725	17	841.95232	1304.935582
Riaz_Pt94_On	14571.41838	7370.0011	53903.34181	0	0	225.49487	0	1262.000361	298.99981	6532.9971	0	0	0	787.9999595	1264.000037	1198.00055	321.00055	2862.0017	0	1393.99707	0	6185.00252	1977.3909	570.00033	437.99997	1826.8958	1089.00046	1853.99947	1091.005365	12313.95947	2971	84.28436	4	94	1616.998211	154.0002	24	1383.00052	2896.99639	300.000399	1833.0008	311.9997115	741.35503	893	1303.99733	1048.6453	1596.00388	435.79103	845.00426
Riaz_Pt94_Pre	255.5948	1.000000084	19084.70509	0	0	471.7808	0	1559.995075	473.99984	19	1	0	0	63	1876.99979	1657.99795	259.99689	2904.004723	0	1788.998	13	7772.99974	2317.8547	624.92299	610.99982	2970.8346	398.0003	2401.99976	1624.24208	168	1850.0042	43.0756	5	120	1292.999746	267	44.00003	1051.99968	176.99982	320.999447	304.9999	164.000016	209.00025	1089	2	28.99997	1951.0033	369.846191	733.50745
Riaz_Pt98_On	117.95752	18.00000054	113295.6694	6	0	26	0	1687.00006	589.99963	12	1	0	0	38.00003	1905.99993	1334.99821	461.0001	3458.9932	1	2601.004	18	2564.00195	1281.94539	1044.23559	939.00005	2867.0022	360.9996	1823.99555	313.05869	319.9998	3696	49.2066	0	13	383.9997949	889.99991	8	545.00017	153.99975	329.999806	1722.562412	282.437	278.700693	2232	0	32.2991645	11366.9976	520.2569	393.2685
Riaz_Pt98_Pre	226.85315	3.000002074	65882.37723	16.999959	0	11	12	1733.00099	654.99982	4	0	0	0	26.99999679	1901.001	817.99976	394.0004	4053.000821	0	2430.0694	20.00004	2232.99628	1824.97066	1325.62081	890.99959	2754.0019	417.0003907	1910.00426	353.0259	224	3435.99957	31.00004809	1	2	399.0003769	1451.0008	4	467.00024	96.000043	417.999889	2186.9986	112.000031	47.00001001	2132.99551	0	27.000033	11050.00596	560.0986	346.9999711
Van_Pat02	288.37663	0	47556.06787	1	5.00002	834.002	9.00003	3077.01432	284.000738	0	0	0	0	102.00036	298.00104	2680.01007	106.00029	1672.00617	15	510.00153	0	5009.01936	1138.98738	590.82736	181.0006	96.00021	596.0019	1321.00042	79.0076	292.00115	16226.079	157.00044	6.00002	10.00003	3958.009718	1271.0042	42.0002	131.0003808	802.0027	1356.006969	468.00103	761.00272	357.3266	588.00156	10.00003	314.67549	98.0002	150.47065	434.0011
Van_Pat03	149.53265	7	75430.83922	8827.0044	5	1377.00084	28	4279.00775	2637.00476	171.0001	1348.002	0	1	418.000429	1809.00104	4135.9995	293.99974	4175.0113	9.00001	1314.001	0	8755.0036	2222.2461	1624.31152	1569.0009	735.80439	4285.00047	3353.99729	83.77128	624.00077	32607.033	1055.00027	17078.036	704.00096	6831.0072	2018.99708	157.99958	7338.0033	7648.0012	2147.004237	3556.001123	2170.95409	1014.93669	1234.0053	93.00003	1485.06469	746.00093	494.18324	2754.5475
Van_Pat04	190.36477	1	40248.56343	2	1	86	7	3179.99735	947.0004	0	6	0	0	15.00001335	1110.9998	2203.99739	155.00046	2415.0005	4	727.00017	1	11090.0476	1771.98774	878.94098	623.99923	218.0001	2407.99228	2114.998	105.28491	108.99998	3485.002	112.1665	1	41.00001	5780.997864	5454.0032	6	1779.0005	594.9996007	1710.00443	27.00003	125.00001	9701.3646	673.9996	2	114.640896	15	420.858213	1150.9997
Van_Pat06	222.68514	1	101346.3237	6	10	448	20	4412.9984	785.00027	12.000018	5	0	0	85	1122.00092	4453.00446	109.86811	3964.00657	13.00001	726	0	13603.02063	2187.88715	896.6958	1025.9998	490	3256.0006	2276.00093	120.87488	515.99979	17995.006	1431.99907	52	172.0000999	5989.0037	759.0004	41.00004	2188.0022	7412.9988	4007.99635	1389.999775	3993.84255	658.22	783.9997	48	350.7803503	28.99998	631.710748	1567.74879
Van_Pat08	454.46677	4	115954.7731	3.000001	19	191.0002	17	4487.99625	1108.99993	11.99998	32	0	0	366.0002	1342.00325	2524.00278	180.70505	2482.0001	9.999998	1029	38	12413.9933	4493.0629	1589.96378	1987.99994	1007.99926	4809.99672	4171.99651	248.437582	695.99978	16367.006	607.37406	66	605.99978	5660.0039	356.0003	26.000085	4658.0014	4396.0024	2115.99536	3902.996295	1880.63641	303.53123	924.0001	15	366.46863	32.00005	476.30654	2526.9545
Van_Pat118	136.43434	4	127932.119	82.00005	0	538	26	2805.0039	1126.0018	429	12	0	0	251.0006	2549.00264	4962.99833	271.41533	2563.00053	4	1322.001	0	21752.9657	2644.90681	716.35123	2307.00104	1412.60265	8058.007	3997.00106	65.99999	620.000559	38126.044	3312.00136	25	206.9997395	3556.00532	1014.0008	45	12269.00813	14677.9916	856.0013991	8469.9471	7417.98283	679.9755608	1391.0021	53	576.02499	148.0001	347.8929275	3509.5481
Van_Pat119	83.42204	1	19353.975	2	0	43	5	2148.99557	420.99954	15	7	0	0	195.99984	976.0003215	2794.00568	289.00003	1622.00011	2	930.001	8	4152.99736	622.844	1077.40171	973.99957	892.78793	5180.00316	2972.00507	4.21108	49	8674.0016	1516.0043	17	93	1794.99532	1796.99962	6	18546.0058	1341.99525	289.99955	581.00058	884.99989	180.1512	1943.0019	21	1395.84949	2402.99819	257.04148	2314.93877
Van_Pat123	320.81839	1	24767.53027	1	4	26.99997	9	4185.9995	1249.00036	2	0	0	0	416	1871.00216	3126.9971	397.94794	2784.0008	1	3420.9979	0	40705.0439	2147.84602	1261.52739	2180.99591	2521.11859	6753.99931	6503.0018	79.2023	910.85524	2702.9963	563.0002	37	191.999761	4798.998546	8382.0053	12	543.0002	1136.99984	955.9995	37537.01493	243	145.9997929	1074.9998	0	44.00000103	39409.99168	335.64973	4880.3087
Van_Pat126	210.2894	0	105262.3714	9.999998	1	151	10	3536.00041	785.00028	28.00001	2	0	1	203.99993	1757.0039	2253.99497	401.42213	2083.0006	1	1285	5	16445.0295	821.99825	752.18561	1473.99968	1250.7332	4549.99842	4509.99936	16.77886565	312.99945	7064.003	403	61	504.0003	4556.001575	36429.05671	29	1431.99959	1865.00398	917.00051	1457.002033	884.99944	341.64695	1167	24	3178.34936	6657.006	407.8453	2874.45911
Van_Pat14	182.03799	1	69057.78759	1	1	519.00017	6	3015.99922	656.9995	28.99999	7	0	0	145.99987	1039.9996	3083.9963	267.00031	2698.9997	8.9999974	1246	2	10662.04462	1716.5073	1285.11015	636.00031	746.92936	1180.00016	2998.00451	85.28247	146.00015	8616.9963	480.00026	6	19.00002	4081.00403	6116.0005	630.99932	1044.9997	1083.99954	1174.000208	629.9993	729.78654	208.33341	1378.9959	2	114.6664056	1	1146.44764	1009.774
Van_Pat15	171.7926	1	72947.55242	12	1	44	5	3101.99638	425.00014	3	3	0	1	213.00006	1037.0004	1721.99973	89.00002	2751.001264	1	1159.0009	1	20082.9838	3216.72117	666.33305	749.0000511	358.9551	3147.00063	1235.00027	169.0634	19.99995	1571.9981	83.00007	31.000036	7314.00086	1107.00021	460.99995	9.0000077	1004.99914	69.00009	278.0000709	60.06374	677.911593	55.220644	809.0006	5	817.77927	722.00098	1256.25478	832.99983
Van_Pat16	106.45885	0	7346.20492	5.00001	0	17	1	1310.00241	319.0000081	2.000002	3	0	0	39.000092	719.0015	1398.00235	97.00019	1735.00264	0	500.001	8.000008	2401.99922	974.98902	375.5406	1237.00312	353.9495	6746.01832	1111.99979	84.067625	94.00018	986.0015	412.00071	9.000017	37.00005	1020.00178	452.0008009	0	10798.0126	327.00093	439.00108	165.0003	218.00069	198.68854	599.0012	1	2592.3119	235.0003803	175.64321	2177.0764
Van_Pat19	160.42691	7	52744.71383	0	1	339	10	1862.000977	441.00073	7	3	0	2	112.0001	718.00024	1872.0009	119.00011	1647.0001	4	517.001	6	7884.0001	2210.9333	573.88196	523.00076	315.92933	1060.0006	1183.9998	54.348758	228.99975	10581.0049	266.00012	18.000024	89.00005	2129.998964	932.9997	32.00007	1006.00055	1088.00027	843.0008892	915.00093	482.88928	237.1228	776.0006	34	398.87748	707.00115	326.5595	911.9998
Van_Pat20	132.576	0	93689.23164	1	0	48	4	2516.00074	878.00024	0	0	0	0	353	1665.9971	1375.00015	271	2353.99945	0	580	2.999997	6180.0002	1949.00285	1138.277439	675.9998	476.81826	2028.0041	2084.00479	30	127	3325.0005	185.99997	69	60.99996	595.99994	2684.00185	21.00004	2465.00032	559.99999	353.00012	243.99974	557.87433	245.01405	1379.9969	2	62.98624	1629.9999	776.75993	2997.97672
Van_Pat25	429.8133	7	40975.95085	208.0004207	13	70	1	6502.000697	886.00038	4	16.99996	0	0	109	3620.00253	2914.00527	319.05812	3594.0005	6.000007	2535.0026	19.99998	13659.0125	8795.2036	1922.38607	1817.000006	1041.764	10904.0036	4007.00178	378.16845	677.00006	15869.0172	493.19799	90.00004	1025.0003	1870.997361	5869.9964	99.000009	4064.9935	926.00042	1444.004713	4616.00101	2626.99946	147.0432003	1787.9979	7	327.9564287	1807.0005	1986.76906	3880.14046
Van_Pat27	273.2825	11	68015.98391	8	11	462	12	7749.00103	759.99966	6	9	0	0	314.9996	1835.00159	3734.99702	206.00027	3335.998	4	1169	2	18168.00941	3884.7914	1010.88978	1129.9997	489.88879	5288.00361	1988.99933	134.2809	443.99993	25306.022	160.17746	30.99997	1175.99657	5241.0055	1259.00031	21.99999	2005.9952	762.0005	1241.99986	209.0000006	822.88766	239.1219	1246.00503	0	9654.8754	2507.0037	546.83269	2388.02012
Van_Pat28	141.1024	4	27361.96482	16	3	19	8	4107.99827	560.00014	0	9	0	0	352.0008	1516.99567	1960.99718	315.95479	3542.00166	5	1607.999	7	13837.98563	4056.9951	1431.46172	1431.99966	1178.77368	3246.0051	3728.99869	441.3198	186.999987	11608.9625	336.99974	14.00005	39.000011	3251.000621	504.0006	13.000002	1874.00063	248.99963	1707.00436	301.00003	267.99969	547.38471	1082.00123	52.00001	816.61511	6196.0112	573.77527	2995.00148
Van_Pat29	154.07981	1	70844.30469	19.000026	1	228.9996	14	4488.9984	1366.0015	0	0	0	0	161.99967	1493.99865	4037.9982	206.0001	3168.0005	6.000001	840	16.99997	8543.0001	2193.90153	1639.52097	1048.00046	524.82772	5094.99733	2710.00212	774.3985	712.9996	10148.0019	346.21814	15.00001	52	4968.003219	3640.99745	244.99982	3014.9997	665.00017	2401.002016	1361.99887	430.99988	395.83645	1476.9957	14	759.16419	2840.99717	878.26703	1689.77895
Van_Pat33	178.210666	4	31078.92079	29.00003	0	58	8.00001	4257.9982	1555.00478	7.000002	6	1	2	176.00016	1742.00119	3029.00447	487.00071	3709.005	1.999997	986.00035	1	23104.02441	1501.45204	1004.26884	1452.00072	796.9998	5004.0087	2834.99782	121.466003	303.00064	5168	166.27204	122.00006	73.0001	3631.002948	7029.0027	185.00006	2548.00219	155.00052	737.0006583	583.00051	66.76638	1539.28029	860.00087	5	2150.73187	763.00032	1074.085043	1592.50067
Van_Pat36	211.76212	0	6498.45213	18.999951	1	52	7	4600.9993	528	2	13	0	1	484.9999	1144.9975	2157.0011	305.99991	3114.9976	0	867.99938	1	27903.9605	2176.74579	2318.46928	1290.9992	697.87666	5900.00311	3470.00265	90.00697	229.99973	9214.0008	864.00066	61	684.9996	903.99999	190.9995	23.99998	1382.00026	7246.9963	209.00038	12851.00473	2456.24492	41.3645	1187.9991	2	61.63551	1730.0004	632.91321	3016.21313
Van_Pat37	155.49213	0	69012.09315	2.999996	4	121	17	2973.00113	1355.0029	0	42	0	3	587.0004	2230.9991	3743.9994	226.00022	2345.99992	1.999996	585	0	19146.9922	1843.9992	708.60334	729.0001705	1086.9211	190.99958	2581.00251	299.95982	77	19110.017	107.9999185	34.99996	3745.99995	4994.001393	4083.99946	52	85	565.99982	1191.00006	232.99947	248.00002	116.836748	1511	8	56.16339	16.99995	1540.88007	2553.83791
Van_Pat38	201.2665	2	67596.1154	3	1	227.9997	7	5116.00646	1283.00334	1	3	0	0	330.99997	5784.99909	3844.00722	249.0009	3820.9932	8.00001	1402.0009	1	25389.0108	1957.80812	1238.59864	1412.00175	606.00047	2589.99697	3481.00266	440.587359	446.00058	25997.061	88.00001	78	6275.00805	6327.00674	1397.0035	30	2130.00097	594.0005	2033.003714	3060.99837	490.00022	597.74511	1571.99798	3	4072.2596	69.00009	1140.60009	1806.00218
Van_Pat39	158.1529	0	80641.546	0	1	946.001	85.0001	3973.0062	1044.00121	143.9996	136	0	0	136	787.00025	4904.99721	103.00016	1671.0014	6	610.001	0	7694.0104	998.00116	701.84364	1245.0008	454	3825.00319	1514.0009	74	319.9999	31551.033	2853.0023	31	320.0007	3644.99969	1214.001	13	4587.00396	17043.99812	1273.00106	7230.0005	9251.00321	636.8806	1137.0013	94.0001	1036.121	467.00107	564.00041	1435.0006
Van_Pat40	262.9996708	0	126251.305	38	0	248	39	3527.001	782.00014	5	7	0	0	149.0001	1382.99819	3434.9978	67.5577	2500.0002	2	810.99984	11.00001	10184.9611	2627.51843	1077.74369	1598.99975	675.99997	13433.9989	2736.00165	549.5576	140.00006	19304.03	167.00012	9.000006	2789.0009	1158.000231	497.0006	146.000084	3566.00039	1713.9985	1144.000285	4820.00288	1534.00483	235.6721	982.00043	10	1568.32994	11608.009	426.85906	1958.0808
Van_Pat41	7	0	508.99978	0	0	0	0	20.99997	3	0	0	0	0	0.99999971	5	10	0	16.000037	0	4	1	63.00002	22	17.7024869	5.999996058	6	12.00000069	6.999993	1	0.99999961	47	0	1	0	5	26.00005	0	7.000003	2.000002	8.000001692	18.000037	0	1	9.999998	0	9.000002	24.00004	9.57801	4.000003
Van_Pat43	55.83058	0	45201.52283	2	0	440	41.0001	1564.00214	417.00066	0	0	1	11	316	809.0011	2898.0037	130.00006	1024.00194	0	441	0	6015.0111	638.00048	472.00101	729.0009	387.000442	2310.00028	1124.00307	27.9393	294.99947	17123.9906	759.00118	0	37.00009	2164.000731	285.0006	42.00003	928.99999	5183.0033	644.0003526	1589.00169	2959.65075	670.0007	594.0008	3	354.00021	84.00017	171.34358	1223.00105
Van_Pat44	384.45287	1	13902.0201	1	0	96	9	3318.99493	765.99982	3	2	0	0	313.0002	704.99977	1960	246.99992	3202.0006	4	1054	0	34606.0377	3460.3005	1057.72513	1154.999926	1352.50872	5358.0002	3363.99767	28	434.00015	626.9995	268.99971	115	111.99998	11349.99424	12378.9995	9.999998	5187.00246	729.00025	285.9997	25835.99275	286.99972	20.783852	1751.00345	7.000002905	50.21612	174.99999	1096.41254	2947.6269
Van_Pat45	250.06128	0	11931.65174	5	0	25	18	1969.99899	562.0002	0	19.99999	0	0	609.0001	552.00044	1308.00041	142.9997	2343.0003	2.000003	867	5.000003	10315.9565	3512.9016	1215.5088	952.00001	462.00071	5376.99933	2041.99649	192.383589	725.99955	3058.0052	317.553	42.00004	1470.9954	1235.00098	2228.0041	23	2095.00005	805.00011	1184.000851	2246.000372	377.0008	101.45506	644.99967	0	253.54496	10349.99823	638.35865	1499.00049
Van_Pat46	153.07434	2	100352.8739	0	1	127	18	2718.9975	480	3	2	0	0	1032.9997	619.9997	3123.9968	865.3082962	1835.9998	3	802	24.00003	8090.0038	1964.99461	1062.92888	696.99999	307.88472	5354.99961	1843.0038	66.59577	552.99991	16774.016	383.99967	37.99996	165.99974	3224.0027	1044.9998	212.99994	405.9997	5490.0037	339.99961	11817.99959	2334.43497	92.28725	890.9998	1	457.71313	15	551.73794	1665.20872
Van_Pat47	195.79284	0	154303.3852	5	1	28	3	2491.998056	383.000249	0	0	0	2	154	690.00017	1680.99543	158.00038	1801.00074	2	588	0	12750.95294	2025.9804	514.05274	684.00023	362.00028	2471.99878	2031.00489	160.1621355	142.99957	4651.0043	80.0001	22.00004	170.99953	2654.998804	1139.0006	53.999965	1366.0012	214.99956	1023.999577	10.999999	101.000046	33.1447344	827.00016	0	1106.855521	1565.0003	337.412413	889.62752
Van_Pat49	263.05753	1	68373.39051	70	0	2951.00148	36	5563.998	1497.0036	4	30.99999	0	1	275.9995	1708.00187	5946.0041	396.00018	3640.0035	13.000005	1257.00017	9	16469.9903	3885.789	1584.74029	1933.99986	627.893	5995.00337	3810.00272	104.66991	1167.00079	30742.04	2061.5521	124.9998	779	13484.01519	2321.9974	26.999998	6218.00119	12470.02	4937.00452	5671.99872	9118.536	2255.8934	1415.00469	86	1307.10701	65.00011	802.27531	3228.17574
Van_Pat50	441.00156	2.000006	23354.2538	15	4	62	10	3529.00656	1348.00489	3	2	0	0	221.0002	1965.0051	2081.00144	255	1984.0011	5	589.00067	2	10996.0405	1613.63927	1165.95795	1044.00068	458.77665	3452.00719	1853.9989	709.53793	111.00004	7016.0006	129.00012	94.0001	203.00034	701.0008102	4942.0016	12.00001	3107.0036	342.00029	1530.002273	509.0007565	421.925	115.00006	1746.0005	0	188.00022	3382.0002	620.78411	2005.08318
Van_Pat79	414.3294503	1	23953.37461	4	0	55	7	2845.00435	960.0001	0	5	0	0	209.00028	949.9997	2287.9996	406.99981	2612.9998	0	1088	0	9044.9998	1818.82134	1080.247727	744.00041	257.99955	2774.00364	2333.99942	988.135	81	9360.998	172.00003	12	50.999954	3494.996783	2982.00437	14	2578.99864	230.99998	2831.99916	56.9999958	172.0005	108.85454	1180.00339	3.000004	87.14547	4369.0078	411.7137	1388.95445
Van_Pat80	449.63509	0	77273.38215	1	1	190	14	3382.999966	925.0012	14.00001	7.00001	0	1	279.00019	1117.00051	3419.00598	115.00002	4371.9967	9	1064.00008	3.000002	24673.03094	3892.49576	1165.75604	1028.001274	635.91859	3374.00756	2774.00628	70.9802	221.00047	20911.014	141.00006	369	23.99999	3804.00474	264.00038	18.00001	2398.00362	731.00056	1246.000624	113.00006	448.00055	625.8773	1161.99848	1	5443.127935	1667.00051	775.1341	1625.45415
Van_Pat81	196.17342	0	91036.48698	1	1	110	7	3886.99537	689.99963	0	0	0	1	189.99985	563.0001	2522.99582	289.07822	3330.999116	3	875.00026	0	15726.03141	1598.9741	1210.52899	660.9994811	878.86209	1988.00058	2179.00167	95.957	239.99991	7623.9986	228.99988	32.99998	9.000006	3278.999652	2304.99609	3	3573.99873	314.99997	831.0004469	218.9998577	154.99997	119.23971	709.00001	0	1217.760146	783.00004	902.60052	1651.343
Van_Pat83	107.2249073	2	378768.1182	5.999997	0	206.0002	11	4119.998955	1014.00033	0	2.000001	0	0	245.00012	1224.99621	3939.00351	272.99992	3029.00077	3	1108	1	16354.95492	1894.99612	1626.95197	1838.00013	599.8906	3115.99984	2899.004	149.781	451.00006	21952.975	346.2037	9	25	5215.00229	822.9999	10.00001	2159.9992	839.99985	1594.00542	7279.999612	743.79912	639.74214	2798.0022	14	1138.25808	8819.0013	1088.883	1959.3963
Van_Pat85	324.73928	2	50123.26187	2	1	349.0004	31	3241.99947	794.00026	13.00002	4	0	2	250.0000446	1338.0036	5756.00141	122.99999	3712.9969	20.000042	709.001	11	11630.02912	1964.46737	914.93934	867.9996	312.999571	2094.00045	3553.00543	757.44499	717.00064	31539.012	186.21848	15	91.99999	10092.99533	1192.0003	16.00001	1247.9997	1433.9966	4294.00132	753.99982	892.00004	1871.41995	920.0006	6	1456.57605	61.99998363	627.3615	1762.90923
Van_Pat86	156.7619	0	580850.5982	4	4	68	4	1709.997473	388.00006	1	4	0	0	571.0001	1804.0001	2653.00212	298.47696	3342.9999	2	836.00026	27.00003	12852.98583	2463.93759	1228.33209	1219.999055	1107.73835	7970.00093	2808.99759	194.8028	384.00049	7638.0033	215	48.000053	2626.0004	1990.0014	1386.0012	147.0005	2829.0035	2656.9981	292.0003919	8551.871248	1431.12575	382.3661	1481.9961	13	1888.634232	80.99998	449.99873	1772.31524
Van_Pat88	237.21989	0	82481.49588	12.00001	0	40.9999968	8.00001	4976.0023	642.00115	0	8.00001	0	1	549.0002	2707.0026	4977.0042	267.00053	3768.0036	22.00001	1559.00252	2	26604.0461	3902.9023	1123.48255	8445.0099	1045.00139	6767.00575	4166.00599	248.46936	357.00031	12404.0046	442.00034	56.00005	265.00009	6321.005016	2482.0005	257.00006	4137.99962	309.00036	2055.998806	41.000005	2091.00424	1305.23034	2241.0074	12	812.773781	14897.02356	617.90624	2972.3799
Van_Pat90	304.87993	0	54448.36587	21.00001	3	89.0001	17	3725.99622	744.9999	0	0	0	0	280.9998	1545.00581	1753.00094	273.00028	2541.9991	11.00001	1472.00521	13.99997	8799.0045	4018.6102	1024.139615	1168.99988	1410.84061	4443.99983	2401.00559	307.80064	268.0002	25912.993	420.9997	130.000346	138.0003	6008.998252	5420.00099	7.00001	2310.00224	635.00055	910.00022	312.99973	409.0002	244.99985	1535.0001	2	545.00008	2839.0055	685.20729	2740.49925
Van_Pat91	105.1464	14.00001	97943.19679	3	0	299.0004	8	2821.99668	414.00019	26.00005	3	0	0	428.0001	628.9998	1698.0002	158.999914	2075.0004	1	552	0	24023.0348	1493.88594	495.5388822	625.00009	198.88882	1676.99966	2926.00418	1371.52115	146.92183	12850.025	371.99984	36	1697.99663	3665.999781	917.9998	34.99996	926.0013	1352.99915	667.999943	1210.99923	883.00033	254.2283	516.9998	49	2436.77388	2955.9955	1315.36876	1466.229
Van_Pat98	346.81009	0	128059.5009	2.999999	0	95.99998	8	3923.99926	334.00025	1	2	0	0	84.00002	1578.9952	2868.99754	102.0000496	3689.00398	7	868	2.000003	21721.00341	3842.8013	898.327539	1490.9995	524.99978	1961.00368	2382.99931	506.56248	278.99952	13582.028	562.00038	8	56.00004	7224.99946	8817.0031	16.000033	4819.9983	618.000309	1696.99907	235.99947	507.99994	146.00032	780.9998	11	261.00024	23027.99831	739.74059	1812.0004
[truncated: 5,000 more columns]
