# Supplementary material for: Construction and Validation of a Tumor Microenvironment-Based Scoring System to Evaluate Prognosis and Response to Immune Checkpoint Inhibitor Therapy in Lung Adenocarcinoma Patients
Source: Genes (Basel). 2022 May 26;13(6):951. doi: 10.3390/genes13060951 (PMC9222903; doi:10.3390/genes13060951)
Supplement: Supplementary file 1 [file genes-13-00951-s001.zip › Supplementary table S3.CSV]

Sample_ID	Patient_ID	Subtype_Immune_Model_Based	Study	Subtype_Curated_Malta_Noushmehr_et_al	CHANG_CORE_SERUM_RESPONSE_UP	CSF1_response	LIexpression_score	Module3_IFN_score	TGFB_score_21050467	Th1.cells	Th2.cells	Th17.cells	OS	OS_time	PFI_1	PFI_time_1	B.cells.memory	B.cells.naive	Dendritic.cells.activated	Dendritic.cells.resting	Eosinophils	Macrophages.M0	Macrophages.M1	Macrophages.M2	Mast.cells.activated	Mast.cells.resting	Monocytes	Neutrophils	NK.cells.activated	NK.cells.resting	Plasma.cells	T.cells.CD4.memory.activated	T.cells.CD4.memory.resting	T.cells.CD4.naive	T.cells.CD8	T.cells.follicular.helper	T.cells.gamma.delta	T.cells.regulatory..Tregs.	Lymphocytes.Aggregate1	Neutrophils.Aggregate1	Eosinophils.Aggregate1	Mast_cells.Aggregate1	Dendritic_cells.Aggregate1	Macrophage.Aggregate1	Neutrophils.Aggregate2	Eosinophils.Aggregate2	Mast_cells.Aggregate2	Dendritic_cells.Aggregate2	Macrophage.Aggregate2
Gide_ipiPD1_Patient1_EDT	Gide_ipiPD1_1	C2	SKCM	NA	3722.99934	3031.99808	837.153495	3957.00053	8008.992	7.550728391	8.996938673	4.763184201	0	1.886379192	1	15	0.122892611	0.001768723	0.003120633	0	0.010814456	0.220379296	0.015172959	0.306017664	0.010272245	0.037699835	0.018184288	0	0	0.026583387	0.042840794	0.070205909	0.009626773	0.054275831	0	0.02630729	0.023837306	0	0.378338625	0	0.010814456	0.04797208	0.003120633	0.559754206	0	0.010814456	0.04797208	0.003120633	0.541569918
Gide_ipiPD1_Patient1_PRE	Gide_ipiPD1_1	C4	SKCM	NA	3129.99798	1270.00008	96	2210.50075	5479.0018	7.048945722	8.359092636	1.133868721	0	1.886379192	1	15	0.056729245	0	0.011958294	0.012044038	0.00275202	0.14069247	0.023061002	0.280244159	0.031868365	0.04644455	0.062932547	0.016899537	0.000651	0.019576216	0.04584926	0.028674461	0.142603583	0.070438669	0	0.006580199	0	0	0.371103017	0.016899537	0.00275202	0.078312915	0.024002332	0.506930178	0.016899537	0.00275202	0.078312915	0.024002332	0.443997631
Gide_ipiPD1_Patient10_PRE	Gide_ipiPD1_10	C1	SKCM	NA	587.0001	261.00007	74.5	237.5001338	1080.00052	5.658994906	7.588187485	0.894089611	1	0.481861739	1	81	0.082959533	0	0.006276675	0.002813484	0	0.148807046	0.038089018	0.221060831	0.102491128	0.022582587	0.04721387	0.017333916	0.022781184	0	0.111878662	0.035254713	0.020806254	0.054644528	0.028390444	0.035367755	0.001248374	0	0.393331446	0.017333916	0	0.125073715	0.009090158	0.455170764	0.017333916	0	0.125073715	0.009090158	0.407956895
Gide_ipiPD1_Patient12_PRE	Gide_ipiPD1_12	C3	SKCM	NA	1512.00081	5285.0008	2826.0044	2593.0005	4280.0001	8.40420591	8.085417663	6.46541431	0	0.802190281	1	82	0.083725425	0	0.003637708	0	0.003114113	0.19196337	0.011854996	0.38030417	0.066153383	0	0.006104405	0.002214536	0	0.026013117	0.037401379	0.050469312	0.036834817	0.087071082	0	0.013138186	0	0	0.334653319	0.002214536	0.003114113	0.066153383	0.003637708	0.590226942	0.002214536	0.003114113	0.066153383	0.003637708	0.584122537
Gide_ipiPD1_Patient13_EDT	Gide_ipiPD1_13	C3	SKCM	NA	470.9999	4025.99913	2353.511214	1027.50006	860.5019011	7.985078336	8.827202942	2.374422079	1	0.977412731	0	108	0.089856198	0	0.018748605	0.029766368	0.019297322	0.123706354	0.007247813	0.239076718	0.171199162	0	0.024694364	0.030952407	0.00522607	0.01176295	0.044350892	0.037595624	0.068060729	0.051874813	0.004719964	0.021863648	0	0	0.335310887	0.030952407	0.019297322	0.171199162	0.048514973	0.394725249	0.030952407	0.019297322	0.171199162	0.048514973	0.370030885
Gide_ipiPD1_Patient13_PRE	Gide_ipiPD1_13	C2	SKCM	NA	714.0001	3078.99922	1533.42002	1787.49975	959.9998	7.70110787	8.508471938	1.703692621	1	0.977412731	0	108	0.091715033	0	0.003383553	0	0.002092321	0.089959422	0.004023047	0.280454139	0.061056653	0	0.064400797	0.134537703	0	0.007397478	0.117990161	0.016759287	0.011182257	0.080897721	0.00860059	0.00858224	0.016967598	0	0.360092365	0.134537703	0.002092321	0.061056653	0.003383553	0.438837404	0.134537703	0.002092321	0.061056653	0.003383553	0.374436608
Gide_ipiPD1_Patient14_PRE	Gide_ipiPD1_14	C4	SKCM	NA	888	410.99958	87.500025	447.500015	1430.99958	6.728405775	8.21522448	2.573009032	0	1.891854894	0	123	0.109658867	0	0.031887574	0	0	0.179435949	0.004655671	0.293558252	0.074784745	0.006899495	0.035044873	0	0	0.018234312	0.075168021	0.015226344	0.075007388	0.047568529	0.012182984	0.01791936	0.002767638	0	0.373733442	0	0	0.08168424	0.031887574	0.512694744	0	0	0.08168424	0.031887574	0.477649871
Gide_ipiPD1_Patient15_PRE	Gide_ipiPD1_15	C4	SKCM	NA	954	468.0001	121.499885	860.50013	1223.9999	5.720979792	8.327619103	2.016042727	1	1.80698152	0	152	0.057506271	0	0	0.022254332	0	0.016399909	0.068502994	0.187753845	0.068734823	0	0.046980729	0.003365383	0.065141252	0	0.021530513	0.093419653	0	0.113363717	0.168944742	0.053492518	0.012304932	0.000304	0.586007986	0.003365383	0	0.068734823	0.022254332	0.319637475	0.003365383	0	0.068734823	0.022254332	0.272656747
Gide_ipiPD1_Patient17_PRE	Gide_ipiPD1_17	C4	SKCM	NA	1444	1398.9986	246.999985	1895.50014	4291.00287	7.06715521	7.972476333	3.492673843	0	0.536618754	0	196	0.098869314	0	0.00341061	0.017831907	0.005263495	0.053112673	0.041634404	0.197814477	0.048178697	0.017363267	0.0695363	0	0.041416488	0	0.046674231	0.042274881	0.054632086	0.133904106	0.083800904	0.028389787	0.015892373	0	0.545854169	0	0.005263495	0.065541964	0.021242517	0.362097855	0	0.005263495	0.065541964	0.021242517	0.292561554
Gide_ipiPD1_Patient19_EDT	Gide_ipiPD1_19	C2	SKCM	NA	617.1990004	1642.21979	1000.001055	809.50011	997.99961	8.025349538	8.492145778	2.65008566	0	1.73853525	0	301	0.11552981	0.06164164	0.001508794	0	0.002063729	0.13583928	0.021265248	0.16364541	0.019892314	0.018325615	0.007770584	0	0	0.026115419	0.202630374	0.032017746	0.033663148	0.084727411	0	0.052134555	0.021228924	0	0.629689025	0	0.002063729	0.038217929	0.001508794	0.328520522	0	0.002063729	0.038217929	0.001508794	0.320749938
Gide_ipiPD1_Patient19_PRE	Gide_ipiPD1_19	C3	SKCM	NA	612	898	676.4996	373.5001895	1281.96557	6.839196691	8.287526132	2.789137379	0	1.73853525	0	301	0.093071246	0	0.022493083	0.00613676	0.005470395	0.028340292	0.037028664	0.242768648	0.06061584	0	0.036216696	0	0.017622515	0.01100669	0.10876795	0.155130059	0	0.108127064	0.020119537	0.033050795	0.014033766	0	0.560929623	0	0.005470395	0.06061584	0.028629842	0.3443543	0	0.005470395	0.06061584	0.028629842	0.308137603
Gide_ipiPD1_Patient2_PRE	Gide_ipiPD1_2	C4	SKCM	NA	857	1034.9999	208.999635	1223.00167	2736.0034	7.729047855	8.678634159	1.923137167	0	1.451060917	1	34	0.109184294	0	0.004328358	0.023423315	0.009515937	0.103254677	0.036280067	0.246147414	0.049521595	0	0.098603382	0	0.019553376	0	0.065929963	0.090450046	0.069240696	0.030110851	0	0.022671355	0.021784674	0	0.428925254	0	0.009515937	0.049521595	0.027751673	0.484285541	0	0.009515937	0.049521595	0.027751673	0.385682158
Gide_ipiPD1_Patient20_PRE	Gide_ipiPD1_20	C2	SKCM	NA	1591.99687	6524.9991	8053.003452	3156.50065	1497	7.558765033	8.674057498	4.934298931	0	1.472963723	0	386	0.056588389	0.017506512	0.035204844	0.002066713	0.003528253	0.050559698	0.016003482	0.342592497	0.066026459	0	0.026846351	0.018340099	0.039211169	0.001095481	0.037058412	0.033066722	0.229473017	0.017302392	0	0.00752951	0	0	0.438831605	0.018340099	0.003528253	0.066026459	0.037271558	0.436002027	0.018340099	0.003528253	0.066026459	0.037271558	0.409155676
Gide_ipiPD1_Patient21_PRE	Gide_ipiPD1_21	C2	SKCM	NA	3668.9977	8682.998522	5475.99795	3586.492795	8042.00463	8.205967822	9.094077318	1.867075897	0	1.122518823	0	410	0.136505808	0.139548028	0.005691802	0	0	0.06464748	0.047908172	0.11917514	0.035951511	0	0.01135324	0	0.012997198	0	0.193856254	0.041855393	0.040676007	0.109297983	0	0.026445308	0.014090678	0	0.715272656	0	0	0.035951511	0.005691802	0.243084031	0	0	0.035951511	0.005691802	0.231730792
Gide_ipiPD1_Patient23_PRE	Gide_ipiPD1_23	C4	SKCM	NA	1713.00266	1141.9998	164.50005	962.9999	2305.9996	6.238270645	7.969512929	3.123017576	0	1.385352498	0	506	0.199675773	0.000122	0.041737762	0.015125443	0	0.057421309	0.088239442	0.084880922	0.006853946	0.032158052	0.028228337	0.015969919	0.017569815	0	0.042287661	0.069081925	0.047733714	0.192254669	0	0.030662904	0.029996088	0	0.62938487	0.015969919	0	0.039011997	0.056863204	0.258770009	0.015969919	0	0.039011997	0.056863204	0.230541673
Gide_ipiPD1_Patient24_PRE	Gide_ipiPD1_24	C3	SKCM	NA	662.00028	1110.00108	391.000195	654.5	1631.9994	7.697345964	8.75562769	7.128980243	0	3.293634497	0	509	0.179609831	0	0.009917691	0.004878633	0.018043582	0.062182672	0.02198451	0.196216936	0.023086072	0	0.035018615	0.00379913	0.003433472	0	0.067441239	0.093665224	0.048205068	0.162237537	0.027213132	0.027362589	0.015704066	0	0.624872158	0.00379913	0.018043582	0.023086072	0.014796324	0.315402733	0.00379913	0.018043582	0.023086072	0.014796324	0.280384118
Gide_ipiPD1_Patient25_PRE	Gide_ipiPD1_25	C4	SKCM	NA	2284.003	1342.001	319.99971	1254.00085	8084.0024	6.492578829	8.248292213	1.778594479	1	1.418206708	0	518	0	0.107966923	0	0	0	0.07085402	0.128118067	0.215120019	0.085877083	0	0.031919941	0	0.042818644	0	0.084082273	0	0	0.036206042	0.053055358	0.092455876	0.044961137	0.006564619	0.468110871	0	0	0.085877083	0	0.446012046	0	0	0.085877083	0	0.414092105
Gide_ipiPD1_Patient26_PRE	Gide_ipiPD1_26	C2	SKCM	NA	2160.79721	3086.9961	2760.05447	1196.999915	3939.00435	7.736617283	8.883446028	4.417675394	0	1.489390828	0	544	0.103006448	0.000452	0.004116068	0.031051466	0	0.05090435	0.014641809	0.327012044	0.015244233	0.090150213	0.043746358	0	0	0.023179842	0.06616856	0.040782302	0.040182152	0.063344664	0	0.074272543	0.011744646	0	0.423133459	0	0	0.105394446	0.035167534	0.436304561	0	0	0.105394446	0.035167534	0.392558203
Gide_ipiPD1_Patient27_EDT	Gide_ipiPD1_27	C2	SKCM	NA	967.00002	2220.998	1254.442815	1349.200331	1911.000378	7.796712516	9.040690442	3.057168385	0	1.49486653	0	546	0.251291027	0	0	0	0.000462	0.116265188	0.045323598	0.214977337	0.041749576	0	0.011356667	0.000511	0.024587446	0	0.062767208	0.01073119	0.052970489	0.142710954	0.02076191	0.003534973	0	0	0.569355199	0.000511	0.000462	0.041749576	0	0.387922789	0.000511	0.000462	0.041749576	0	0.376566122
Gide_ipiPD1_Patient27_PRE	Gide_ipiPD1_27	C2	SKCM	NA	786.03066	1842.9952	1248.473605	930.07863	1544.00004	7.655805274	8.853292117	3.07590627	0	1.49486653	0	546	0.087842884	0	0	0.021837611	0	0.004658688	0.069983185	0.20736054	0.035894031	0.044473303	0.040338643	0	0.044845103	0.018559807	0.054514653	0.166014669	0	0.048357546	0.108921607	0.046397729	0	0	0.575453999	0	0	0.080367334	0.021837611	0.322341056	0	0	0.080367334	0.021837611	0.282002413
Gide_ipiPD1_Patient32_PRE	Gide_ipiPD1_32	C4	SKCM	NA	1647.0005	3867.883859	1838.5005	2021.000205	1823.998	7.992685357	9.08846426	0.829756784	0	1.63449692	0	597	0.230037459	0.001455809	0.005286267	0	0	0.021535939	0.023147003	0.165100966	0.044154187	0.021672538	0.030499454	0	0	0.02255061	0.143072724	0.033056825	0.076642545	0.166518368	0	0	0.015269307	0	0.688603647	0	0	0.065826724	0.005286267	0.240283362	0	0	0.065826724	0.005286267	0.209783908
Gide_ipiPD1_Patient33_EDT	Gide_ipiPD1_33	C2	SKCM	NA	633	3692.999	1476.35279	1831.99966	1933	9.096042379	9.155117936	4.95226632	0	1.667351129	0	609	0.150149718	0.169897474	0.015368819	0	0	0.080296112	0.024718991	0.097559881	0.037697981	0	0.037453289	0	0.004809292	0.002663963	0.078222863	0.077242549	0	0.151787248	0.031475813	0.02018542	0.020470586	0	0.706904928	0	0	0.037697981	0.015368819	0.240028273	0	0	0.037697981	0.015368819	0.202574984
Gide_ipiPD1_Patient33_PRE	Gide_ipiPD1_33	C4	SKCM	NA	670.32809	804.00042	116.4997665	346.00025	1096.00059	6.997699168	9.033431696	2.514412152	0	1.667351129	0	609	0.101099422	0	0.024256976	0.002788706	0.001074009	0.059795133	0.014106074	0.196470505	0.018547708	0	0	0	0.057938336	0	0.149217458	0.046930165	0	0.104614617	0.100864123	0.089277109	0.033019658	0	0.682960889	0	0.001074009	0.018547708	0.027045682	0.270371712	0	0.001074009	0.018547708	0.027045682	0.270371712
Gide_ipiPD1_Patient34_PRE	Gide_ipiPD1_34	C3	SKCM	NA	1097.9999	1768.02357	556.49981	1258.999925	4668.993	7.782872615	8.098179925	4.384489168	0	1.70568104	0	623	0.133965335	0.001571194	0.01514843	0.023377397	0	0.072618863	0.050930561	0.195805502	0.046181181	0.016766422	0.028386035	0.008795611	0.029940189	0	0.080256116	0.036633962	0	0.083462341	0.057044064	0.093578901	0.025537898	0	0.54199	0.008795611	0	0.062947602	0.038525826	0.34774096	0.008795611	0	0.062947602	0.038525826	0.319354926
Gide_ipiPD1_Patient35_EDT	Gide_ipiPD1_35	C2	SKCM	NA	750.99948	796.9998	547.000595	532.343885	1765.99968	7.660200738	8.54826589	1.647871117	0	1.716632444	0	627	0	0.100908898	0.012994993	0.013196175	0	0.089977278	0.042160918	0.197896536	0.020108943	0.022964679	0.066535467	0	0.015845342	0	0.113471255	0.097846646	0.005444327	0.045625506	0.098623329	0.032542609	0.019197546	0.004659552	0.53416501	0	0	0.043073622	0.026191169	0.396570199	0	0	0.043073622	0.026191169	0.330034732
Gide_ipiPD1_Patient35_PRE	Gide_ipiPD1_35	C2	SKCM	NA	522.00039	486.9998	355.389952	537.500205	896.99965	6.983644711	8.255713491	4.009502242	0	1.716632444	0	627	0.038555755	0	0.013328925	0.01452931	0	0.089683412	0.034024418	0.368502332	0	0.103480258	0.029085227	0	0.018864978	0	0.066221021	0.038650262	0.052501834	0.084422812	0.00486955	0.015325797	0.027954108	0	0.347366117	0	0	0.103480258	0.027858235	0.521295389	0	0	0.103480258	0.027858235	0.492210163
Gide_ipiPD1_Patient36_EDT	Gide_ipiPD1_36	C2	SKCM	NA	783.01023	3994.00551	3831.94641	2691.9968	1696.9979	8.160863875	9.023697624	7.53898951	0	1.744010951	0	637	0.10116236	0.021563198	0	0.018334394	0	0.074593635	0.084532302	0.094174976	0.032523828	0	0.030165114	0	0.080248401	0	0.057694984	0.111467465	0	0.063289323	0.175569344	0.054680676	0	0	0.665675752	0	0	0.032523828	0.018334394	0.283466026	0	0	0.032523828	0.018334394	0.253300913
Gide_ipiPD1_Patient36_PRE	Gide_ipiPD1_36	C2	SKCM	NA	812.00043	1781.999324	1117.4991	3568.002	1921.00463	8.483544875	8.822715959	7.578754401	0	1.744010951	0	637	0.149390244	0.051875781	0	0	5.59E-05	0.076379477	0.072069797	0.05891256	0.060788831	0	0.019158683	0	0.020710764	0.039808493	0.055400146	0.165595123	0	0.127236972	0.085221391	0.017395865	0	0	0.712634779	0	5.59E-05	0.060788831	0	0.226520517	0	5.59E-05	0.060788831	0	0.207361834
Gide_ipiPD1_Patient37_PRE	Gide_ipiPD1_37	C3	SKCM	NA	795.00026	2768.997899	1051.50028	1628.5005	1272.99959	8.163432402	8.568188029	3.072788395	0	1.744010951	0	637	0.097082444	0	0.00725738	0	0	0.155229617	0.029832915	0.231828464	0.123385095	0	0.01831713	0.004731555	0	0.026634123	0.066922419	0.058806622	0.018892224	0.082144833	0.032800026	0.040044992	0.006090164	0	0.429417846	0.004731555	0	0.123385095	0.00725738	0.435208125	0.004731555	0	0.123385095	0.00725738	0.416890995
Gide_ipiPD1_Patient44_PRE	Gide_ipiPD1_44	C6	SKCM	NA	433.99996	1022.00009	497.4999	766.4999105	2331.99894	7.95886556	8.453297593	3.192121065	0	1.902806297	0	695	0.053904327	0.031994264	0	0.00614722	0	0.07375628	0.054075929	0.265444712	0.000925	0.060265064	0.018102527	0	0.051076653	0	0.064311593	0.07873866	0.017408648	0.03618042	0.128129757	0.058155706	0.001383437	0	0.521283464	0	0	0.061189869	0.00614722	0.411379448	0	0	0.061189869	0.00614722	0.39327692
Gide_ipiPD1_Patient45_PRE	Gide_ipiPD1_45	C4	SKCM	NA	2330.002	1884.648492	381.5002	2263.99575	6577.99804	7.700841687	8.943811052	1.782553927	0	1.973990418	0	721	0.047597303	0.011498642	0.030111384	0	0.001453111	0.181029627	0.041459021	0.16370319	0.177753181	0	0.011315205	0.01131187	0.02626484	0	0.097615222	0.038118639	0.057163392	0.005841926	0.037344399	0.060419045	0	0	0.381863409	0.01131187	0.001453111	0.177753181	0.030111384	0.397507044	0.01131187	0.001453111	0.177753181	0.030111384	0.386191838
Gide_ipiPD1_Patient46_PRE	Gide_ipiPD1_46	C2	SKCM	NA	2543.99771	5072.0033	2781.5013	3831.001	5469.00245	8.332270146	9.081985956	5.615014791	0	1.973990418	0	721	0.052071733	0.013533656	0.011244757	0	0	0.044278765	0.02164862	0.047886825	0.16897366	0	0.235922628	0.111910711	0.007670054	0	0.109182259	0.035399707	0.007651908	0.098145049	0	0.007816276	0.026663393	0	0.358134034	0.111910711	0	0.16897366	0.011244757	0.349736838	0.111910711	0	0.16897366	0.011244757	0.11381421
Gide_ipiPD1_Patient47_PRE	Gide_ipiPD1_47	C2	SKCM	NA	584.00062	1017.00032	767.9996901	1011.9998	1370.99956	7.506377182	8.378292201	0	0	2.004106776	0	732	0.197365822	0.00945771	0.017220863	0	0	0.017276276	0.02164199	0.079449258	0.027771293	0	0.027346099	0	0.031846205	0	0.193456727	0.014874277	0	0.129500742	0.124994211	0.075084788	0.029525712	0.003188027	0.809294222	0	0	0.027771293	0.017220863	0.145713622	0	0	0.027771293	0.017220863	0.118367523
Gide_ipiPD1_Patient49_PRE	Gide_ipiPD1_49	C3	SKCM	NA	552	585.00038	239.0004	305.49981	962.68571	6.775685063	9.197523186	3.204030368	0	2.12183436	0	775	0.092972817	0	0.005669557	0	0.003934699	0.126973392	0.073361028	0.132039127	0.101384513	0	0.008366554	0.002484925	0.026862602	0	0.141189009	0.032069324	0.050101468	0.048002972	0.0562656	0.079996945	0.013036607	0.00528886	0.545786203	0.002484925	0.003934699	0.101384513	0.005669557	0.340740102	0.002484925	0.003934699	0.101384513	0.005669557	0.332373548
Gide_ipiPD1_Patient50_PRE	Gide_ipiPD1_50	C2	SKCM	NA	953.99944	1160.96318	520.7644052	1983.9965	2831.0008	7.900460299	8.938523208	0.833880453	0	2.475017112	0	904	0.197240488	0.183419055	0.024762212	0	0	0.057061802	0.00715957	0.064573484	0.020460053	0	0	0	0	0.003887886	0.071683909	0.064798522	0.028671661	0.222440835	0.03125838	0.005066774	0.017515369	0	0.82598288	0	0	0.020460053	0.024762212	0.128794856	0	0	0.020460053	0.024762212	0.128794856
Gide_ipiPD1_Patient6_PRE	Gide_ipiPD1_6	C3	SKCM	NA	1756.3739	2012.00136	1155.49963	1265.4998	4018.0016	6.902937449	8.784142793	2.883935915	1	0.295687885	1	41	0.038932035	0.002821292	0	0	0	0.13561005	0.065914921	0.329369151	0.079977177	0	0.026546354	0.007572845	0.03733835	0	0.073676995	0.039462899	0.00314046	0.044156676	0.069732152	0.027479429	0.011288148	0.006981066	0.355009502	0.007572845	0	0.079977177	0	0.557440476	0.007572845	0	0.079977177	0	0.530894122
Gide_ipiPD1_Patient7_PRE	Gide_ipiPD1_7	C4	SKCM	NA	1299.9969	1596	435.50015	1131.49962	1962.15947	6.537834246	8.450522749	2.965200352	0	0.462696783	0	81	0.109801263	0	0.020807501	0.026011969	0.008694917	0.039043903	0.019171861	0.310526389	0.070784327	0	0.026003852	0.001235483	0.068779548	0	0.068849494	0.000741	0.113919579	0.024853721	0.049956495	0.031201928	0.003373322	0.006243277	0.477719797	0.001235483	0.008694917	0.070784327	0.04681947	0.394746005	0.001235483	0.008694917	0.070784327	0.04681947	0.368742153
Gide_ipiPD1_Patient8_PRE	Gide_ipiPD1_8	C1	SKCM	NA	592	295.00004	107.499985	296.499935	874.00013	6.736967831	8.158671022	2.086359449	0	1.744010951	1	81	0.120189384	0.015715176	0.015683354	0.034480508	0.004706002	0.064087012	0.02279133	0.259487973	0.013712737	0.067185169	0.026389268	0.000215	0	0.02958399	0.062361562	0.044080061	0.069254671	0.063285799	0.021268872	0.025300319	0.021441087	0.018781189	0.491262108	0.000215	0.004706002	0.080897906	0.050163862	0.372755583	0.000215	0.004706002	0.080897906	0.050163862	0.346366315
Gide_PD1_Patient10_EDT	Gide_PD1_10	C6	SKCM	NA	666.14916	948	390.49989	509.50039	1256.00001	7.267549435	8.704929958	4.45847098	0	1.508555784	1	76	0.134878683	0.006416808	0.000785	0	0.02091471	0.179111184	0.020024632	0.226147665	0.092838997	0	0.006557544	0	0.010280113	0	0.048649503	0.02507101	0.061162289	0.087692603	0.043900079	0.013148083	0.022420961	0	0.453620131	0	0.02091471	0.092838997	0.000785	0.431841025	0	0.02091471	0.092838997	0.000785	0.425283482
Gide_PD1_Patient10_PRE	Gide_PD1_10	C4	SKCM	NA	686.0004396	569.0003	110.0000057	420.49998	910.99983	6.734467491	8.505220037	3.869741005	0	1.508555784	1	76	0.079031777	0.045346438	0.000444	0.00718264	0	0.129765809	0.023402629	0.169131906	0.043155577	0.033339065	0.031470204	0	0.069696843	0	0.12566503	0	0.039262344	0.040574875	0.093876249	0.058459872	0.00365678	0.006538393	0.562108601	0	0	0.076494641	0.00762621	0.353770548	0	0	0.076494641	0.00762621	0.322300344
Gide_PD1_Patient11_PRE	Gide_PD1_11	C3	SKCM	NA	500.000236	639.99977	246.50016	365.00009	1160.00028	7.006099589	8.587525819	7.195776589	1	0.454483231	1	78	0.034788121	0.001760594	0	0.00748122	0	0.135582266	0.023658221	0.1959292	0.013608613	0	0.004841502	0.004074396	0.016847654	0	0.122137241	0.132208131	0	0	0.216839766	0.037506896	0.038177221	0.01455896	0.614824583	0.004074396	0	0.013608613	0.00748122	0.360011188	0.004074396	0	0.013608613	0.00748122	0.355169686
Gide_PD1_Patient12_PRE	Gide_PD1_12	C3	SKCM	NA	502.9999	513.0003	55.49999	260.500275	1921.00048	7.245502083	8.133181817	4.017016587	1	0.544832307	0	80	0.035835042	0.021989645	0	0.029026821	0.013572478	0.108616612	0.080219287	0.144424249	0.037067799	0	0.039390373	0	0.035188266	0	0.054598877	0.081483382	0	0.002260605	0.19149756	0.057532865	0.034441311	0.032854829	0.547682382	0	0.013572478	0.037067799	0.029026821	0.372650521	0	0.013572478	0.037067799	0.029026821	0.333260147
Gide_PD1_Patient13_EDT	Gide_PD1_13	C4	SKCM	NA	946.143	664.96503	101.00002	1756.00235	1528.0006	6.861909582	8.266950117	1.71277514	1	0.262833676	1	82	0.098399989	0.007403441	0.005958078	0.004934986	0.003108899	0.116017971	0.021030693	0.283630553	0.021829706	0.016175553	0.053461536	0.008148591	0	0.015902142	0.050340543	0.04019854	0.093910865	0.131940876	0	0.00350693	0.024100108	0	0.465703433	0.008148591	0.003108899	0.038005259	0.010893064	0.474140753	0.008148591	0.003108899	0.038005259	0.010893064	0.420679217
Gide_PD1_Patient13_PRE	Gide_PD1_13	C4	SKCM	NA	657	325.8429496	126.999855	625.499905	1235.79789	6.19577862	8.542906608	3.789967927	1	0.262833676	1	82	0.130314561	0.004140867	0.026221701	0.009111862	0.00266533	0.060671935	0.032623496	0.20163252	0.064625829	0	0.035640097	0	0	0.01060885	0.158404272	0.03382381	0.058245631	0.106796859	0.01979643	0.028843466	0.015832482	0	0.566807229	0	0.00266533	0.064625829	0.035333564	0.330568048	0	0.00266533	0.064625829	0.035333564	0.29492795
Gide_PD1_Patient14_PRE	Gide_PD1_14	C4	SKCM	NA	506.0004	404.00036	41.5	283.500145	1151.00008	7.075060561	7.797359896	2.844304433	1	2.718685832	1	83	0.100122313	0.013545892	0	0.016911125	0.008544501	0.070117453	0.034590445	0.254989771	0.039721419	0.01325424	0.038623509	0.000653	0.037198524	0	0.075991861	0.021657344	0.101819973	0.102247074	0.040786452	0.029225278	0	0	0.522594712	0.000653	0.008544501	0.052975659	0.016911125	0.398321178	0.000653	0.008544501	0.052975659	0.016911125	0.359697669
Gide_PD1_Patient15_PRE	Gide_PD1_15	C3	SKCM	NA	414.99965	440.3891745	181.4999	387.00015	1050.8805	6.927999205	8.260917851	5.727587875	1	0.821355236	1	84	0.077339945	0.066640487	0	0.018269093	0	0.10042618	0.097398113	0.111293374	0.02744981	0	0.018753367	0	0.046672492	0	0.069318026	0.110147825	0.007018302	0.141873004	0.031455126	0.048016336	0.02792852	0	0.626410063	0	0	0.02744981	0.018269093	0.327871034	0	0	0.02744981	0.018269093	0.309117667
Gide_PD1_Patient16_PRE	Gide_PD1_16	C4	SKCM	NA	519.00009	470.0003	25.5	392.500075	1795.99916	6.36049397	7.884333197	3.411860223	1	0.462696783	1	84	0.26424029	0.112876785	0.002626082	0	0	0.035972289	0.035344317	0.123161759	0.010770258	0	0.013993206	0	0.009354308	0.005092841	0.071757694	0.038041829	0.037918444	0.217997466	0.007159434	0.010791876	0.002901123	0	0.77813209	0	0	0.010770258	0.002626082	0.208471569	0	0	0.010770258	0.002626082	0.194478364
Gide_PD1_Patient17_EDT	Gide_PD1_17	C3	SKCM	NA	2033.9993	9700.00551	3173.782285	5960.4951	8996.998	8.087982917	8.21446596	3.008715357	1	0.706365503	1	96	0.064865005	0.013160616	0.022239946	0.103574825	0	0.011221816	0.020770078	0.196455919	0	0.188338529	0.02274924	0	0.001190664	0.019605795	0.02329388	0.064424011	0.145743483	0.095833649	0	0.006532543	0	0	0.434649646	0	0	0.188338529	0.125814771	0.251197053	0	0	0.188338529	0.125814771	0.228447813
Gide_PD1_Patient17_PRE	Gide_PD1_17	C6	SKCM	NA	866.6894	1549.96153	376.999745	877.99973	2401.9948	7.635743451	8.655786471	3.158258666	1	0.706365503	1	96	0.092078994	0.01826964	0.012100154	0.012274826	0.006579412	0.173225689	0.012326704	0.269990056	0.033830187	0.021032672	0.013333234	0	0	0.044291716	0.04654286	0.066175003	0.083896253	0.049365761	0.003826309	0.030449574	0.010410956	0	0.445307066	0	0.006579412	0.054862859	0.024374981	0.468875683	0	0.006579412	0.054862859	0.024374981	0.455542449
Gide_PD1_Patient18_PRE	Gide_PD1_18	C4	SKCM	NA	838.99964	1210.9978	162.50019	879.846343	3165.99826	7.24815254	9.03181812	1.937227772	1	0.624229979	1	100	0.170015473	0.075137562	0.015835519	0	0	0.019728754	0.004980042	0.06942545	0	0.00465387	0.003424228	0	0	0.019572129	0.033405528	0.08624788	0.08812909	0.407539064	0	0	0.00190541	0	0.881952137	0	0	0.00465387	0.015835519	0.097558474	0	0	0.00465387	0.015835519	0.094134246
Gide_PD1_Patient19_PRE	Gide_PD1_19	C4	SKCM	NA	778.0012	575.9999	25.499992	296.49978	1642.99477	6.631308333	8.11730771	2.49098166	1	1.054072553	0	125	0.200719745	0.049516298	0	0.009961788	0.011520056	0.042126327	0.05627861	0.135419698	0.044699369	0	0.025863628	0	0.034429674	0	0.065736954	0.054253979	0.07762037	0.031585393	0.106005605	0.054262506	0	0	0.674130524	0	0.011520056	0.044699369	0.009961788	0.259688263	0	0.011520056	0.044699369	0.009961788	0.233824635
Gide_PD1_Patient2_PRE	Gide_PD1_2	C3	SKCM	NA	558.99969	2001.999963	302.25565	487.000075	1661.00385	8.002715145	8.172832605	3.06203918	1	0.177960301	1	13	0.115425364	0	0	0.017721347	0.014038188	0.055562949	0.107569709	0.133717229	0.077470826	0	0.028743858	0	0.056918598	0.013348506	0.069833488	0.128611008	0.043039162	0.060199847	0.056323615	0.021476306	0	0	0.565175894	0	0.014038188	0.077470826	0.017721347	0.325593745	0	0.014038188	0.077470826	0.017721347	0.296849887
Gide_PD1_Patient21_PRE	Gide_PD1_21	C4	SKCM	NA	644.00003	1324.00224	59.000015	526.49981	1590.00019	6.756298355	8.21651332	0.854851236	1	1.508555784	0	166	0.086251602	0.012487072	0	0.004372302	0.003409468	0.238227484	0.028246936	0.222467303	0.039826066	0.012768002	0.00572809	0.02322986	0.009221991	0.017955062	0.081003745	0.029668678	0.052556874	0.095350799	0.002226683	0.008266902	0.018331413	0.00840367	0.42172449	0.02322986	0.003409468	0.052594068	0.004372302	0.494669813	0.02322986	0.003409468	0.052594068	0.004372302	0.488941723
Gide_PD1_Patient23_PRE	Gide_PD1_23	C4	SKCM	NA	615.99964	904.99961	169.999805	559.500415	2295.9972	7.802952714	8.827223258	6.052103517	1	0.5229295	0	191	0.070527819	0.051938294	0	0.047099701	0.012312516	0.009947212	0.027657953	0.226697187	0.109961879	0	0.060084278	0	0.019848316	0	0.096391209	0.029932691	0.027353835	0.073929069	0.031055206	0.071738065	0.026451816	0.007072955	0.506239274	0	0.012312516	0.109961879	0.047099701	0.32438663	0	0.012312516	0.109961879	0.047099701	0.264302352
Gide_PD1_Patient25_EDT	Gide_PD1_25	C3	SKCM	NA	604.99927	1872.999811	472.31965	1211.500125	1970.99994	8.371519391	8.752959463	4.574559916	1	2.455852156	0	271	0.115568777	0	0.014793957	0.007410173	0.014136577	0.052609143	0.017868314	0.234108959	0.070518339	0	0.034281209	0.003491312	0.0298997	0.005907518	0.082167102	0.04024077	0.126065691	0.09384993	0.017290308	0.039792221	0	0	0.550782017	0.003491312	0.014136577	0.070518339	0.02220413	0.338867624	0.003491312	0.014136577	0.070518339	0.02220413	0.304586416
Gide_PD1_Patient25_PRE	Gide_PD1_25	C6	SKCM	NA	818.0002	1262.0001	454.247735	523.499995	1962.140685	7.000055483	8.653881729	3.681938018	1	2.455852156	0	271	0.107280723	0.022764773	0	0.017887645	0.003592259	0	0.044109529	0.132853327	0.031663092	0	0.023357084	0	0.030537126	0	0.222854522	0.049765275	0.014298266	0.117233652	0.14207012	0.036254138	0	0.003478471	0.746537065	0	0.003592259	0.031663092	0.017887645	0.20031994	0	0.003592259	0.031663092	0.017887645	0.176962856
Gide_PD1_Patient27_PRE	Gide_PD1_27	C1	SKCM	NA	653	188.000096	74.000005	108.9781153	890.00032	5.930570837	8.422393962	1.510166259	1	2.92128679	0	314	0.067798786	0.025237034	0	0.028013512	0	0.116938245	0.106014651	0.139146532	0.033819916	0	0.040485606	0	0.069641226	0	0.04437042	0.133680509	0	0.037304212	0.078957558	0.061802351	0.016789441	0	0.535581537	0	0	0.033819916	0.028013512	0.402585035	0	0	0.033819916	0.028013512	0.362099429
Gide_PD1_Patient29_EDT	Gide_PD1_29	C4	SKCM	NA	656	331.9080358	54.5	965.9999424	903.00038	5.923054911	8.444114844	2.612373319	1	2.258726899	0	335	0.139222119	0.023971359	0	0.016560444	0	0.103060626	0.087436126	0.122328396	0.027556795	0	0.034229667	0	0.054263548	0	0.079891223	0.074922044	0.004908831	0.118779215	0.035431065	0.060096613	0.017341928	0	0.608827947	0	0	0.027556795	0.016560444	0.347054815	0	0	0.027556795	0.016560444	0.312825148
Gide_PD1_Patient29_PRE	Gide_PD1_29	C4	SKCM	NA	599.99973	232.9999164	12	287.500065	1046.99941	5.746896413	8.555125405	4.846882496	1	2.258726899	0	335	0.228690549	0	0.003382683	0.01352052	0.009616944	0	0.012126179	0.233144496	0.057391033	0	0.038901277	0.007100144	0	0.036102038	0.150057481	0	0.048254921	0.09843689	0	0.026858762	0.019226099	0.017189983	0.624816724	0.007100144	0.009616944	0.057391033	0.016903204	0.284171952	0.007100144	0.009616944	0.057391033	0.016903204	0.245270675
Gide_PD1_Patient3_PRE	Gide_PD1_3	C4	SKCM	NA	548	408.7383	42.50002454	328.999565	1279	6.073784773	8.341603505	4.611441218	1	0.161533196	1	23	0.106451661	0.034677546	0	0.012638118	0	0.06838246	0.081619545	0.10541593	0.026761455	0	0.036260549	0	0.044623307	0	0.040314363	0.093355566	0	0.132972488	0.152659011	0.032041454	0.028173005	0.003653543	0.668921944	0	0	0.026761455	0.012638118	0.291678484	0	0	0.026761455	0.012638118	0.255417935
Gide_PD1_Patient30_PRE	Gide_PD1_30	C4	SKCM	NA	3609.9996	2317.00517	151.5001	3757.99806	8084.99901	8.23039072	8.967731661	3.600835462	0	1.590691307	0	358	0.015734564	0.023436024	0	0.018100252	0.007085067	0.056624707	0.095064755	0.21508359	0.058009838	0	0.032575508	0.01960419	0.092593209	0	0.055333477	0.151975879	0	0.081376411	0.044794274	0.030450473	0.002157782	0	0.497852092	0.01960419	0.007085067	0.058009838	0.018100252	0.39934856	0.01960419	0.007085067	0.058009838	0.018100252	0.366773052
Gide_PD1_Patient34_PRE	Gide_PD1_34	C2	SKCM	NA	623.99966	1224.901	556.000115	1714.0008	1542.99618	7.687940814	8.495634926	2.826244211	1	2.403832991	0	544	0.061866463	0	0.009969642	0.032147227	0	0.139676718	0.036925122	0.29755076	0.093870208	0	0.047155818	0.014200692	0.008904771	0.009443887	0.027872692	0.045384406	0.096438086	0.028531881	0.023254008	0.026807619	0	0	0.328503812	0.014200692	0	0.093870208	0.04211687	0.521308418	0.014200692	0	0.093870208	0.04211687	0.4741526
Gide_PD1_Patient35_PRE	Gide_PD1_35	C2	SKCM	NA	434.99996	1126.99992	540.500335	1810.99785	1132.99982	7.981664971	8.708900846	5.500679991	0	2.986995209	0	586	0.028530199	0.085123661	0.008906422	0	0.000879	0.087375973	0.019489179	0.21001812	0.099441176	0	0.0269857	0.012894046	0.031371036	0	0.124621532	0.010726339	0.120068338	0.044355166	0.065529166	0.023685377	0	0	0.534010814	0.012894046	0.000879	0.099441176	0.008906422	0.343868972	0.012894046	0.000879	0.099441176	0.008906422	0.316883271
Gide_PD1_Patient36_PRE	Gide_PD1_36	C3	SKCM	NA	578.0006	798.9999	354.999721	419.999655	1055.99945	7.467681557	8.815749779	4.07271484	1	1.661875428	0	590	0.126511225	0.065192478	0.001200782	0.008194485	0	0.073075358	0.079710479	0.107823074	0.021463241	0.032176361	0.023986897	0	0.027904293	0	0.063640596	0.059085246	0.0666878	0.144660644	0.022777156	0.052960879	0.022949005	0	0.652369321	0	0	0.053639602	0.009395268	0.284595809	0	0	0.053639602	0.009395268	0.260608911
Gide_PD1_Patient38_PRE	Gide_PD1_38	C2	SKCM	NA	569.246658	2203.00361	986.717435	2532.9978	2298.644	8.057833436	8.636926025	0	0	4.235455168	0	755	0.208173252	0.034009229	0.00209758	0.039298051	0	0.031539385	0.073200071	0.072888586	0.007146256	0.093268271	0.016938139	0	0.008812152	0	0.055320856	0.02606421	0.053538798	0.229601059	0	0.032543748	0.015560354	0	0.663623659	0	0	0.100414527	0.041395631	0.194566182	0	0	0.100414527	0.041395631	0.177628043
Gide_PD1_Patient4_PRE	Gide_PD1_4	C3	SKCM	NA	2278.0015	5895.48933	2426.996963	3051.997305	4909.0023	7.588705641	9.285645052	4.65652017	1	0.060232717	1	23	0.08772123	0.054304559	0.034570564	0.002226582	0	0.064329432	0.028434373	0.257521791	0.052594119	0	0.014206988	0.073150533	0.009737753	0.016228286	0.084005072	0.056389844	0.015858937	0.08829999	0	0.047991928	0.012428017	0	0.472965617	0.073150533	0	0.052594119	0.036797146	0.364492585	0.073150533	0	0.052594119	0.036797146	0.350285597
Gide_PD1_Patient40_PRE	Gide_PD1_40	C3	SKCM	NA	628.74809	1981.99549	984.00025	1243	1643.999588	8.162061216	8.854369233	1.846053986	0	2.313483915	0	845	0.135120088	0.056576887	0.00501328	0	0	0.085657099	0.093789922	0.084507566	0.046372552	0	0.049157782	0	0.032061277	0	0.034725117	0.122095859	0.005783477	0.166665781	0.037780785	0.023715995	0.020976535	0	0.635501799	0	0	0.046372552	0.00501328	0.313112368	0	0	0.046372552	0.00501328	0.263954586
Gide_PD1_Patient41_EDT	Gide_PD1_41	C2	SKCM	NA	567	2281	1039.2976	1422.999785	1848.005024	7.989352562	9.194441552	2.688100169	0	2.425735797	0	870	0	0.098167029	0	0.014010433	0.002086557	0.121108792	0.106874061	0.171349898	0.038925195	0	0.008023662	0.007839601	0.016005022	0	0.159519107	0.088616433	0	0.059837463	0.086890602	0.00725936	0.004448736	0.009038049	0.529781801	0.007839601	0.002086557	0.038925195	0.014010433	0.407356414	0.007839601	0.002086557	0.038925195	0.014010433	0.399332752
Gide_PD1_Patient41_PRE	Gide_PD1_41	C4	SKCM	NA	778.99993	803.00055	135.00012	748.000518	1697	7.773863453	9.066163293	4.507682445	0	2.425735797	0	870	0.107551576	0.034264004	0.005811123	0	0	0.134857421	0.049753477	0.205426131	0.08416056	0	0	0.002365883	0.015340112	0	0.040407921	0.06031364	0.064106465	0.032576601	0.125930802	0.037134285	0	0	0.517625406	0.002365883	0	0.08416056	0.005811123	0.390037029	0.002365883	0	0.08416056	0.005811123	0.390037029
Gide_PD1_Patient42_PRE	Gide_PD1_42	C3	SKCM	NA	536.00035	529.00037	235.0003	493.499925	1573	7.611837312	8.916249724	3.729582581	0	2.439425051	0	891	0.07346211	0.039569961	0.01124499	0.000756	0	0.099823817	0.010436897	0.196834097	0.003486793	0.095336837	0.105531904	0	0.005845142	0.017685686	0.116834247	0.04637549	0.122578241	0.031699237	0.022498493	0	0	0	0.476548608	0	0	0.09882363	0.012001047	0.412626715	0	0	0.09882363	0.012001047	0.307094811
Gide_PD1_Patient44_PRE	Gide_PD1_44	C2	SKCM	NA	567.0001	2045.99991	1062.50015	1286.998285	1155.0006	8.536097193	8.740279049	4.41118566	0	2.943189596	0	1075	0.186799823	0.028154625	0.014039368	0	0.004772297	0.029999146	0.038249587	0.135257488	0.081766638	0	0.042234001	0	0.029854132	0	0.080078186	0.030857734	0.113476381	0.090760889	0.073057018	0.020642688	0	0	0.653681476	0	0.004772297	0.081766638	0.014039368	0.245740222	0	0.004772297	0.081766638	0.014039368	0.20350622
Gide_PD1_Patient45_PRE	Gide_PD1_45	C2	SKCM	NA	361.00016	1440.0008	904.4997607	1444.000315	867.27633	7.709111937	8.418341852	2.366717864	0	2.970568104	0	1085	0.063409742	0.036470389	0	0.01583563	0	0.05628194	0.13493091	0.137507534	0.037568322	0	0.024443067	0	0.031461617	0	0.087699273	0.090463337	0	0.071691286	0.147813802	0.059875461	0.001138989	0.0034087	0.593432596	0	0	0.037568322	0.01583563	0.353163452	0	0	0.037568322	0.01583563	0.328720385
Gide_PD1_Patient46_PRE	Gide_PD1_46	C2	SKCM	NA	739	1055.00426	511.500165	1451.000765	1621.0012	7.200858572	8.905594932	3.849376622	0	3.006160164	0	1098	0.102474176	0.06108526	0.004378782	0.005146588	0.001701246	0.204649394	0.031251527	0.131884815	0.071147113	0	0.002735386	0	0	0.013637971	0.047260544	0.070710215	0.123308447	0.101069868	0.008988287	0.010381117	0.008189264	0	0.547105148	0	0.001701246	0.071147113	0.00952537	0.370521123	0	0.001701246	0.071147113	0.00952537	0.367785737
Gide_PD1_Patient47_EDT	Gide_PD1_47	C4	SKCM	NA	507.00047	1508.999	479.00006	1062.000215	661.33644	7.402869706	8.743991996	3.701384646	0	3.214236824	0	1174	0.056055135	0.030739987	0.013872859	0.021368268	0	0.028898914	0.062336657	0.306453707	0.02312301	0.090251708	0.019216942	0	0.032880982	0	0.028574679	0.026284325	0.180979196	0.017876928	0.007874845	0.036510584	0.016701272	0	0.434477934	0	0	0.113374718	0.035241127	0.41690622	0	0	0.113374718	0.035241127	0.397689278
Gide_PD1_Patient47_PRE	Gide_PD1_47	C3	SKCM	NA	494.00033	2342.99801	583.9996845	1262.00035	1175.09222	7.155041944	8.200183739	3.660625076	0	3.214236824	0	1174	0.11739317	0	0.017111016	0	0.001804531	0.050354563	0.062937826	0.205711315	0.119100935	0	0.018408738	0.007942156	0.03737499	0	0.140677851	0.042893869	0.04212839	0.089810973	0.019696412	0.019829732	0.006823533	0	0.51662892	0.007942156	0.001804531	0.119100935	0.017111016	0.337412441	0.007942156	0.001804531	0.119100935	0.017111016	0.319003703
Gide_PD1_Patient48_EDT	Gide_PD1_48	C2	SKCM	NA	489.9996316	3028.00144	2516.342174	1640.49905	770.33222	7.786863165	9.542377288	2.107291987	0	3.255304586	0	1189	0.138441068	0.076952235	0	0	0.001610171	0.160772497	0.025044677	0.165166804	0.016068516	0.007956111	0.014479061	0	0.004562749	0.021359627	0.071542206	0.069425117	0.03412342	0.156704396	0.030186047	0.005605299	0	0	0.608902164	0	0.001610171	0.024024627	0	0.365463038	0	0.001610171	0.024024627	0	0.350983977
Gide_PD1_Patient48_PRE	Gide_PD1_48	C2	SKCM	NA	741	1884.99797	1817.834115	4016.002125	2179	8.447561221	8.929655294	2.275299763	0	3.255304586	0	1189	0.059498529	0.013492811	0.003639632	0.009745737	0.003462228	0.050247434	0.069601414	0.272193679	0.036130319	0	0.014892441	0.001264837	0.029381575	0	0.062672522	0.085408922	0.029931098	0.021533991	0.158675575	0.077130562	0.001096693	0	0.538822278	0.001264837	0.003462228	0.036130319	0.01338537	0.406934969	0.001264837	0.003462228	0.036130319	0.01338537	0.392042527
Gide_PD1_Patient49_PRE	Gide_PD1_49	C4	SKCM	NA	612.5655	637	183.50003	530.000495	1613.00233	6.987342725	8.947672076	2.682599406	0	3.635865845	0	1328	0.15985867	0.088600992	0.005872205	0.029053456	0.00764059	0.03442681	0.016500535	0.114644614	0.04870075	0	0.015327396	0.002830565	0	0.022608149	0.103377859	0.098323709	0.093473864	0.14220684	0.013773909	0.002779088	0	0	0.725003079	0.002830565	0.00764059	0.04870075	0.034925661	0.180899356	0.002830565	0.00764059	0.04870075	0.034925661	0.165571959
Gide_PD1_Patient5_PRE	Gide_PD1_5	C4	SKCM	NA	569.99982	365.9997	126.5	751.00055	839.7989942	6.421919025	8.539352307	0.964879369	1	0.424366872	1	39	0.058180274	0.023640373	0.025951315	0	0	0.091663127	0.018858594	0.154934641	0.208135763	0	0.047059252	0.045103121	0.009128428	0.009610861	0.094555877	0.026486309	0.106165216	0.072419682	0	0.008107167	0	0	0.408294187	0.045103121	0	0.208135763	0.025951315	0.312515615	0.045103121	0	0.208135763	0.025951315	0.265456363
Gide_PD1_Patient50_PRE	Gide_PD1_50	C3	SKCM	NA	628.00038	645.001204	229.5393445	780.9999	2037.00509	7.681979088	8.7030217	2.005426868	0	3.674195756	0	1342	0.077969329	0.002887899	0	0.023308882	0	0.188160568	0.057098265	0.13794774	0.043291267	0.064520633	0.010973484	0	0	0.012199368	0.055512357	0.050391654	0.048622717	0.14791681	0.030469075	0.039057847	0.009672103	0	0.474699158	0	0	0.107811901	0.023308882	0.394180059	0	0	0.107811901	0.023308882	0.383206574
Gide_PD1_Patient52_PRE	Gide_PD1_52	C4	SKCM	NA	651.00012	1349.75208	418.499615	1545.9985	1333	7.722438437	8.522872412	2.217116049	0	4.251882272	0	1553	0.07492727	0.009838972	0	0.015344246	0.001016519	0.304068271	0.021246525	0.225084383	0.035758414	0.03018886	0.004282301	0	0.001013198	0	0.067132722	0.020453856	0.031739302	0.104469099	0.000385	0.032350324	0.019026464	0.001674398	0.363010481	0	0.001016519	0.065947274	0.015344246	0.55468148	0	0.001016519	0.065947274	0.015344246	0.550399179
Gide_PD1_Patient53_PRE	Gide_PD1_53	C3	SKCM	NA	344.4132	1207.91217	1454.49935	553.4999	877.22306	7.634261067	8.927628498	4.806282592	0	4.350444901	0	1589	0.110391478	0	0.005000489	0.083925372	0	0.069517676	0.006704887	0.101472247	0.00156817	0.29909638	0.030698897	0	0	0	0.045959066	0.027159393	0.074701171	0.109215127	0	0.02031037	0.014279276	0	0.402015881	0	0	0.30066455	0.088925861	0.208393708	0	0	0.30066455	0.088925861	0.17769481
Gide_PD1_Patient54_PRE	Gide_PD1_54	C2	SKCM	NA	714.00075	722.99954	366.50045	750.999435	882.999872	8.029405857	8.317539407	3.012693796	0	4.388774812	0	1603	0.057948459	0.005503829	0	0	0	0.19462467	0.02117858	0.22734638	0.103648764	0	0.041799097	0	0	0.046696615	0.037005071	0.055792576	0	0.166775738	0	0.016746246	0.024933974	0	0.411402508	0	0	0.103648764	0	0.484948728	0	0	0.103648764	0	0.44314963
Gide_PD1_Patient6_PRE	Gide_PD1_6	C2	SKCM	NA	573.0003	1210.7819	1256.4985	646.9998937	577.00023	7.638978613	8.339282113	6.047483256	1	0.257357974	1	42	0.132527424	0	0.016619053	0.021352423	0.005550439	0.061029833	0.017950799	0.186068719	0.033799362	0.084586653	0.035094253	0	0	0.029335533	0.15013524	0.016044371	0.024419957	0.08842154	0.014380236	0.062245192	0.020438975	0	0.537948466	0	0.005550439	0.118386015	0.037971477	0.300143604	0	0.005550439	0.118386015	0.037971477	0.26504935
Gide_PD1_Patient7_PRE	Gide_PD1_7	C4	SKCM	NA	725.0004	2443.0037	633.49982	1371.49955	1723.99982	8.185577978	8.355649036	1.904830769	1	0.219028063	1	47	0.113778263	0	0.007533811	0.01463124	0	0.028004409	0.00914703	0.197395926	0.190104954	0	0.0372114	0	0.09466724	0	0.124018771	0.049728011	0	0.079248468	0	0.049377865	0.005152613	0	0.515971231	0	0	0.190104954	0.022165051	0.271758764	0	0	0.190104954	0.022165051	0.234547364
Gide_PD1_Patient8_EDT	Gide_PD1_8	C4	SKCM	NA	3103.9959	3083.330535	650.0001275	4125.00058	6707.1193	7.618464507	8.513705317	2.701027364	1	0.158795346	1	58	0.107421617	0.020284976	0.01953137	0.030995408	0.019434974	0.018794836	0.003865846	0.167201016	0.068937051	0	0.015640841	0	0	0.014925337	0.25078957	0.016040454	0	0.178348838	0.033126458	0.024803776	0.00985763	0	0.655598658	0	0.019434974	0.068937051	0.050526777	0.205502539	0	0.019434974	0.068937051	0.050526777	0.189861698
Gide_PD1_Patient8_PRE	Gide_PD1_8	C4	SKCM	NA	3092.9994	674.9999	148.999885	1163.50151	4100	7.366322435	8.663085252	3.59764639	1	0.158795346	1	58	0.111954376	0	0.016837107	0	0.011699528	0.236111256	0.003669767	0.330965435	0	0.045522374	0.002720239	0.024061498	0	0.045243898	0.047184316	0.014512562	0.052551134	0.029047521	0	0.02791899	0	0	0.328412796	0.024061498	0.011699528	0.045522374	0.016837107	0.573466697	0.024061498	0.011699528	0.045522374	0.016837107	0.570746458
Gide_PD1_Patient9_PRE	Gide_PD1_9	C3	SKCM	NA	479.9995	1094.9998	654	354.000095	1587.9977	7.737579046	8.67938299	6.28804132	1	0.271047228	1	71	0.028423565	0.003202157	0.004761546	0.000222	0.001483376	0.047794559	0.064517126	0.242622002	0.026955909	0	0.057836415	0.033793959	0.060759601	0	0.093122321	0.086058127	0.078334044	0.04912936	0.098622189	0.022361408	0	0	0.52001277	0.033793959	0.001483376	0.026955909	0.004983883	0.412770102	0.033793959	0.001483376	0.026955909	0.004983883	0.354933687
Hugo_Pt1	Hugo_Pt1	C3	SKCM	SKCM.RAS	2903.00008	2235	1005.999945	1510.00005	9444.14058	7.189782305	8.350246259	7.383373057	1	1.661875428	NA	NA	0.017556107	0.016986552	0	0.024473937	0	0.034314823	0.048390336	0.25244584	0	0.106525736	0.048921809	0	0.067781267	0	0.05863957	0	0.10241968	0	0.118374949	0.055409935	0	0.047759457	0.484927518	0	0	0.106525736	0.024473937	0.384072809	0	0	0.106525736	0.024473937	0.335150999
Hugo_Pt10	Hugo_Pt10	C4	SKCM	SKCM.TripleWt	3136.60865	1234.989627	19.999995	890.0001875	13591.98983	7.893399352	8.280554442	4.907279368	0	1.059548255	NA	NA	0.033849593	0	0	0.012466895	0.019302644	0.320341078	0.01226083	0.148620207	0	0.039326903	0.052918652	0.049365471	0.023958317	0.036203253	0.020316049	0.009939161	0.116922703	0	0	0.104208243	0	0	0.345397319	0.049365471	0.019302644	0.039326903	0.012466895	0.534140767	0.049365471	0.019302644	0.039326903	0.012466895	0.481222115
Hugo_Pt12	Hugo_Pt12	C4	SKCM	SKCM.BRAF	2373.00231	921.00059	42.000005	1808.00109	8016.00213	6.700190168	8.471394549	9.760921672	1	0.895277207	NA	NA	0.006669897	0.014076459	0	0	0.015044122	0.256432742	0.036043592	0.324148431	0.061594425	0.044213527	0.030062343	0.011061626	0	0.01984147	0	0	0.069152639	0	0.046566651	0.040419636	0	0.02467244	0.221399191	0.011061626	0.015044122	0.105807952	0	0.646687109	0.011061626	0.015044122	0.105807952	0	0.616624765
Hugo_Pt13	Hugo_Pt13	C3	SKCM	SKCM.TripleWt	2344.9966	3507.874678	602.49991	2151.499975	11755.0328	7.195054887	8.359849599	3.353184893	0	2.510609172	NA	NA	0	0.015502546	0	0	0.002642117	0.026504981	0.057468732	0.269991259	0.042062908	0	0.135355065	0.000549	0.028497614	0	0.009810982	0.035727567	0.051463123	0	0.23556238	0.051624459	0	0.037237386	0.465426057	0.000549	0.002642117	0.042062908	0	0.489320037	0.000549	0.002642117	0.042062908	0	0.353964972
Hugo_Pt14	Hugo_Pt14	C2	SKCM	SKCM.BRAF	5120.8452	2452	159.499825	6606.5025	12409.95109	6.719382463	8.520895871	1.812785436	0	0.147843943	NA	NA	0.001420134	0.004237071	0	0.000226	0	0	0.055031792	0.426889036	0.180759936	0	0.03817457	0.027705336	0.035618727	0	0.01925717	0	0.104964583	0	0.079501078	0.026214423	0	0	0.271213186	0.027705336	0	0.180759936	0.000226	0.520095399	0.027705336	0	0.180759936	0.000226	0.481920828
Hugo_Pt15	Hugo_Pt15	C4	SKCM	SKCM.RAS	1995.8631	1373.999884	444.50041	1573.999375	2837.00415	7.5906302	8.918683845	2.498546675	1	2.683093771	NA	NA	0.064343071	0.01737606	0	0.00178471	0.000179	0.042919281	0.070382345	0.333821432	0.000948	0.002187133	0.03615713	0.003058511	0.032009589	0	0.085620829	0.011852104	0	0	0.166546366	0.104417552	0.01004568	0.016351132	0.508562383	0.003058511	0.000179	0.00313475	0.00178471	0.483280188	0.003058511	0.000179	0.00313475	0.00178471	0.447123058
Hugo_Pt16	Hugo_Pt16	C4	SKCM	SKCM.BRAF	1621.99943	1247	143.500285	1047.00085	4870.6449	8.497446508	8.194813276	3.015716282	1	0.509240246	NA	NA	0.005395303	0.004875697	0.030301824	0	0	0.219419557	0.006282957	0.178008683	0.028814477	0	0.137443217	0.213742613	0.00209272	0.022596488	0.045393853	0.006485477	0.028286624	0.026219694	0.035877803	0.007148838	0	0.001614174	0.185986672	0.213742613	0	0.028814477	0.030301824	0.541154414	0.213742613	0	0.028814477	0.030301824	0.403711197
Hugo_Pt19	Hugo_Pt19	C1	SKCM	SKCM.RAS	1161.99696	559.33995	403.49985	186.500045	3445.96074	6.460837444	8.406489786	5.362906517	0	2.902121834	NA	NA	0.071170719	0.016068458	0	0.003789237	0	0.204569911	0.032342442	0.183942386	0.00166177	0.010911028	0.036459775	0	0.053107254	0	0.058447028	0	0	0	0.16520204	0.096994618	0	0.065333334	0.526323451	0	0	0.012572798	0.003789237	0.457314514	0	0	0.012572798	0.003789237	0.420854739
Hugo_Pt2	Hugo_Pt2	C3	SKCM	SKCM.NF1	1283.0031	1002.99964	193.50007	1208.49828	2594.99625	6.490117978	7.510400072	9.416572185	0	2.53798768	NA	NA	0.01356988	0.005207526	0	0.007587898	0.005694351	0.056500336	0.057253635	0.342066603	0.032915122	0	0.072164859	0.023132134	0.042495761	0	0.008957908	0	0.124909418	0	0.128529292	0.05444011	0	0.024575166	0.402685062	0.023132134	0.005694351	0.032915122	0.007587898	0.527985434	0.023132134	0.005694351	0.032915122	0.007587898	0.455820575
Hugo_Pt20	Hugo_Pt20	C3	SKCM	SKCM.RAS	1199.54941	2527.9977	2332.497575	1662.0036	1898.00429	8.007955682	8.119902866	9.54402316	1	0.922655715	NA	NA	0.016992472	0.01471984	0	0.020163439	0	0.056346444	0.086078026	0.106825002	0	0.009749222	0.020244768	0	0.058826076	0	0.099821444	0.031867162	0	0	0.341654501	0.107844071	0	0.028867533	0.700593098	0	0	0.009749222	0.020163439	0.269494241	0	0	0.009749222	0.020163439	0.249249473
Hugo_Pt22	Hugo_Pt22	C3	SKCM	SKCM.BRAF	2549.999	4653.0025	1431.500155	1737.501	10275.26435	8.03805995	8.367752664	3.647968712	1	0.498288843	NA	NA	0.030601774	0	0	0.022154236	0.001171953	0.015136957	0.097525244	0.285946207	0	0.074689875	0.0856003	0	0.046455296	0	0.061336449	0	0.096800999	0	0.117867329	0.037611897	0	0.027101485	0.417775228	0	0.001171953	0.074689875	0.022154236	0.484208708	0	0.001171953	0.074689875	0.022154236	0.398608408
Hugo_Pt23	Hugo_Pt23	C4	SKCM	SKCM.BRAF	2572.0042	2812.002	352.9997308	5046.001	5463.88936	7.737035202	8.047191946	2.67218484	1	0.281998631	NA	NA	0.009332742	0.003371759	0	0.015455392	0.004406014	0.063357854	0.069045183	0.407317294	0.000979	0.018318241	0.046919173	0.03180841	0.046712225	0	0.005522776	0.016244253	0	0	0.178072686	0.069646245	0	0.013490796	0.342393482	0.03180841	0.004406014	0.019297196	0.015455392	0.586639505	0.03180841	0.004406014	0.019297196	0.015455392	0.539720332
Hugo_Pt25	Hugo_Pt25	C2	SKCM	SKCM.TripleWt	1418.00079	1194.307	749.999585	603.99975	2824	7.232702906	7.949736866	1.854433004	1	0.717316906	NA	NA	0.048024886	0	0	0.020679924	0	0	0.069893539	0.192653582	0	0.02440593	0.066949438	0	0.089806505	0	0.034522024	0	0.040658326	0	0.281572071	0.064846035	0	0.065987741	0.625417588	0	0	0.02440593	0.020679924	0.329496558	0	0	0.02440593	0.020679924	0.262547121
Hugo_Pt27a	Hugo_Pt27	C2	SKCM	SKCM.RAS	2751.99932	2561.002062	431.9998	2563.002	7249.99956	6.177812062	8.460844383	2.371661622	0	1.500342231	NA	NA	0	0.032463578	0	0.004894937	0.000296	0	0.088274189	0.332117658	0.000784	0.004881042	0.084659403	0.002013134	0.046731908	0	0.026834781	0.021554922	0.03718894	0	0.215276462	0.069563521	0	0.032465998	0.48208011	0.002013134	0.000296	0.005664595	0.004894937	0.50505125	0.002013134	0.000296	0.005664595	0.004894937	0.420391847
Hugo_Pt27b	Hugo_Pt27	C4	SKCM	SKCM.RAS	2254.99551	1608.34284	144.499785	1576.00226	4464.99526	5.358446157	7.826120353	2.111989297	0	1.500342231	NA	NA	0.007648286	0.011289487	0	0.008472402	0	0	0.113198649	0.398279363	0.001304584	0.006532889	0.111114859	0.004961736	0.040453456	0	0.02103513	0.013967273	0.064143952	0	0.106594451	0.059420225	0	0.031583257	0.356135517	0.004961736	0	0.007837474	0.008472402	0.622592872	0.004961736	0	0.007837474	0.008472402	0.511478012
Hugo_Pt28	Hugo_Pt28	C1	SKCM	SKCM.NF1	1511.99968	486.0004	226.49995	908.9999	3260.9955	6.030119902	8.032402109	7.308235265	1	1.201916496	NA	NA	0.038256634	0	0.080542544	0.021880362	0	0.208349279	0.002606004	0.134171051	0.012837132	0.062343991	0	0.028216294	0.007183517	0	0.007202978	0	0.043655035	0	0.082595346	0.173073674	0	0.097086158	0.449053342	0.028216294	0	0.075181122	0.102422906	0.345126335	0.028216294	0	0.075181122	0.102422906	0.345126335
Hugo_Pt29	Hugo_Pt29	C2	SKCM	SKCM.TripleWt	2111.00308	2170	712.5002	1010.995735	4147.99463	8.513242283	8.550899567	7.185424344	1	0.736481862	NA	NA	0	0.050864608	0	0.013726974	0	0	0.082826742	0.293888695	0.004082676	0.003597922	0.041584513	0.009290379	0.048287531	0	0.044085347	0.015726635	0.073895465	0	0.190493553	0.103512649	0	0.02413631	0.551002098	0.009290379	0	0.007680599	0.013726974	0.41829995	0.009290379	0	0.007680599	0.013726974	0.376715437
Hugo_Pt31	Hugo_Pt31	C2	SKCM	SKCM.BRAF	1567.987	687.9995402	240.000175	993.499955	4347.99632	7.724876278	7.34861873	2.627918209	0	1.927446954	NA	NA	0.007336929	0.028996315	0.010902453	0	0	0.182378062	0.045107185	0.214615567	0.006962133	0	0.058922277	0.00137043	0.062630415	0.006768267	0.059591175	0	0.089503845	0	0.12215565	0.056969568	0	0.045789729	0.479741894	0.00137043	0	0.006962133	0.010902453	0.50102309	0.00137043	0	0.006962133	0.010902453	0.442100813
Hugo_Pt32	Hugo_Pt32	C1	SKCM	SKCM.BRAF	1320.895605	686	181.00002	545.49999	4481.98501	6.408395998	8.995470047	3.324061464	1	0.468172485	NA	NA	0.032715733	0	0	0	0	0.164152707	0.027234613	0.227209897	0	0.012962502	0.080565768	0.001042947	0.058406308	0	0.019655114	0	0.179061927	0	0.158362064	0.02204574	0	0.016584681	0.486831566	0.001042947	0	0.012962502	0	0.499162985	0.001042947	0	0.012962502	0	0.418597217
Hugo_Pt35	Hugo_Pt35	C1	SKCM	SKCM.BRAF	2430.03897	993.9993	154.4997947	1341.992731	4717.99819	5.85260952	9.079396084	5.078688401	0	1.169062286	NA	NA	0	0.020381386	0	0.004588452	0	0.029120677	0.057107253	0.309205625	0.005280597	0	0.060029858	0.002642867	0.06124184	0	0.021672185	0.024540107	0.03473263	0	0.246179387	0.10124902	0	0.022028117	0.532024672	0.002642867	0	0.005280597	0.004588452	0.455463412	0.002642867	0	0.005280597	0.004588452	0.395433554
Hugo_Pt37	Hugo_Pt37	C3	SKCM	SKCM.BRAF	1551.00016	514.00046	426.499995	525.49964	2366.85992	6.065757679	7.990025422	4.029281441	0	0.996577687	NA	NA	0.005304404	0.00469342	0	0.003421562	0	0.033589583	0.044949302	0.206988713	0.008363443	0.004093605	0.042900882	0	0.098282565	0	0.10615778	0.000692	0.029497992	0	0.258563631	0.082441045	0.011718257	0.058341733	0.655692911	0	0	0.012457048	0.003421562	0.328428479	0	0	0.012457048	0.003421562	0.285527597
Hugo_Pt38	Hugo_Pt38	C2	SKCM	SKCM.TripleWt	1626.9998	4009.00424	4843.78128	3455.001435	3540.002	8.141985657	8.181547798	4.736125001	0	1.226557153	NA	NA	0.226461309	0.249513444	0.009628239	0	0	0.056151337	0.024259843	0.073255262	0	0.000116	0	0.000476	0.005247186	0	0.103296376	0.023176582	0.037090681	0	0.09839484	0.065550875	0.003999339	0.023382298	0.83611293	0.000476	0	0.000116	0.009628239	0.153666442	0.000476	0	0.000116	0.009628239	0.153666442
Hugo_Pt4	Hugo_Pt4	C4	SKCM	SKCM.BRAF	2512.9986	1376.99511	395.999995	562.49965	5742.0026	6.434267805	8.047088824	3.027424846	0	2.595482546	NA	NA	0.023617693	0.019349509	0	0.010201386	0	0.006917972	0.047633989	0.273492355	0.00357853	0.00171556	0.202859364	0.045752427	0.048209471	0	0.033202084	0.005011072	0.057360904	0	0.132959928	0.075686509	0	0.012451247	0.407848416	0.045752427	0	0.005294091	0.010201386	0.530903681	0.045752427	0	0.005294091	0.010201386	0.328044316
Hugo_Pt5	Hugo_Pt5	C4	SKCM	SKCM.BRAF	2698.00063	417.9996506	13.000022	900.499895	4648.00428	4.592228849	7.479181619	2.017488669	0	1.201916496	NA	NA	0.001839756	0.025521795	0.013480922	0.011181032	0.003084366	0.076658214	0.016085901	0.505081805	0	0.04524794	0.036622773	0.010074478	0	0.018787131	0.013231927	0.01359561	0.04343102	0	0.057564703	0.074651573	0.013862069	0.019996985	0.282482569	0.010074478	0.003084366	0.04524794	0.024661953	0.634448693	0.010074478	0.003084366	0.04524794	0.024661953	0.59782592
Hugo_Pt6	Hugo_Pt6	C4	SKCM	SKCM.BRAF	2795.99544	2465.004	54.49996	876.500105	5494.99731	6.379641562	7.029055274	4.242741454	0	2.414784394	NA	NA	0.009391843	0.017030278	0.025524433	0.00269939	0.007628539	0.051612819	0.006404665	0.466274585	0	0.032570064	0.091529483	0.104128017	0	0.047535113	0.001202068	0.006378253	0.035069171	0.07054555	0.018413514	0	0	0.006062216	0.211628005	0.104128017	0.007628539	0.032570064	0.028223823	0.615821553	0.104128017	0.007628539	0.032570064	0.028223823	0.52429207
Hugo_Pt7	Hugo_Pt7	C4	SKCM	SKCM.TripleWt	1864.89	569.00025	78.00003	494.50023	3285.00987	5.973179306	8.360573661	3.665160449	1	1.812457221	NA	NA	0.053077821	0	0	0	0.006264571	0.282934567	0.067309218	0.251067951	0.00350667	0.00933915	0	0.005596533	0	0.031963111	0.037191786	0.037540283	0	0	0.105537637	0.082272208	0	0.026398495	0.37398134	0.005596533	0.006264571	0.012845819	0	0.601311737	0.005596533	0.006264571	0.012845819	0	0.601311737
Hugo_Pt8	Hugo_Pt8	C4	SKCM	SKCM.BRAF	987.001	499.99978	53.50003517	620.99995	2222.00112	6.636013369	8.073208561	4.713346168	0	NA	NA	NA	0.028939008	0	0	0.007525727	0	0.083802671	0.070484046	0.373454863	0.023276348	0.006244625	0.070959726	0.007312258	0.023419703	0	0.021962769	0	0.070106882	0	0.131629482	0.060609456	0	0.020272437	0.356939737	0.007312258	0	0.029520973	0.007525727	0.598701306	0.007312258	0	0.029520973	0.007525727	0.52774158
Hugo_Pt9	Hugo_Pt9	C3	SKCM	SKCM.BRAF	2745.0218	1824.9954	875.00015	2009.496695	6069.99905	6.044968244	8.232933338	5.754179821	0	2.88569473	NA	NA	0.024298674	0.011890393	0	0.007846707	0	0	0.093400747	0.254031924	0	0.047019179	0.062179542	0	0.057464739	0	0.099213503	0	0.018351692	0	0.210893433	0.079037905	0	0.034371562	0.535521901	0	0	0.047019179	0.007846707	0.409612213	0	0	0.047019179	0.007846707	0.347432671
Riaz_Pt1_On	Riaz_Pt1	C4	SKCM	SKCM.NA	1860.443	1455.13034	255.9091109	1111.998195	1939.636734	7.221142278	9.454936156	8.482478366	1	0.438056126	NA	NA	0.020181305	0.001499754	0	0.004803299	0	0.14278471	0.071021224	0.392463974	0.010133187	0	0.017378195	0.020344207	0	0.01548088	0.050907694	0.09253694	0.021608996	0	0.110752412	0.020990724	0.0071125	0	0.341071204	0.020344207	0	0.010133187	0.004803299	0.623648103	0.020344207	0	0.010133187	0.004803299	0.606269908
Riaz_Pt1_Pre	Riaz_Pt1	C4	SKCM	SKCM.NA	1788.773	2832.9964	891.000696	2921.444815	2210.0058	7.094304457	9.090079191	9.393687739	1	0.438056126	NA	NA	0.006867739	0.024194698	0	0.040787032	0.009890601	0.036470892	0.085107867	0.333750017	0	0.024568251	0.056410373	0.015266428	0.010972715	0	0.030542781	0.112368544	0.002823992	0	0.16102699	0.037018561	0.000697	0.011235243	0.397748539	0.015266428	0.009890601	0.024568251	0.040787032	0.511739149	0.015266428	0.009890601	0.024568251	0.040787032	0.455328776
Riaz_Pt10_On	Riaz_Pt10	C4	SKCM	SKCM.NF1	1984	2407.00171	205.99987	1281.50021	4560.10298	7.514033837	8.594091877	3.85257893	1	0.700889801	NA	NA	0.010979576	0.004975846	0	0.032348809	0.004860118	0.1383652	0.060129696	0.491267536	0.014173573	0	0.063330013	0.034754632	0.012127778	0	0.023832482	0.013325998	0.029568145	0	0.040867209	0.017293017	0.006356209	0.001444164	0.160770423	0.034754632	0.004860118	0.014173573	0.032348809	0.753092445	0.034754632	0.004860118	0.014173573	0.032348809	0.689762432
Riaz_Pt10_Pre	Riaz_Pt10	C4	SKCM	SKCM.NF1	3463.997069	1175.0006	171.999985	1682.50045	4190	5.664854193	8.429381582	2.70731534	1	0.700889801	NA	NA	0.087010674	0.016986309	0	0.004569672	0	0.059327288	0.045011252	0.533354255	0	0.038332708	0.038206974	0.005673748	0.011783018	0.000235	0.044093191	0.009470732	0.039023446	0	0.041196941	0.021345058	0.004379917	0	0.275524103	0.005673748	0	0.038332708	0.004569672	0.675899769	0.005673748	0	0.038332708	0.004569672	0.637692795
Riaz_Pt101_On	Riaz_Pt101	C2	SKCM	SKCM.TripleWt	1989.00172	7411.85434	10056.2482	3495.50165	3518.0033	7.975581292	8.416573096	6.368031747	0	2.283367556	NA	NA	0.178107553	0.182191936	0.00023	0	0	0.046030282	0.052686091	0.104260918	0	0.029928261	0.009579839	0.00860607	0.003384366	0	0.05109052	0.059198339	0.014132319	0.06475502	0.109456043	0.057487329	0	0.028874888	0.748678313	0.00860607	0	0.029928261	0.00023	0.212557129	0.00860607	0	0.029928261	0.00023	0.202977291
Riaz_Pt101_Pre	Riaz_Pt101	C2	SKCM	SKCM.TripleWt	1706.1873	5937.0035	8622.001011	3810.50105	2104.004	7.907424464	8.282769238	6.054766925	0	2.283367556	NA	NA	0.249194637	0.176322402	0	0	0	0.055322874	0.047011613	0.090514277	0	0.025644929	0	0.021571385	0.003625302	0	0.018535106	0.059486535	0	0.057468545	0.099012426	0.052906169	0.009664952	0.033718849	0.759934922	0.021571385	0	0.025644929	0	0.192848764	0.021571385	0	0.025644929	0	0.192848764
Riaz_Pt103_On	Riaz_Pt103	C4	SKCM	SKCM.TripleWt	1434.99913	525.99997	118.9999908	369.9998002	3479.0005	5.494782043	8.393837034	5.973436977	0	1.325119781	NA	NA	0.079245123	0	0	0.058939126	0	0.015119804	0.057774683	0.359506506	0	0.109300461	0.0197175	0.006080062	0.015621954	0.000118	0.044696563	0.014636416	0.066140812	0	0.078557915	0.074544658	0	0	0.373561857	0.006080062	0	0.109300461	0.058939126	0.452118494	0.006080062	0	0.109300461	0.058939126	0.432400994
Riaz_Pt103_Pre	Riaz_Pt103	C2	SKCM	SKCM.TripleWt	1134.129708	2703.003	1631.9988	757.49999	2051.0049	7.28603016	8.023232213	7.122869081	0	1.325119781	NA	NA	0.070379619	0	0	0.030812269	0	0.046237943	0.044103695	0.289737059	0	0.079946219	0.02404991	0	0.037247186	0	0.090462082	0.013416031	0.031685828	0	0.152131618	0.05169368	0.000807	0.037290197	0.485112904	0	0	0.079946219	0.030812269	0.404128607	0	0	0.079946219	0.030812269	0.380078697
Riaz_Pt106_On	Riaz_Pt106	C4	SKCM	SKCM.BRAF	1852.99624	1296.9981	291.85733	937.4996679	3646.99654	6.478396296	8.790318796	3.545495946	1	0.249144422	NA	NA	0	0.01789776	0	0.017332859	0	0.063799052	0.092094119	0.336803964	0.002313475	0.035729522	0.042221743	0.011658344	0.036239137	0	0.027501351	0.059870351	0.016278415	0	0.126252799	0.075243734	0.01817484	0.020588535	0.398046923	0.011658344	0	0.038042996	0.017332859	0.534918878	0.011658344	0	0.038042996	0.017332859	0.492697135
Riaz_Pt106_Pre	Riaz_Pt106	C4	SKCM	SKCM.BRAF	2305.00019	1847.00032	338.499815	1542.500695	5802.99348	7.197991183	8.940674885	3.7287718	1	0.249144422	NA	NA	0	0.030225786	0	0.006126472	0	0.132519568	0.057168285	0.428336127	0	0.027171964	0.018384418	0.000611	0.019959502	0	0.026919353	0.026559839	0	0	0.161604294	0.037815106	0	0.026598706	0.329682587	0.000611	0	0.027171964	0.006126472	0.636408398	0.000611	0	0.027171964	0.006126472	0.61802398
Riaz_Pt108_On	Riaz_Pt108	C4	SKCM	SKCM.TripleWt	1401.5842	2506.0013	287.499985	1008.49985	2866.85637	6.559852148	7.041982989	9.512280172	0	2.499657768	NA	NA	0.010179393	0.002058383	0	0.004004652	0.010452846	0.103364011	0.031441236	0.42191102	0	0.04981845	0.023767915	0.031224664	0	0.013765887	0.067191537	0.025021714	0.154666716	0	0.051131577	0	0	0	0.324015206	0.031224664	0.010452846	0.04981845	0.004004652	0.580484181	0.031224664	0.010452846	0.04981845	0.004004652	0.556716266
Riaz_Pt11_On	Riaz_Pt11	C2	SKCM	SKCM.BRAF	1538.9961	2271.95228	496.499905	3118.97375	4198.7185	8.0760825	8.533398169	6.526519248	1	2.291581109	NA	NA	0.031622872	0	0.014353902	0.025972359	0	0	0.085345162	0.325712516	0	0.063768417	0.054324932	0.019165733	0.02145835	0.00768348	0.029607973	0.05711474	0.033761878	0	0.166585193	0.063522493	0	0	0.411356979	0.019165733	0	0.063768417	0.040326261	0.46538261	0.019165733	0	0.063768417	0.040326261	0.411057677
Riaz_Pt11_Pre	Riaz_Pt11	C2	SKCM	SKCM.BRAF	1735	2672.998012	397.50001	4508.32136	5210.00268	7.887987226	8.668516505	6.53861193	1	2.291581109	NA	NA	0.014553181	0	0	0.080966201	0	0.003598285	0.098669219	0.330850024	0	0.058415786	0.086653076	0.017766344	0.039396134	0	0.007915892	0.025207892	0	0	0.173920862	0.047311589	0	0.014775514	0.323081064	0.017766344	0	0.058415786	0.080966201	0.519770604	0.017766344	0	0.058415786	0.080966201	0.433117529
Riaz_Pt13_On	Riaz_Pt13	C2	SKCM	SKCM.BRAF	1659.9967	3391.217924	1027.499301	4635.498475	4618.9986	7.5979265	9.158930625	3.433483572	1	0.76659822	NA	NA	0.01820956	0	0	0.017270913	0.005444571	0	0.141309965	0.267635182	0	0.022240288	0.050060454	0.005250425	0.040372956	0	0.03498151	0.061778727	0	0	0.2348319	0.0883591	0	0.012254448	0.4907882	0.005250425	0.005444571	0.022240288	0.017270913	0.459005602	0.005250425	0.005444571	0.022240288	0.017270913	0.408945147
Riaz_Pt17_On	Riaz_Pt17	C4	SKCM	SKCM.TripleWt	1343.21	316.0007778	8.504395	307.50007	1446.00013	4.064124205	6.810450426	0.525492524	1	0.156057495	NA	NA	0.02335559	0.016114868	0.003929327	0.018035552	0	0.033207658	0.043607477	0.548727219	0	0.085995913	0.03833585	0	0.007895947	0.036306186	0.013282347	0	0.050372221	0	0.050685607	0.015475086	0	0.014673153	0.228161004	0	0	0.085995913	0.021964879	0.663878204	0	0	0.085995913	0.021964879	0.625542354
Riaz_Pt17_Pre	Riaz_Pt17	C4	SKCM	SKCM.TripleWt	1460.63	410.0003701	11.00000019	415.5000451	1846.99588	4.643608046	7.312033601	0	1	0.156057495	NA	NA	0.007631408	0.024082697	0.008268683	0.027076539	0	0	0.014794031	0.594948845	0	0.092149179	0.032381358	0	0.018190633	0.002998295	0.012148033	0.024645477	0.064468103	0	0.063554734	0.012661986	0	0	0.230381366	0	0	0.092149179	0.035345222	0.642124233	0	0	0.092149179	0.035345222	0.609742875
Riaz_Pt18_On	Riaz_Pt18	C2	SKCM	SKCM.BRAF	1497.80385	5610.19365	6515.001215	1371.4998	2556.801647	7.964599669	8.182105239	6.40157402	0	2.937713895	NA	NA	0.189741586	0.151119185	0	0	0	0.039116865	0.023702316	0.199628532	0	0.006761376	0.007483573	0	0	0.001848478	0.042050728	0.041646005	0	0	0.192706375	0.095349556	0.008845426	0	0.723307338	0	0	0.006761376	0	0.269931286	0	0	0.006761376	0	0.262447713
Riaz_Pt18_Pre	Riaz_Pt18	C2	SKCM	SKCM.BRAF	1893.1	3649	2181.995255	3672.4996	2965.99739	7.955063956	8.80433638	4.368488817	0	2.937713895	NA	NA	0.160578117	0.140381829	0	0.012616388	0.009663969	0.028263626	0.050996935	0.225567253	0	0.01766067	0.012487013	0.024181882	0	0	0.052364935	0.058362854	0	0.009512303	0.106560422	0.054274525	0.020664399	0.015862878	0.618562264	0.024181882	0.009663969	0.01766067	0.012616388	0.317314826	0.024181882	0.009663969	0.01766067	0.012616388	0.304827814
Riaz_Pt2_On	Riaz_Pt2	C4	SKCM	SKCM.NA	1726	2468.999741	253.999755	4835.99907	3539.9985	6.642537921	8.568016458	2.63328034	1	0.752908967	NA	NA	0.001313506	0.002834155	0	0	0.000148	0.154011756	0.114402738	0.312172968	0.000192	0.002201834	0.122796292	0	2.64E-06	0.009897547	0.006078161	0.088975168	0.004474674	0	0.133970015	0.037914585	0	0.008614369	0.294074822	0	0.000148	0.002393748	0	0.703383753	0	0.000148	0.002393748	0	0.580587462
Riaz_Pt2_Pre	Riaz_Pt2	C4	SKCM	SKCM.NA	1697.00081	3302.93426	477.325805	4857.49995	4786.00155	6.882501482	8.409720087	3.410286444	1	0.752908967	NA	NA	0	0.015693123	0	0.000857	0	0.087619942	0.079974405	0.313536066	0	0.03230102	0.182994762	0	0.01544871	0	0.003510125	0.0348106	0.060407407	0	0.119903262	0.024793657	0.005187134	0.022963104	0.30271712	0	0	0.03230102	0.000857	0.664125175	0	0	0.03230102	0.000857	0.481130413
Riaz_Pt23_On	Riaz_Pt23	C2	SKCM	SKCM.BRAF	1619	1789.99759	747.9159	1152.99868	4724.00402	7.013265183	8.336575725	8.345552034	1	0.142368241	NA	NA	0	0.023028426	0	0.002745186	0	0.033714626	0.097642404	0.229501985	0	0.004050733	0.016555711	0.006471099	0.046553032	0	0.09808377	0.086034266	0.002972382	0	0.253312472	0.07100586	0.026738689	0.00158936	0.609318257	0.006471099	0	0.004050733	0.002745186	0.377414726	0.006471099	0	0.004050733	0.002745186	0.360859015
Riaz_Pt23_Pre	Riaz_Pt23	C2	SKCM	SKCM.BRAF	1664.00034	2517.0001	635.500065	5919.501841	9738.0026	7.230115215	8.451854266	7.126864209	1	0.142368241	NA	NA	0	0.035608525	0	0.005160572	0	0.070854538	0.063290701	0.41256836	0.010451799	0.007199884	0.075607856	0.037688166	0.006385587	0.000752	0.042443142	0.017662605	0.068750157	0	0.127961788	0.017191133	0.000423	0	0.317178124	0.037688166	0	0.017651683	0.005160572	0.622321456	0.037688166	0	0.017651683	0.005160572	0.546713599
Riaz_Pt24_Pre	Riaz_Pt24	C4	SKCM	SKCM.TripleWt	1388.999509	6501.00095	642.999995	1236.00299	3855	7.378296675	7.488411759	3.997924472	0	0.407939767	NA	NA	0.046700643	0.003010042	0	0	0	0.285206976	0.017638524	0.438696069	0.042986854	0	0.020852502	0.015356006	0.017201674	0	0.018306052	0	0.022841406	0	0.047315848	0.01328669	0.009878372	0.000722	0.17926307	0.015356006	0	0.042986854	0	0.76239407	0.015356006	0	0.042986854	0	0.741541568
Riaz_Pt26_On	Riaz_Pt26	C4	SKCM	SKCM.RAS	1489.99635	461	60.9999745	8677.498849	2122.99933	5.299552671	7.86957002	3.938157712	0	2.606433949	NA	NA	0.095887646	0	0	0.029883401	0.003404939	0	0.075114355	0.386262881	0	0.056154151	0.034152531	0.010193526	0.037052231	0	0.053218957	0.025512073	0.037453116	0	0.100910093	0.0548001	0	0	0.404834216	0.010193526	0.003404939	0.056154151	0.029883401	0.495529767	0.010193526	0.003404939	0.056154151	0.029883401	0.461377236
Riaz_Pt26_Pre	Riaz_Pt26	C4	SKCM	SKCM.RAS	1428.00344	565.9991631	166.380485	7657.99825	2048.99826	5.789198861	8.119637298	2.050268261	0	2.606433949	NA	NA	0.022300811	0.043678665	0	0.024693688	0	0	0.108147871	0.387790867	0	0.036868365	0.028111593	0.006289343	0.020065046	0	0.063042308	0.049896285	0.027058829	0	0.094952086	0.07559311	0.011511134	0	0.408098274	0.006289343	0	0.036868365	0.024693688	0.52405033	0.006289343	0	0.036868365	0.024693688	0.495938738
Riaz_Pt27_On	Riaz_Pt27	C4	SKCM	SKCM.BRAF	1707.001	2173.99732	233.999765	1112	6222.91832	7.326327248	8.661679829	5.354805841	1	1.300479124	NA	NA	0.020539344	0	0	0.01130728	0.006193841	0.099862395	0.023699143	0.382608448	0.000744	0.015913313	0.124613557	0.0386059	0	0.028200983	0.087583854	0.028730471	0.00511478	0.011455547	0.109712775	0.005114826	0	0	0.296452578	0.0386059	0.006193841	0.016656857	0.01130728	0.630783543	0.0386059	0.006193841	0.016656857	0.01130728	0.506169986
Riaz_Pt27_Pre	Riaz_Pt27	C4	SKCM	SKCM.BRAF	1481	1604.9971	161.4997501	454.999995	2390.43205	6.652092825	9.216632355	6.79081089	1	1.300479124	NA	NA	0	0.054607044	0	0.002654745	0.042309613	0.048077574	0.003753548	0.267407851	0	0.02768	0.190930927	0.043417713	0	0.051198221	0.087326079	0.051820667	0.066061883	0.027541079	0.015152006	0	0.015775937	0.004285114	0.37376803	0.043417713	0.042309613	0.02768	0.002654745	0.5101699	0.043417713	0.042309613	0.02768	0.002654745	0.319238973
Riaz_Pt28_On	Riaz_Pt28	C2	SKCM	SKCM.TripleWt	1547.3468	2854.99688	1248.836575	1466.00054	4936.943008	8.447755447	9.023496938	2.554754197	1	2.026009582	NA	NA	0.006517163	0.009046999	0	0.017372257	0	0.029256156	0.077494339	0.215137782	0	0.009239385	0.02607377	0	0.026613784	0	0.077221355	0.072133944	0.001304804	0	0.277376964	0.075945437	0.07926586	0	0.62542631	0	0	0.009239385	0.017372257	0.347962048	0	0	0.009239385	0.017372257	0.321888277
Riaz_Pt28_Pre	Riaz_Pt28	C4	SKCM	SKCM.TripleWt	1527.996	995	326.7009	503.000125	2641	7.493132364	8.7377612	0.607706163	1	2.026009582	NA	NA	0.079394701	0	0	0.01612125	0.004318678	0.004251278	0.076980386	0.269680467	0.0114429	0	0.04387921	0	0.037555552	0	0.079023949	0.036392054	0.118132772	0	0.165561848	0.033854504	0.023410451	0	0.573325831	0	0.004318678	0.0114429	0.01612125	0.394791341	0	0.004318678	0.0114429	0.01612125	0.350912131
Riaz_Pt29_Pre	Riaz_Pt29	C4	SKCM	SKCM.RAS	2102.002	1799.9947	255.00015	2736.00112	3543.99686	8.313963221	8.764889484	7.125815702	1	0.747433265	NA	NA	0	0.059997985	0	0.040813981	0	0	0.034104551	0.360243792	0	0.059569068	0.027977732	0.016811686	0.017451071	0.000387	0.207666389	0.02091649	0.073291668	0	0.052804236	0.027964054	0	0	0.460479188	0.016811686	0	0.059569068	0.040813981	0.422326076	0.016811686	0	0.059569068	0.040813981	0.394348344
Riaz_Pt3_On	Riaz_Pt3	C2	SKCM	SKCM.RAS	1995.0034	1611.0044	486.4999556	2634.49645	4475.99954	7.986255949	8.613884534	8.387477094	0	3.1321013	NA	NA	0.000698	0.027094041	0.036640426	0	0.000318	0.051614369	0.045198491	0.238282774	0.136227243	0	0.068066625	0.073835855	0	0.022833492	0.079464064	0.037461557	0.089885073	0	0.064534157	0.027845888	0	0	0.349816531	0.073835855	0.000318	0.136227243	0.036640426	0.403162259	0.073835855	0.000318	0.136227243	0.036640426	0.335095633
Riaz_Pt3_Pre	Riaz_Pt3	C4	SKCM	SKCM.RAS	2358.9987	836	51.0000075	442.0001	4831.99863	6.488407008	8.818823406	1.210455259	0	3.1321013	NA	NA	0.023080653	0.000144	0.024072671	0.007661934	0	0.079654752	0.029302918	0.326241936	0.174781986	0	0.058499269	0.095054276	0	0.02849314	0.015116779	0	0.070487073	0.015430419	0.024610232	0.027368121	0	0	0.204730258	0.095054276	0	0.174781986	0.031734604	0.493698876	0.095054276	0	0.174781986	0.031734604	0.435199607
Riaz_Pt30_On	Riaz_Pt30	C3	SKCM	SKCM.TripleWt	1153.9	8515.998267	3142.500121	5303.998	4038.99687	7.979021585	7.382413645	5.306712475	0	2.882956878	NA	NA	0.009694579	0.00454154	0	0.012108298	0	0.08861319	0.048154642	0.397270824	0	0.015186169	0.000581	0.011346971	0.01957544	0	0.036924117	0.02624088	0	0	0.225503396	0.049041783	0.040171519	0.015045395	0.426738651	0.011346971	0	0.015186169	0.012108298	0.534619911	0.011346971	0	0.015186169	0.012108298	0.534038656
Riaz_Pt30_Pre	Riaz_Pt30	C4	SKCM	SKCM.TripleWt	1907.13724	640.9999573	106.000013	488.9594225	1511.22637	6.803815338	8.518253075	1.392270609	0	2.882956878	NA	NA	0.054643738	0.026646423	0	0.035596956	0	0	0.090608187	0.351339924	0	0.02932996	0.062853482	0	0.008681971	0.02739213	0.0531141	0.033069768	0.010620456	0	0.147415827	0.066100908	0	0.002586171	0.430271491	0	0	0.02932996	0.035596956	0.504801593	0	0	0.02932996	0.035596956	0.441948111
Riaz_Pt31_On	Riaz_Pt31	C4	SKCM	SKCM.TripleWt	1478.7097	3197.001	1059.49951	7501.373621	2691	7.92090754	8.695097668	7.167827329	0	2.631074607	NA	NA	0.00496543	0.020199009	0	0.013278139	0	0	0.10050559	0.350231554	0	0.025072702	0.074680276	0	0.017567252	0	0.08984767	0.037395888	0.068627226	0	0.133719908	0.02595911	0.017053042	0.020897206	0.436231739	0	0	0.025072702	0.013278139	0.52541742	0	0	0.025072702	0.013278139	0.450737143
Riaz_Pt31_Pre	Riaz_Pt31	C4	SKCM	SKCM.TripleWt	1289.997815	1452.9996	470.498075	4030.9985	2591.0044	7.473574884	8.377904497	8.21006292	0	2.631074607	NA	NA	0.039003627	0	0	0.013631378	0	0	0.106410716	0.318326407	0.001653282	0.005127749	0.109166849	0	0.010050886	0	0.110750661	0.033549222	0.069628837	0	0.11529605	0.035528184	0.010830621	0.02104553	0.445683619	0	0	0.006781031	0.013631378	0.533903973	0	0	0.006781031	0.013631378	0.424737123
Riaz_Pt32_On	Riaz_Pt32	C4	SKCM	SKCM.BRAF	162.0002	4840.99675	86.499985	3502.5025	357.99903	6.321827518	5.763849449	3.25064084	0	0.31211499	NA	NA	0.011486644	0.002735918	0.013817735	0	0	0	0.000267	0.042890743	0.14403978	0	0	0.690829838	0	0.028945334	0.00726676	0	0	0.016867449	0	0.026651348	0.014201572	0	0.108155025	0.690829838	0	0.14403978	0.013817735	0.043157623	0.690829838	0	0.14403978	0.013817735	0.043157623
Riaz_Pt34_On	Riaz_Pt34	C3	SKCM	SKCM.BRAF	1047.623	6962.9825	1395.0009	1179.999215	4041.99697	6.826505927	7.056890297	0.686842399	0	2.283367556	NA	NA	0.003355799	0.000936	0	0.001616684	0	0.140119546	0.023817178	0.503842627	0.00554275	0.011661249	0.024697097	0.004846129	0.004152795	0	0.020586473	0.005739457	0.013135145	0	0.202107798	0.021006442	0	0.012837193	0.283856739	0.004846129	0	0.017203999	0.001616684	0.692476449	0.004846129	0	0.017203999	0.001616684	0.667779352
Riaz_Pt34_Pre	Riaz_Pt34	C3	SKCM	SKCM.BRAF	1100.00483	6748	1221.0013	1441.99766	3370.48607	7.929264157	7.734563081	2.341917469	0	2.283367556	NA	NA	0.001455178	0.00424778	0	0.001943084	0	0.088541803	0.030344855	0.52003308	0.002440134	0.020435791	0.045084986	0.000332	0.008805186	0	0.018931492	0.02092166	0	0	0.18489486	0.019625324	0.010359795	0.021602689	0.290843964	0.000332	0	0.022875925	0.001943084	0.684004724	0.000332	0	0.022875925	0.001943084	0.638919738
Riaz_Pt36_On	Riaz_Pt36	C4	SKCM	SKCM.TripleWt	1902.43979	3812.93705	583.5004	1221.4988	5483.00213	8.60471245	8.103244521	7.824447778	0	2.9596167	NA	NA	0.018490133	0.01137419	0	0	0	0.402029848	0.037889216	0.239038383	0.013431717	0	0.040161375	0.007160053	0	0.017639739	0.041181531	0.010253601	0.005962246	0	0.114877605	0.015715162	0	0.0247952	0.260289407	0.007160053	0	0.013431717	0	0.719118823	0.007160053	0	0.013431717	0	0.678957447
Riaz_Pt36_Pre	Riaz_Pt36	C3	SKCM	SKCM.TripleWt	1153	4096.99901	60.08538	1032.50033	4783.00289	7.202899464	7.597584187	3.481024912	0	2.9596167	NA	NA	0.017130696	0	0	0.009252893	0	0	0.003129975	0.667235054	0	0.181172415	0.036962336	0.02461139	0	0.016062797	0.00258379	0.010756868	0.008864758	0.011702612	0.010534415	0	0	0	0.077635936	0.02461139	0	0.181172415	0.009252893	0.707327366	0.02461139	0	0.181172415	0.009252893	0.670365029
Riaz_Pt37_On	Riaz_Pt37	C4	SKCM	SKCM.RAS	2133	1573	303.5001	1075.998756	3879.004367	7.724853858	8.144104418	5.914613486	1	1.768651609	NA	NA	0.001746873	0.012122643	0.039778317	0.014365975	0	0.000824	0.029086747	0.284019463	0.079600604	0	0.03620222	0.186884121	0	0.009632757	0.003442569	0.110482572	0.065807546	0	0.044806057	0.071914161	0.009282879	0	0.329238057	0.186884121	0	0.079600604	0.054144293	0.350132925	0.186884121	0	0.079600604	0.054144293	0.313930705
Riaz_Pt37_Pre	Riaz_Pt37	C1	SKCM	SKCM.RAS	1583.2553	876.9997	195.5004191	1476.0002	4922	6.318749008	8.024915363	6.313693461	1	1.768651609	NA	NA	0.064523374	0	0	0.062302974	0	0.027013238	0.06186375	0.331865329	0	0.116096281	0.032096345	0.002395388	0.004506172	0.012690886	0.031540976	0.028650208	0.073255862	0	0.117304221	0.03206744	0	0.001827557	0.366366695	0.002395388	0	0.116096281	0.062302974	0.452838662	0.002395388	0	0.116096281	0.062302974	0.420742317
Riaz_Pt38_On	Riaz_Pt38	C4	SKCM	SKCM.TripleWt	2248.66	1045.00319	58.99995281	473.00009	6137.9968	6.028462564	7.646137947	0	1	0.457221082	NA	NA	0.086616317	0	0	0.013000778	0.001928411	0.011060488	0.051909467	0.500727345	0.000171	0.031540384	0.03301852	0.001295889	0.019578392	0.01002228	0.051326037	0.014600606	0.045167305	0	0.062833825	0.065203262	0	0	0.355348024	0.001295889	0.001928411	0.031711077	0.013000778	0.59671582	0.001295889	0.001928411	0.031711077	0.013000778	0.5636973
Riaz_Pt38_Pre	Riaz_Pt38	C4	SKCM	SKCM.TripleWt	1974.00034	642.00026	25.50001947	259.500185	4794.997798	5.219569309	7.616396143	0.493815155	1	0.457221082	NA	NA	0.08444732	0	0	0.009713687	0.000958	0.023766021	0.038204445	0.504472433	0	0.040815138	0.00926824	0.002420804	0	0.022712139	0.103470569	0.026306405	0.042400484	0	0.034901279	0.056142709	0	0	0.370380905	0.002420804	0.000958	0.040815138	0.009713687	0.575711139	0.002420804	0.000958	0.040815138	0.009713687	0.566442899
Riaz_Pt39_Pre	Riaz_Pt39	C4	SKCM	SKCM.NA	1673.9956	251	4.9999989	296	1678.99941	4.73676111	8.323620721	1.026689169	1	0.454483231	NA	NA	0.018262316	0.022646991	0.01246265	0.026742436	0.014077541	0.016733766	0.016006846	0.508170093	0	0.042731792	0.099311692	0.006101381	0	0.059131152	0.010919186	0.01773209	0.083912548	0	0.016332952	0.023806662	0	0.004917905	0.257661804	0.006101381	0.014077541	0.042731792	0.039205085	0.640222397	0.006101381	0.014077541	0.042731792	0.039205085	0.540910705
Riaz_Pt4_On	Riaz_Pt4	C3	SKCM	SKCM.RAS	1508.0003	4453.9803	2554.054201	3299.002325	4224.9979	8.250246681	8.426205171	4.356832323	1	1.733059548	NA	NA	0	0.028189555	0	0.01507949	0	0	0.088478542	0.213751304	0.00617226	0.007634023	0.052082729	0	0.007774687	0	0.076781306	0.062583298	0	0	0.324753203	0.088451564	0	0.028268039	0.616801652	0	0	0.013806283	0.01507949	0.354312575	0	0	0.013806283	0.01507949	0.302229846
Riaz_Pt4_Pre	Riaz_Pt4	C4	SKCM	SKCM.RAS	1788.83619	1373.003	241.49245	590.99965	3478.0022	7.26782827	8.24099074	6.133067136	1	1.733059548	NA	NA	0.024739612	0.02738458	0	0.007689421	0	0.071447766	0.024389571	0.225115136	0.016480969	0	0.166946875	0.07648551	0.002208173	0.026764188	0.024966601	0.025370256	0.036482976	0	0.150006588	0.034760392	0.008110089	0.050651295	0.411444752	0.07648551	0	0.016480969	0.007689421	0.487899348	0.07648551	0	0.016480969	0.007689421	0.320952473
Riaz_Pt44_On	Riaz_Pt44	C3	SKCM	SKCM.BRAF	1021	2122.00004	592.499595	1607.00155	5498.99538	7.812632255	7.690021454	4.082887321	0	2.99247091	NA	NA	0.028390345	0.001836638	0.000736	0.001464477	0	0	0.038480011	0.409954758	0	0.107595939	0.022743145	0.005793697	0.002483076	0	0.003934081	0.018439765	0.027257065	0	0.239911814	0.037204573	0.048207274	0.005567766	0.413232398	0.005793697	0	0.107595939	0.002200052	0.471177914	0.005793697	0	0.107595939	0.002200052	0.448434769
Riaz_Pt44_Pre	Riaz_Pt44	C4	SKCM	SKCM.BRAF	1968	2822.9939	529.99982	4036.99769	5474.00379	8.209504807	9.083066431	0	0	2.99247091	NA	NA	0.012246817	0.000525	0	0.063010695	0.000323	0.022577925	0.122427206	0.310639045	0	0.005474887	0.052019034	0.017479725	0.00888015	0	0.025977044	0.087670482	0	0	0.212876028	0.046069276	0	0.011803478	0.406048022	0.017479725	0.000323	0.005474887	0.063010695	0.507663211	0.017479725	0.000323	0.005474887	0.063010695	0.455644177
Riaz_Pt46_On	Riaz_Pt46	C4	SKCM	SKCM.BRAF	1102.54583	5238.0048	460.80455	1597.4986	4288.00428	6.786596581	7.667499417	4.850402914	1	0.621492129	NA	NA	0.018421047	0	0	0.001682922	0	0.330092066	0.03793195	0.390906974	0	0.075391253	0.006932525	0.000187	0.002455487	0	0.003715676	0.002925885	0.047870127	0	0.043057024	0.00990564	0.028524894	0	0.15687578	0.000187	0	0.075391253	0.001682922	0.765863515	0.000187	0	0.075391253	0.001682922	0.75893099
Riaz_Pt46_Pre	Riaz_Pt46	C3	SKCM	SKCM.BRAF	1252.205	5956.84898	797.500035	1758.002065	4385.99797	7.019232075	7.455948764	4.908381461	1	0.621492129	NA	NA	0.004868414	0.00528258	0	0.004186203	0	0.153392779	0.026507343	0.53483987	0	0.100833911	0.01898035	0.0038671	0.010272316	0	0.005216314	0.012610253	0.046195092	0	0.046043072	0.008116276	0.018788127	0	0.157392445	0.0038671	0	0.100833911	0.004186203	0.733720342	0.0038671	0	0.100833911	0.004186203	0.714739991
Riaz_Pt47_On	Riaz_Pt47	C4	SKCM	SKCM.BRAF	1661.00112	1659	157.999821	1841.502475	5880.00403	7.469117132	8.534686429	9.177279011	1	1.965776866	NA	NA	0.020821916	0	0.000566	0.026674895	0.001199083	0.050242238	0.056272324	0.345455801	0	0.037683671	0.221592007	0	0.017569922	0.002548337	0.011783167	0.022294609	0.071222974	0	0.077317658	0.026877588	0	0.009877487	0.260313658	0	0.001199083	0.037683671	0.027241218	0.67356237	0	0.001199083	0.037683671	0.027241218	0.451970363
Riaz_Pt47_Pre	Riaz_Pt47	C4	SKCM	SKCM.BRAF	1547.998993	2324.997	268.500145	1984.5	8029.00048	7.22480265	8.583364161	9.042593402	1	1.965776866	NA	NA	0.044177759	0	0.003066171	0.035805176	0	0.062302919	0.034494496	0.337692394	0	0.050666858	0.213262789	0	0.012412202	0	0.019951294	0.024357436	0.101333193	0	0.046355518	0.003998582	0	0.010123212	0.262709197	0	0	0.050666858	0.038871347	0.647752597	0	0	0.050666858	0.038871347	0.434489808
Riaz_Pt48_On	Riaz_Pt48	C3	SKCM	SKCM.TripleWt	823.5645	968.00053	188.5000925	811.99978	1955.00106	5.299023968	6.056351092	9.234153766	0	2.863791923	NA	NA	0.045742444	0.007179591	0	0	0	0	0.026627603	0.489134723	0	0.060001806	0.08423734	0.034334521	0	0.030229539	0.062061121	0	0.058995377	0	0.077198437	0.016112129	0	0.008145367	0.305664006	0.034334521	0	0.060001806	0	0.599999666	0.034334521	0	0.060001806	0	0.515762326
Riaz_Pt48_Pre	Riaz_Pt48	C3	SKCM	SKCM.TripleWt	749.00008	1153.999085	282.00028	897.483075	2319.00326	6.634854702	7.930373966	9.231954547	0	2.863791923	NA	NA	0	0.035517484	0	0.005859366	0	0.020074364	0.056007969	0.453673553	0	0.050054523	0.023928097	0.029469141	0.004502568	0	0.094995112	0.017573451	0.045585832	0	0.103138865	0.031364412	0.022549126	0.005706137	0.360932987	0.029469141	0	0.050054523	0.005859366	0.553683982	0.029469141	0	0.050054523	0.005859366	0.529755886
Riaz_Pt49_On	Riaz_Pt49	C3	SKCM	SKCM.RAS	1429.0024	6126.99532	3155.497895	3262.500865	3967.00265	8.310665998	8.132154756	5.749357513	0	2.2642026	NA	NA	0.000144	0.019083845	0	0.016777877	0	0	0.088031748	0.222902997	0	0.024196637	0.024508917	0.013265312	0.066145674	0	0.047928339	0.07995917	0	0	0.309837745	0.051743516	0	0.035474207	0.610316511	0.013265312	0	0.024196637	0.016777877	0.335443662	0.013265312	0	0.024196637	0.016777877	0.310934745
Riaz_Pt49_Pre	Riaz_Pt49	C3	SKCM	SKCM.RAS	1537.75679	3366.77118	1562.341126	2347.919915	4334.40967	7.484349106	8.106354986	7.578490021	0	2.2642026	NA	NA	0.038081101	0.013610359	0	0.006679083	0	0	0.081446019	0.344013467	0	0.032595716	0.021681765	0.012680208	0.031045182	0	0.081519413	0.012462738	0.063174921	0	0.19786906	0.04435966	0.003228519	0.01555279	0.500903742	0.012680208	0	0.032595716	0.006679083	0.447141251	0.012680208	0	0.032595716	0.006679083	0.425459486
Riaz_Pt5_On	Riaz_Pt5	C4	SKCM	SKCM.TripleWt	1663.99974	2312.64852	290.499675	2046.002375	1675.00489	6.777112702	8.649459606	0.955944239	1	0.607802875	NA	NA	0.007297376	0	0	0.007581152	0.002457403	0.134637716	0.067036814	0.277972202	0.034682384	0	0.0636172	0.13886696	0.047746836	0	0.015459159	0.011266383	0.000648	0	0.138077985	0.036680522	0	0.015971423	0.27314817	0.13886696	0.002457403	0.034682384	0.007581152	0.543263932	0.13886696	0.002457403	0.034682384	0.007581152	0.479646732
Riaz_Pt5_Pre	Riaz_Pt5	C4	SKCM	SKCM.TripleWt	1449.1831	2580.00042	721.0856	1627.00163	1605	7.082217466	8.442928081	4.365118286	1	0.607802875	NA	NA	0.01284763	0.015292577	0	0.0264917	0.001288562	0.010046824	0.043707081	0.300919704	0.017640943	0	0.107397407	0.083422758	0.049471958	0	0.042220632	0.023625975	0.001497003	0	0.17930739	0.055772304	0.011580718	0.017468834	0.40908502	0.083422758	0.001288562	0.017640943	0.0264917	0.462071016	0.083422758	0.001288562	0.017640943	0.0264917	0.354673609
Riaz_Pt52_On	Riaz_Pt52	C4	SKCM	SKCM.TripleWt	1406	1279.00091	163.5002442	2648.00061	4215.997879	7.074484814	8.405154269	8.079123257	1	1.303216975	NA	NA	0.020778705	0	0	0.00711052	0	0.091933371	0.065839567	0.359015202	0	0.066707251	0.053145963	0.004215654	0.031197634	0	0.06345684	0.01142388	0.082004378	0	0.095722319	0.03632923	0	0.011119485	0.352032472	0.004215654	0	0.066707251	0.00711052	0.569934103	0.004215654	0	0.066707251	0.00711052	0.51678814
Riaz_Pt52_Pre	Riaz_Pt52	C4	SKCM	SKCM.TripleWt	1212.00134	1086.00445	155.50025	2526.760714	3306	6.908139608	8.14494688	9.399950635	1	1.303216975	NA	NA	0	0.016158722	0	0.008709979	0	0.059688981	0.065853644	0.415218529	0	0.056821231	0.088928527	0	0	0.010410616	0.048659456	0.024284483	0.114203419	0.020652452	0.047341098	0	0.023068861	0	0.304779109	0	0	0.056821231	0.008709979	0.629689681	0	0	0.056821231	0.008709979	0.540761154
Riaz_Pt58_On	Riaz_Pt58	C3	SKCM	SKCM.NF1	1468.99804	2242.708289	777.8823425	1588.996575	3180.99603	7.58569036	8.812313054	4.150988117	1	1.366187543	NA	NA	0.0244649	0	0	0.00439539	0	0.014385784	0.137704823	0.263110947	0	0.016302088	0.042455128	0.00540276	0.049332553	0	0.017255787	0.046198158	0	0	0.251965059	0.085293259	0	0.041733365	0.51624308	0.00540276	0	0.016302088	0.00439539	0.457656683	0.00540276	0	0.016302088	0.00439539	0.415201555
Riaz_Pt59_Pre	Riaz_Pt59	C2	SKCM	SKCM.RAS	1708	3362.00538	572.00022	5651.5	4183.00206	8.787681736	8.271346259	5.876025658	1	1.938398356	NA	NA	0.046262977	0	0	0.027582979	0.000978	0.062522985	0.059777686	0.367009997	0	0.032423121	0.01883763	0.019637307	0.006946114	0.025905168	0.037632275	0.088798599	0	0	0.183358395	0.022326665	0	0	0.411230194	0.019637307	0.000978	0.032423121	0.027582979	0.508148298	0.019637307	0.000978	0.032423121	0.027582979	0.489310668
Riaz_Pt62_On	Riaz_Pt62	C4	SKCM	SKCM.NA	1664.00457	567.00015	51.49997079	614.499985	2033.00087	6.847800771	8.055266007	7.332973952	1	1.292265572	NA	NA	0.012085846	0.017697342	0	0.039665276	0	0.128423465	0.062807554	0.401304821	0	0.066555723	0.063148618	0	0.028927078	0	0.013923509	0.019778229	0.037679756	0	0.075190584	0.030028347	0	0.002783851	0.238094542	0	0	0.066555723	0.039665276	0.655684459	0	0	0.066555723	0.039665276	0.59253584
Riaz_Pt62_Pre	Riaz_Pt62	C4	SKCM	SKCM.NA	1752.50388	467.000079	85.5	337.50015	1230	6.622913763	8.402506468	0	1	1.292265572	NA	NA	0.069727348	0	0	0.06733417	0.019991305	0.053727407	0.031816853	0.346837208	0	0.019246699	0.076424295	0	0.03185203	0	0.037201306	0.012343304	0.014883033	0	0.161412321	0.053553213	0	0.003649507	0.384622061	0	0.019991305	0.019246699	0.06733417	0.508805764	0	0.019991305	0.019246699	0.06733417	0.432381469
Riaz_Pt65_On	Riaz_Pt65	C4	SKCM	SKCM.TripleWt	1711.999	1791.616	516	2444.44952	5569.00086	8.047084386	8.270252771	3.464013455	0	1.894592745	NA	NA	0.018274758	0.011445518	0	0.040745392	0	0.039506318	0.172157197	0.228753604	0.004726863	0.003992712	0.011476069	0.014258429	0	0	0.117692591	0.086030825	0.003014421	0	0.160208823	0.060350146	0.02649782	0.000869	0.484383415	0.014258429	0	0.008719575	0.040745392	0.451893188	0.014258429	0	0.008719575	0.040745392	0.440417119
Riaz_Pt65_Pre	Riaz_Pt65	C2	SKCM	SKCM.TripleWt	2066.03513	1954.99506	783.7043508	3246.501258	6205.999889	7.548761733	8.39928473	3.728999639	0	1.894592745	NA	NA	0.032163904	0.021414287	0	0.010790853	0	0.132667526	0.130130424	0.246168514	0	0.028001169	0	0.000755	0.008217714	0	0.09589625	0.019958153	0.069973375	0	0.107147299	0.068087969	0.015299918	0.013327708	0.451486576	0.000755	0	0.028001169	0.010790853	0.508966463	0.000755	0	0.028001169	0.010790853	0.508966463
Riaz_Pt66_Pre	Riaz_Pt66	C4	SKCM	SKCM.BRAF	1661.39738	635.00044	62.000005	4410.01548	2959	6.069798887	8.943142034	0	1	1.483915127	NA	NA	0.148985375	0	0	0.02226627	0	0.056515517	0.037234847	0.447089484	0.021610626	0.000157	0.051770562	0.011639036	0.007833102	0.018524983	0.050383481	0	0	0	0.102590994	0.015327995	0	0.008070399	0.35171633	0.011639036	0	0.021767955	0.02226627	0.592610409	0.011639036	0	0.021767955	0.02226627	0.540839848
Riaz_Pt67_On	Riaz_Pt67	C2	SKCM	SKCM.TripleWt	700.20507	309.68902	211.33086	864.49985	1222.99727	6.211490317	7.366015726	9.555359747	0	2.825462012	NA	NA	0	0.096705004	0	0.013813209	0.00379306	0.002893518	0.034264812	0.145169086	0	0.136747449	0.010230342	0	0.019154744	0	0.132749423	0.03037251	0.16320449	0	0.149579545	0.020112759	0.027452052	0.013757997	0.653088524	0	0.00379306	0.136747449	0.013813209	0.192557758	0	0.00379306	0.136747449	0.013813209	0.182327416
Riaz_Pt67_Pre	Riaz_Pt67	C4	SKCM	SKCM.TripleWt	783.99975	392	293.9996815	1095.501505	1637	6.144954705	7.619403002	9.570315471	0	2.825462012	NA	NA	0	0.096951714	0.006076595	0.004052204	0	0.005368479	0.030954826	0.225921985	0.011648666	0.128324615	0.00416059	0.00064	0	0.011783401	0.137029992	0.01819747	0.097121954	0	0.159520708	0.041549728	0.006896908	0.013800236	0.582852113	0.00064	0	0.139973281	0.010128799	0.26640588	0.00064	0	0.139973281	0.010128799	0.262245291
Riaz_Pt68_On	Riaz_Pt68	C4	SKCM	SKCM.TripleWt	1966.9987	471.4762	128.49996	358.49971	2308	5.596925862	8.280856707	7.101167787	0	2.305270363	NA	NA	0	0.126718334	0	0.00574243	0	0.037172029	0.049425246	0.357975645	0	0.03563533	0.009812482	0.000911	0	0.019056137	0.121253222	0.009896825	0.127011515	0	0.065284256	0.026674839	0	0.007430828	0.503325957	0.000911	0	0.03563533	0.00574243	0.454385402	0.000911	0	0.03563533	0.00574243	0.44457292
Riaz_Pt72_Pre	Riaz_Pt72	C4	SKCM	SKCM.BRAF	1404.65995	628.0005	24.50000002	637.00025	2881.00252	5.517288847	8.272358855	2.540656063	1	2.108145106	NA	NA	0.083555166	0	0	0.013496053	0	0.136541854	0.045363231	0.424971778	0.012871753	0.010779908	0.046132642	0.052157145	0	0.053853467	0.012659943	0.035222986	0.019060184	0	0.025300658	0.018311977	0.009721254	0	0.257685636	0.052157145	0	0.02365166	0.013496053	0.653009506	0.052157145	0	0.02365166	0.013496053	0.606876864
Riaz_Pt76_Pre	Riaz_Pt76	C4	SKCM	SKCM.RAS	1959.00017	476.9996	30.49996634	1470.497806	5391.0312	4.750945497	7.545866289	2.029157712	1	0.027378508	NA	NA	0.014940421	0.005706349	0.030093851	0.013491614	0.02697793	0.071886851	0.013019123	0.259509941	0.055030949	0	0.027198282	0.271875007	0	0.042476542	0	0.075309144	0.016109693	0.015121252	0.035361509	0.010896887	0.014994655	0	0.230916452	0.271875007	0.02697793	0.055030949	0.043585465	0.371614197	0.271875007	0.02697793	0.055030949	0.043585465	0.344415916
Riaz_Pt77_On	Riaz_Pt77	C3	SKCM	SKCM.BRAF	1531.99583	5498.0044	6521.0028	2058.999865	4100.99708	8.005433524	8.189477618	5.805556057	1	1.289527721	NA	NA	0.165307131	0.157183175	0.028575585	0	0	0.003143004	0.023460298	0.156618167	0	0.086698865	0.022048615	0	0.001205693	0	0.027249017	0.045082124	0.005946688	0.030592269	0.17256084	0.050867974	0.003516554	0.019944002	0.679455466	0	0	0.086698865	0.028575585	0.205270085	0	0	0.086698865	0.028575585	0.18322147
Riaz_Pt77_Pre	Riaz_Pt77	C3	SKCM	SKCM.BRAF	1667.0003	3582.99627	2976.502535	2014.49965	3959.002158	7.87136285	8.212607443	8.60535418	1	1.289527721	NA	NA	0.232840558	0.044642643	0	0.016164785	0	0.036410152	0.072390257	0.139413922	0	0.073729252	0.012583047	0.004145593	0.036353191	0	0.041560796	0.077913788	0	0.019185387	0.110249787	0.07239506	0.006144123	0.00387766	0.645162992	0.004145593	0	0.073729252	0.016164785	0.260797378	0.004145593	0	0.073729252	0.016164785	0.248214331
Riaz_Pt78_On	Riaz_Pt78	C3	SKCM	SKCM.NA	1245	2074.000299	193.026775	1634.50015	3248.9971	7.173178313	7.172716528	7.243807556	1	0.213552361	NA	NA	0.010249143	0	0.00276585	0	0	0	0.030113194	0.369555039	0	0.102250078	0.171647123	0.158063798	0.002705238	0.003369073	0.012386488	0.016027708	0.014192818	0.007858593	0.059297822	0.015867367	0.023650668	0	0.165604918	0.158063798	0	0.102250078	0.00276585	0.571315357	0.158063798	0	0.102250078	0.00276585	0.399668233
Riaz_Pt78_Pre	Riaz_Pt78	C4	SKCM	SKCM.NA	1601.00258	206	16.500015	267.00005	2054.99881	4.005213474	8.095654865	0.673451376	1	0.213552361	NA	NA	0.053024698	0.014884184	0.007730203	0.021666615	0.023277138	0.011602295	0.023246577	0.445338042	0.012886287	0.047255641	0.037326391	0	0.022505143	0.028348114	0.068520469	0	0.071664709	0.022550636	0.036301253	0.051871604	0	0	0.369670811	0	0.023277138	0.060141928	0.029396818	0.517513306	0	0.023277138	0.060141928	0.029396818	0.480186914
Riaz_Pt79_On	Riaz_Pt79	C3	SKCM	SKCM.NF1	1726	1162	276.0000951	961.966295	4271.99524	6.966704621	8.525653654	7.020798778	1	0.596851472	NA	NA	0.015669896	0	0	0.008967218	0	0	0.074866411	0.389908778	0	0.027347238	0.057332163	0.001425975	0.035878421	0	0.032773024	0	0.073102445	0	0.195785508	0.071219425	0	0.015723497	0.440152216	0.001425975	0	0.027347238	0.008967218	0.522107352	0.001425975	0	0.027347238	0.008967218	0.464775189
Riaz_Pt79_Pre	Riaz_Pt79	C3	SKCM	SKCM.NF1	1700.72249	872.0003	167.499555	982.49988	2804.99998	6.69093578	8.556228595	8.695597638	1	0.596851472	NA	NA	0.069182587	0	0	0.023835296	0.005982217	0	0.100512421	0.307052494	0	0.023939933	0.052257133	0.00593108	0.046039533	0	0.04452186	0.01299894	0	0	0.194398521	0.103559406	0	0.009788579	0.480489424	0.00593108	0.005982217	0.023939933	0.023835296	0.459822049	0.00593108	0.005982217	0.023939933	0.023835296	0.407564915
Riaz_Pt8_On	Riaz_Pt8	C2	SKCM	SKCM.TripleWt	1910	1758.0005	254.9998502	3289.00125	3787.99537	6.581915543	8.081792868	2.95667981	1	0.709103354	NA	NA	0.032203626	0	0	0.01454284	0.004929033	0.045470662	0.084316605	0.447158028	0.035646617	0	0.048669965	0.00038	0.023511109	0.002813013	0.011325049	0.011405643	0.01439972	0	0.17055232	0.043577071	0	0.009098679	0.318886229	0.00038	0.004929033	0.035646617	0.01454284	0.625615259	0.00038	0.004929033	0.035646617	0.01454284	0.576945294
Riaz_Pt8_Pre	Riaz_Pt8	C4	SKCM	SKCM.TripleWt	1708	1777.999	423.5005537	2554.4997	6411.00026	7.296955165	8.461988742	3.41375006	1	0.709103354	NA	NA	0.037087915	0.013595686	0	0.004071449	0	0.028694711	0.06072698	0.43225896	0	0.050978157	0.023363861	0.016274469	0.002884699	0.015355455	0.104714248	0.013020024	0.004646448	0	0.155941629	0.02920711	0.000462	0.006716588	0.383631413	0.016274469	0	0.050978157	0.004071449	0.545044512	0.016274469	0	0.050978157	0.004071449	0.521680651
Riaz_Pt82_On	Riaz_Pt82	C3	SKCM	SKCM.TripleWt	1387.00003	1791.99613	678.94993	1438.476205	2610.6319	7.75001774	8.404893825	9.42874504	1	1.174537988	NA	NA	0.00478037	0.023205456	0	0.01982577	0	0.012493516	0.087071282	0.282565842	0	0.047319499	0.073611769	0	0.055948608	0	0.053267608	0.015004033	0.036345128	0	0.189642343	0.058252622	0	0.040666154	0.477112321	0	0	0.047319499	0.01982577	0.45574241	0	0	0.047319499	0.01982577	0.38213064
Riaz_Pt82_Pre	Riaz_Pt82	C4	SKCM	SKCM.TripleWt	1450.99991	1585.0008	433.5004191	821.999945	1982.0031	7.403370534	8.788589441	6.948360164	1	1.174537988	NA	NA	0	0.03348705	0	0.05556785	0.009818942	0.078560387	0.038145665	0.402450972	0	0.035043926	0.030711999	0.003725378	0.01635641	0	0.035986623	0.008901946	0.04947327	0	0.126094634	0.055636165	0.001408242	0.018630543	0.345974882	0.003725378	0.009818942	0.035043926	0.05556785	0.549869023	0.003725378	0.009818942	0.035043926	0.05556785	0.519157024
Riaz_Pt84_On	Riaz_Pt84	C4	SKCM	SKCM.TripleWt	1608.00453	354.00018	7.999995	257.00026	2381.001724	5.384486892	8.007212023	1.011015177	1	0.413415469	NA	NA	0.018773424	0.014320374	0	0.018828002	0.002379907	0.024525468	0.013354907	0.655213193	0	0.077283418	0.018801401	0	0	0.035693484	0.009222377	0.002364684	0.04553351	0.008438163	0.032072203	0.023195487	0	0	0.189613705	0	0.002379907	0.077283418	0.018828002	0.711894969	0	0.002379907	0.077283418	0.018828002	0.693093568
Riaz_Pt84_Pre	Riaz_Pt84	C4	SKCM	SKCM.TripleWt	1368.0001	276.0003	7	208.99987	2257	4.348917738	7.857665638	2.553984903	1	0.413415469	NA	NA	0.024890044	0.016870079	0.001762978	0.028167645	0	0.025669904	0.018457402	0.578510051	0	0.112745391	0.011503208	0	0.007003219	0.023537219	0.013983986	0	0.047704475	0.041042187	0	0.034925468	0.013226745	0	0.223183422	0	0	0.112745391	0.029930623	0.634140564	0	0	0.112745391	0.029930623	0.622637356
Riaz_Pt85_On	Riaz_Pt85	C4	SKCM	SKCM.RAS	1606.0008	708.0004	92.000015	3262.50455	3659	5.48995997	8.002312687	1.270955739	0	2.475017111	NA	NA	0.107128521	0	0	0.018077304	1.45E-05	0	0.032659051	0.444354099	0	0.092119558	0.052741432	0.007829468	0	0.039366575	0.041851436	0.028514446	0.030346666	0.000374	0.072606611	0.030312208	0	0.001704233	0.352204622	0.007829468	1.45E-05	0.092119558	0.018077304	0.529754582	0.007829468	1.45E-05	0.092119558	0.018077304	0.47701315
Riaz_Pt85_Pre	Riaz_Pt85	C4	SKCM	SKCM.RAS	1978.99813	546.82098	6.472965	3295.503125	3227.0028	4.461261839	7.640390494	2.464002266	0	2.475017111	NA	NA	0.04446265	0	0.011217287	0.015391502	0.002569782	0.043292307	0.013505125	0.590372327	0	0.045453548	0.06239607	0.017799433	0	0.032977432	0.009311404	0	0.050687105	0.018151794	0	0.042098473	0.000314	0	0.198002619	0.017799433	0.002569782	0.045453548	0.026608789	0.709565828	0.017799433	0.002569782	0.045453548	0.026608789	0.647169758
Riaz_Pt87_On	Riaz_Pt87	C2	SKCM	SKCM.RAS	1544.00309	8031.9996	3333.99815	7636.49854	5365.9974	8.033104935	8.304001361	6.189186737	0	2.666666666	NA	NA	0.026291411	0.015504436	0	0	0.003847332	0	0.114635324	0.278859569	0	0.00382237	0.081230332	0.004890988	0.002041625	0	0.039469944	0.067313103	0	0	0.241024358	0.065097443	0.022894927	0.033076839	0.512714085	0.004890988	0.003847332	0.00382237	0	0.474725225	0.004890988	0.003847332	0.00382237	0	0.393494893
Riaz_Pt89_On	Riaz_Pt89	C3	SKCM	SKCM.TripleWt	1862.34475	1589.74306	261.99985	1511.50185	7778.00413	7.716532123	8.767778857	7.69076861	1	2.310746065	NA	NA	0.008726352	0.005489529	0	0.027108241	0	0.125146929	0.156412788	0.294890849	0	0.110567917	0.017032258	0.004984153	0.006311756	0.001101614	0.017447204	0.039685301	0.029665648	0	0.107802837	0.036550223	0.006029114	0.005047285	0.263856865	0.004984153	0	0.110567917	0.027108241	0.593482824	0.004984153	0	0.110567917	0.027108241	0.576450566
Riaz_Pt89_Pre	Riaz_Pt89	C3	SKCM	SKCM.TripleWt	2081.6708	1239.00019	167.000159	1248.501338	8867.00468	7.770942709	8.601269428	8.558180322	1	2.310746065	NA	NA	0.052051846	0	0	0.009243506	0	0.143401863	0.039000392	0.268213957	0	0.272323374	0	0.020448392	0	0	0.038833368	0.007017658	0.019824207	0	0.050120741	0.057371249	0.020683576	0.001465872	0.247368517	0.020448392	0	0.272323374	0.009243506	0.450616212	0.020448392	0	0.272323374	0.009243506	0.450616212
Riaz_Pt9_On	Riaz_Pt9	C4	SKCM	SKCM.BRAF	2008.00104	1325.99382	76.999985	385.000015	7059.00299	6.7480811	9.206862416	5.885986956	1	0.251882272	NA	NA	0.04270126	0	0	0.015190122	0	0.136525629	0.008437745	0.493237123	0.023323566	0	0.012947884	0.009538604	0	0.048631571	0.026972201	0	0.115053003	0.067441292	0	0	0	0	0.300799327	0.009538604	0	0.023323566	0.015190122	0.651148382	0.009538604	0	0.023323566	0.015190122	0.638200498
Riaz_Pt9_Pre	Riaz_Pt9	C4	SKCM	SKCM.BRAF	1711.0002	1352.999828	93.499985	624.4999	6091.99952	6.917776875	9.042034205	4.424009285	1	0.251882272	NA	NA	0.049100256	0	0	0.011865257	0	0.145147818	0.012278288	0.547752463	0.028915981	0	0.000787	0	0	0.033352215	0.035832586	0	0.042945159	0.071412323	0.008073166	0.012537355	0	0	0.253253061	0	0	0.028915981	0.011865257	0.705965701	0	0	0.028915981	0.011865257	0.70517857
Riaz_Pt90_Pre	Riaz_Pt90	C2	SKCM	SKCM.TripleWt	2101.56032	2663.0811	825.49947	3096.49952	3878	7.302935562	8.028987611	4.937674291	1	0.476386037	NA	NA	0.008022806	0.010935294	0.007294468	0.005896842	0	0.003364325	0.025922303	0.227841354	0.153129568	0	0.075951127	0.135423758	0.005741885	0.002637985	0.032865287	0.070635936	0.050642453	0	0.155182499	0.028512109	0	0	0.365176254	0.135423758	0	0.153129568	0.01319131	0.33307911	0.135423758	0	0.153129568	0.01319131	0.257127983
Riaz_Pt92_On	Riaz_Pt92	C2	SKCM	SKCM.RAS	1657.52462	4575.0026	2165.370562	8672.5013	2761.56402	8.590318905	8.779298468	4.067653095	1	0.911704312	NA	NA	0	0.030126832	0	0.002731254	0	0	0.1215327	0.133629852	0	0.003992818	0.019548926	0.005268989	0.041329228	0	0.009998808	0.130537713	0	0	0.391861532	0.097902983	0.003686149	0.007852216	0.713295461	0.005268989	0	0.003992818	0.002731254	0.274711478	0.005268989	0	0.003992818	0.002731254	0.255162551
Riaz_Pt92_Pre	Riaz_Pt92	C2	SKCM	SKCM.RAS	1618.7726	2202.003101	767.000655	5819.50121	3099.99509	7.771597207	9.027836169	2.429298676	1	0.911704312	NA	NA	0	0.030866519	0	0.012689719	0	0	0.095197135	0.276012351	0	0.023273869	0.086032295	0	0.042498052	0	0.041842022	0.054145804	0.007858035	0	0.2511613	0.078422898	0	0	0.50679463	0	0	0.023273869	0.012689719	0.457241781	0	0	0.023273869	0.012689719	0.371209486
Riaz_Pt93_On	Riaz_Pt93	C4	SKCM	SKCM.TripleWt	2414.0034	834.99953	46.999965	1035.00028	3300.99547	6.355743894	8.18388191	8.503923015	0	2.324435319	NA	NA	0.050511215	0	0	0.017989893	0.002201217	0.103407279	0.061814079	0.515776449	0	0.033634591	0.010739747	0.005985823	0.006048843	0	0.028829908	0	0	0	0.035719967	0.085035637	0.042305352	0	0.248450922	0.005985823	0.002201217	0.033634591	0.017989893	0.691737554	0.005985823	0.002201217	0.033634591	0.017989893	0.680997807
Riaz_Pt94_On	Riaz_Pt94	C4	SKCM	SKCM.BRAF	1221.0002	1610.96306	217.783887	652.500275	3395.99584	8.0069618	8.447585235	9.62220785	0	2.685831621	NA	NA	0.029035499	0	0	0.01035725	0	0.061065651	0.071125602	0.486444285	0	0.011408536	0.02668299	0.019897916	0.023857455	0.009759087	0.013144891	0.025309377	0.015759514	0	0.130092186	0.055330961	0	0.010728802	0.31301777	0.019897916	0	0.011408536	0.01035725	0.645318528	0.019897916	0	0.011408536	0.01035725	0.618635538
Riaz_Pt94_Pre	Riaz_Pt94	C4	SKCM	SKCM.BRAF	1526.99942	1599.999936	556.0004327	383.5001413	3673.53984	7.030738996	8.742873205	5.424231927	0	2.685831621	NA	NA	0.062081702	0.032495841	0	0.013895877	0	0.033658669	0.02110048	0.400512771	0.005747126	0.01695447	0.027483292	0.033622716	0.012795163	0	0.062842905	0.010656895	0.077777515	0	0.116188503	0.027866798	0.019902596	0.024416681	0.447024599	0.033622716	0	0.022701595	0.013895877	0.482755213	0.033622716	0	0.022701595	0.013895877	0.455271921
Riaz_Pt98_On	Riaz_Pt98	C4	SKCM	SKCM.TripleWt	1502.96844	1674.67993	486.5000216	3145.999	1777.99995	7.206299908	7.708970073	3.582321589	1	2.045174538	NA	NA	0.015876183	0	0	0.007844396	0	0.028522691	0.07450345	0.490573312	0	0.000467	0.011169315	0.003380972	0.047805567	0	0.031048381	0.02175276	0	0	0.168731912	0.064210828	0.023031719	0.011081244	0.383538593	0.003380972	0	0.000467	0.007844396	0.604768769	0.003380972	0	0.000467	0.007844396	0.593599454
Riaz_Pt98_Pre	Riaz_Pt98	C4	SKCM	SKCM.TripleWt	1625.0003	617.00027	70.000015	563.99981	1674.996265	6.43640219	7.027409873	3.85723217	1	2.045174538	NA	NA	0.057409186	0	0	0.018083206	0	0.038054098	0.029687223	0.599501538	0	0.02727711	0.018883081	0.00649747	0.016376383	0	0.019133423	0	0.03876366	0	0.084511604	0.030975621	0.014368422	0.000478	0.262016275	0.00649747	0	0.02727711	0.018083206	0.68612594	0.00649747	0	0.02727711	0.018083206	0.667242859
Van_Pat02	NA	C6	SKCM	SKCM.NA	347.00117	2482.01195	500.501267	360.50091	1974.00857	7.824883856	7.893066537	3.580451009	0	4.468172485	1	538	0.015532004	0.001185626	0	0	0	0.448681499	0.019462956	0.205697778	0.004253063	0.097711883	0.010651159	0	0.024063338	0	0.022337518	0	0.024896498	0	0.040300171	0.042045627	0	0.043180881	0.213541663	0	0	0.101964946	0	0.684493391	0	0	0.101964946	0	0.673842233
Van_Pat03	NA	C4	SKCM	SKCM.NA	1078.00147	1364.00201	75.5001	849.00056	4283.9911	7.121839684	8.440612474	8.280209641	1	0.273785079	1	76	0.012604665	0.009221547	0	0.028960493	0.00292952	0.049437798	0.009707676	0.416525648	0	0.271456797	0.033424194	0.001816248	0.018695103	0.009989884	0	0	0.042547521	0.035058096	0.008721072	0.048903737	0	0	0.185741625	0.001816248	0.00292952	0.271456797	0.028960493	0.509095317	0.001816248	0.00292952	0.271456797	0.028960493	0.475671123
Van_Pat04	NA	C4	SKCM	SKCM.NA	754.00022	909.99957	109.564466	324.5	2413	5.937669659	8.051754455	7.852129705	0	2.702258727	0	646	0.014490728	0.005574706	0	0.004595133	0.00283114	0.098156666	0.043373542	0.29540127	0.045496903	0	0.026074896	0.002810543	0.10449992	0	0.031860928	0.051312028	0	0	0.146406681	0.116738875	0.009443817	0.000932	0.481259906	0.002810543	0.00283114	0.045496903	0.004595133	0.463006375	0.002810543	0.00283114	0.045496903	0.004595133	0.436931478
Van_Pat06	NA	C2	SKCM	SKCM.NA	833.00248	3128.998	1516.500175	5407.493869	3150.99936	7.855694907	8.827280878	5.646041833	1	0.440793977	1	77	0.063012291	0.070753292	0.028972792	0	0	0.003182359	0.031949315	0.179968116	0	0.027334756	0.178339674	0	0	0.030198399	0.106222437	0.078236058	0.001915055	0.118139025	0.070789902	0.01098653	0	0	0.550252989	0	0	0.027334756	0.028972792	0.393439463	0	0	0.027334756	0.028972792	0.215099789
Van_Pat08	NA	C2	SKCM	SKCM.NA	1004.99983	1430.99983	617.5005	1865.501165	2287.0007	7.049983222	8.308478433	3.11851357	1	0.38329911	1	73	0.024262126	0.021383821	0	0.010652989	0	0.147684254	0.086922974	0.229053349	0	0.020111931	0.043489212	0	0	0.037243406	0.091615533	0.081196942	0	0.094053215	0.051172054	0.059492305	0	0.001665889	0.462085291	0	0	0.020111931	0.010652989	0.507149789	0	0	0.020111931	0.010652989	0.463660577
Van_Pat118	NA	C3	SKCM	SKCM.BRAF	1579.9405	3455.00292	1286.000725	1506.50112	4262.0012	8.027929542	8.006320218	2.733076789	1	0.856947296	1	120	0.054558962	0.015216813	0.004224154	0.013669803	0	0.015243103	0.033155158	0.248902957	0	0.113347064	0.029151974	0.005587045	0.050447455	0	0.042264749	0.044405285	0.151480593	0.048130537	0.097973503	0.026027676	0.006213169	0	0.536718742	0.005587045	0	0.113347064	0.017893957	0.326453192	0.005587045	0	0.113347064	0.017893957	0.297301218
Van_Pat119	NA	C4	SKCM	SKCM.NA	1148.0044	527.0005	195.499705	699.999915	1664.0021	6.043849833	8.351208719	1.086509315	0	2.212183436	1	108	0.09559826	0.0184822	0.01122181	0.01011881	0	0.028827036	0.024838473	0.263788775	0.006709715	0.021704547	0.046797477	0.002160548	0.008510405	0.004922761	0.034367639	0.050327225	0.230511702	0.092849131	0.005011308	0.022126483	0.021125697	0	0.583832809	0.002160548	0	0.028414262	0.021340619	0.364251762	0.002160548	0	0.028414262	0.021340619	0.317454284
Van_Pat123	NA	C4	SKCM	SKCM.NA	1607.00011	812	205.42735	600.00065	3001	6.606687008	7.66570996	0.749603956	1	2.335386721	1	544	0.049415656	0.022748489	0	0.018469989	0.01264755	0.017215407	0.047914684	0.31238421	0.002297151	0.023669878	0.058143993	0	0.031241756	0	0.047034674	0.04650498	0.057648902	0	0.120075027	0.107758549	0	0.024829104	0.507257137	0	0.01264755	0.02596703	0.018469989	0.435658294	0	0.01264755	0.02596703	0.018469989	0.377514301
Van_Pat126	NA	C4	SKCM	SKCM.NA	1562.004	1175.99954	348.999765	949.50005	2309.1463	6.513341126	9.061797954	3.111401294	0	1.754962355	1	187	0.090998036	0	0	0.022161098	0.003631206	0.049418602	0.063143526	0.261688579	0.034696977	0.00873127	0.049287415	0	0.072048174	0	0.030943974	0.004921943	0.137024012	0	0.068516005	0.094394062	0.008395122	0	0.507241328	0	0.003631206	0.043428247	0.022161098	0.423538122	0	0.003631206	0.043428247	0.022161098	0.374250707
Van_Pat14	NA	C6	SKCM	SKCM.BRAF	1198.0004	1203.728442	387.99983	483.999965	3863	7.632232066	8.721770129	3.017217473	1	0.446269678	1	84	0.02633465	0.066535768	0.012306969	0.002212174	0	0.063354645	0.011630629	0.242159441	0.037684881	0.008252001	0.067470326	0.001408867	0.00517486	0.034721924	0.076603357	0.019179066	0.213662341	0.023072271	0.034352259	0.053883571	0	0	0.553520068	0.001408867	0	0.045936882	0.014519143	0.38461504	0.001408867	0	0.045936882	0.014519143	0.317144714
Van_Pat15	NA	C4	SKCM	SKCM.BRAF	648.561834	107	10.00000339	236.49995	2038.0006	7.114108718	7.91255218	6.881639751	1	0.136892539	1	31	0.034814892	0.027392712	0	0.004375381	0.024477261	0.396960691	0.020245137	0.122700061	0.010194383	0.020776987	0.028522201	0	0	0.077012746	0.026131403	0.034326233	0.054729952	0	0.022436778	0.094903181	0	0	0.371747898	0	0.024477261	0.030971371	0.004375381	0.568428089	0	0.024477261	0.030971371	0.004375381	0.539905888
Van_Pat16	NA	C4	SKCM	SKCM.NA	480.0005	412.00078	231.249935	679.001085	792.00054	6.254233259	7.626304759	4.660082007	1	2.220396988	1	84	0.071118686	0.021599591	0	0.01773966	0	0.026255446	0.062288509	0.193055771	0.007036768	0.012542996	0.040796863	0	0.022571028	0.01065168	0.069037419	0.039320711	0.14921941	0.07464763	0.095942214	0.086175619	0	0	0.640283987	0	0	0.019579764	0.01773966	0.322396589	0	0	0.019579764	0.01773966	0.281599726
Van_Pat19	NA	C3	SKCM	SKCM.NA	645	1382.9975	533.0003	545.000465	1998.9952	7.89204917	8.788804195	4.260201271	1	0.479123888	1	21	0.041316922	0.050332797	0	0	0	0.209247692	0.035580656	0.298651414	0.010825412	0.007153891	0.036320571	0	0.02930858	0	0.040733442	0.0090088	0.08389243	0	0.082885441	0.057360629	0	0.007381325	0.402220365	0	0	0.017979303	0	0.579800332	0	0	0.017979303	0	0.543479761
Van_Pat20	NA	C2	SKCM	SKCM.NA	764.7315	523.0002	238.499905	531.49993	1548.00045	7.86873778	8.381355305	2.941218646	1	0.317590691	1	71	0.077168024	0.002552297	0.012688498	0.001273434	0.009301886	0.055018251	0.026315567	0.209552781	0.056418656	0	0.046072371	0.005866728	0.052518027	0	0.102218314	0.026129039	0.145184947	0	0.093096654	0.067435755	0	0.011188772	0.577491829	0.005866728	0.009301886	0.056418656	0.013961932	0.33695897	0.005866728	0.009301886	0.056418656	0.013961932	0.290886599
Van_Pat25	NA	C4	SKCM	SKCM.NA	1030.00042	1090.0158	381.499745	7798.5025	2477.0033	7.317203862	7.828214998	2.836667605	1	0.889801506	1	67	0.043779162	0.017088115	0.003516152	0.001472723	0.006815265	0.030837061	0.035333553	0.249044571	0.015447134	7.12E-05	0.028755387	0.00419519	0.029974519	0	0.237373821	0.011319689	0.009206657	0	0.168428958	0.098784242	0	0.008556594	0.624511757	0.00419519	0.006815265	0.015518342	0.004988875	0.343970572	0.00419519	0.006815265	0.015518342	0.004988875	0.315215185
Van_Pat27	NA	C4	SKCM	SKCM.NA	1151.0002	2732.00308	159.00009	780.99974	2731.005	7.379215708	7.94492656	3.642187002	0	3.775496235	1	139	0.02191011	0	0	0	0	0.462388481	0.009896659	0.329204637	0	0.031043393	0	0	0.003931315	0.003033529	0.00637347	0.02882007	0.006133002	0.024360614	0.034381502	0.038311986	0	0.000211	0.167466831	0	0	0.031043393	0	0.801489776	0	0	0.031043393	0	0.801489776
Van_Pat28	NA	C2	SKCM	SKCM.NA	937	1608.999982	499.2904	2571.50365	1494.00049	7.288856235	8.371798619	1.7813757	1	3.241615332	1	77	0.013294177	0.008332406	0	0.00058	0.005155929	0.075328373	0.071503511	0.177598105	0.010189847	0	0.044531127	0	0.080360549	0	0.041552203	0.070019874	0	0	0.217435466	0.153984534	0.009012959	0.021120947	0.615113115	0	0.005155929	0.010189847	0.00058	0.368961117	0	0.005155929	0.010189847	0.00058	0.32442999
Van_Pat29	NA	C2	SKCM	SKCM.NA	1048.000235	1621.9989	1517.503	791.999275	2766	7.594193212	8.251018275	6.064699507	0	3.630390144	1	341	0.2355082	0.113411196	0.004069375	0	0	0.085122388	0.011423738	0.124188418	0	0.006290629	0.017807725	0	0	0.035498912	0.102115158	0.054454868	0.091602824	0.09008667	0.007337028	0.02108287	0	0	0.751097727	0	0	0.006290629	0.004069375	0.238542269	0	0	0.006290629	0.004069375	0.220734544
Van_Pat33	NA	C4	SKCM	SKCM.NA	1255.001	518.0003	47.0001	1027.00015	2540.99989	6.776701404	8.647607563	2.508210082	1	0.577686516	1	211	0.0748005	0	0.030625943	0.027200084	0.024474463	0.206468519	0.010951919	0.256800403	0.037333388	0	0.058844817	0	0	0.056185356	0.028447642	0.016189339	0.015274348	0.063990308	0	0.069041169	0.023371801	0	0.347300463	0	0.024474463	0.037333388	0.057826027	0.533065658	0	0.024474463	0.037333388	0.057826027	0.474220841
Van_Pat36	NA	C4	SKCM	SKCM.BRAF	1081.99981	415.000551	16.00001502	1846.499045	2865.84952	5.663979617	7.746036028	0.663441878	1	0.147843943	1	41	0	0.043792241	0	0	0.016457842	0.282853799	0.035199951	0.273958262	0	0.033708216	0.039996953	0	0	0.084929702	0.018583751	0	0.083900141	0.014599345	0	0.064458263	0.000257	0.007304319	0.317824978	0	0.016457842	0.033708216	0	0.632008964	0	0.016457842	0.033708216	0	0.592012011
Van_Pat37	NA	C4	SKCM	SKCM.NA	1359.00112	721.9995	202.59934	1055.4999	3449.99224	6.349487198	8.498504039	7.667454513	1	0.191649555	1	23	0.019599455	0.008249088	0	0.009479701	0.005432489	0.05591977	0.057552056	0.302211284	0.004322926	0.006021485	0.056071636	0	0.009616093	0.00558784	0.045502842	0.16774302	0.074392389	0	0.11579498	0.056502947	0	0	0.502988653	0	0.005432489	0.010344411	0.009479701	0.471754746	0	0.005432489	0.010344411	0.009479701	0.41568311
Van_Pat38	NA	C2	SKCM	SKCM.NA	1528.00016	3981.002	1726.50329	1085.0006	4508.00543	8.256847672	8.873418378	5.267042428	0	4.213552361	1	302	0.01224515	0.027442701	6.97E-05	0.016115508	0	0.130648243	0.04580517	0.207216653	0.031547939	0	0.05618304	0	0.076287805	0	0.046178931	0.041839843	0	0	0.195524985	0.103744935	0	0.009149411	0.512413762	0	0	0.031547939	0.016185192	0.439853107	0	0	0.031547939	0.016185192	0.383670066
Van_Pat39	NA	C3	SKCM	SKCM.NA	636.001	1976.931	1011.844207	1167.500605	2271	7.248438586	7.808591224	2.724863126	0	4.07118412	0	1487	0.246609507	0.036955061	0.006818647	0	0	0.000766	0.011917426	0.208582226	0.004612818	0.082740012	0.083335791	0	0.002301316	0.011892357	0.024165146	0.006131078	0.110719515	0.09581314	0.041708967	0.02075007	0.003787092	0.000393	0.601226628	0	0	0.08735283	0.006818647	0.304601895	0	0	0.08735283	0.006818647	0.221266103
Van_Pat40	NA	C4	SKCM	SKCM.NA	879.00046	943.0003	95.500015	862.500115	2494.0045	7.731497257	8.691440672	8.565568848	1	0.093086927	1	34	0.049300235	0	0	0	0.006395967	0.338548818	0.018037424	0.194366493	0.125212563	0	0.052937802	0	0.013223477	0.025706382	0.018861239	0.014118958	0.075556409	0.042026045	0	0.025708187	0	0	0.264500932	0	0.006395967	0.125212563	0	0.603890537	0	0.006395967	0.125212563	0	0.550952735
Van_Pat41	NA	C4	SKCM	SKCM.NA	5	5	0	3	19.99999173	3.040186708	7.360362609	7.651051691	1	0.350444901	1	54	0.031987726	0	0.000603	0.009550422	0.014157684	0.356228097	0.00538634	0.159214237	0	0.053624361	0.087352995	0	0	0.027630201	0.094525832	0.012733752	0.062659632	0.060115803	0.022496936	0.001733267	0	0	0.313883147	0	0.014157684	0.053624361	0.010153139	0.608181669	0	0.014157684	0.053624361	0.010153139	0.520828674
Van_Pat43	NA	C3	SKCM	SKCM.NA	495.0312	1904.0021	795.00086	972.001435	1490.001	7.895110466	8.268060223	3.133323088	1	0.101300479	1	37	0.021429806	0	0	0.00013	0	0.019015034	0.028493903	0.253869441	0	0.101317589	0.020576543	0	0.080239594	0	0.126520479	0	0.083531238	0	0.194633563	0.052814235	0.013226917	0.004201436	0.576597267	0	0	0.101317589	0.00013	0.321954921	0	0	0.101317589	0.00013	0.301378378
Van_Pat44	NA	C4	SKCM	SKCM.NA	971.00088	116.00008	5.5000028	89.99997562	2014	4.694281862	8.082929377	1.172434698	1	0.741957563	1	62	0.096049126	0.025829892	0.018968044	0.024738978	0	0.019964772	0.003999547	0.252452099	0.005598928	0.12784209	0.036912808	0.007351792	0	0.092780884	0.033188684	0.06606267	0.055860385	0.032401758	0.02093275	0.079064792	0	0	0.502170941	0.007351792	0	0.133441018	0.043707022	0.313329227	0.007351792	0	0.133441018	0.043707022	0.276416419
Van_Pat45	NA	C4	SKCM	SKCM.NA	617.91515	103.0001	7	388.500085	1305	5.792645551	7.992767179	0	1	0.24366872	1	61	0.065950217	0.013604357	0.008042269	0.009245399	0.028829172	0.187047587	0.016653868	0.19259119	0.038797568	0.038435898	0.023968902	0.002873614	0	0.068873131	0.065072147	0.028183942	0.093695013	0.051748151	0.017726014	0.047667037	0.000995	0	0.453514533	0.002873614	0.028829172	0.077233467	0.017287668	0.420261546	0.002873614	0.028829172	0.077233467	0.017287668	0.396292645
Van_Pat46	NA	C4	SKCM	SKCM.NA	826.00014	1295.999186	102.000035	321.4998	3004.9031	7.381934466	8.453555941	1.399828077	1	0.438056126	1	36	0.032666933	0	0	0	0.004164933	0.182061235	0.015493275	0.390662172	0.076339128	0	0.080292987	0	0.030024127	0	0.044972864	0	0.088970379	0.018278652	0.0161677	0.019905614	0	0	0.25098627	0	0.004164933	0.076339128	0	0.668509669	0	0.004164933	0.076339128	0	0.588216683
Van_Pat47	NA	C4	SKCM	SKCM.NA	511.9996	380.5051	40	3815.00209	1479	7.089942396	8.381842138	1.038472303	0	3.028062971	0	1106	0	0.087753965	0.020611807	0.002176676	0.00762836	0.252820994	0.013784436	0.217793222	0.013772227	0.011760703	0.027912261	0	0	0.061446568	0.110369656	0.019982666	0.023390133	0	0.026387444	0.065389747	0	0.037019136	0.431739315	0	0.00762836	0.025532929	0.022788483	0.512310913	0	0.00762836	0.025532929	0.022788483	0.484398652
Van_Pat49	NA	C2	SKCM	SKCM.NA	1306.00105	3834.36128	3191.00295	7696.001645	3557.004	7.60387036	8.929811228	5.880170372	0	2.830937714	1	163	0.064298718	0.03200033	0.001044373	0	0	0.023714783	0.059500378	0.134704809	0.007002213	0.003610554	0.022594418	0	0.040942266	0.001487824	0.116509023	0.068547439	0	0.064635061	0.25940011	0.082977971	0	0.017029727	0.74782847	0	0	0.010612768	0.001044373	0.240514389	0	0	0.010612768	0.001044373	0.217919971
Van_Pat50	NA	C4	SKCM	SKCM.NA	746.0009	573.00083	159.500185	522.000345	1518.99809	5.928147172	8.376399275	5.024766266	1	0.177960301	1	65	0.059316028	0.011661215	0	0.008812628	0.004696325	0.177666813	0.034343769	0.237334044	0.013512788	0.015725798	0.030890085	0.002311118	0.001293863	0.041845364	0.078777848	0.063646492	0.057435262	0	0.089034399	0.064491118	0	0.007205043	0.474706632	0.002311118	0.004696325	0.029238586	0.008812628	0.480234711	0.002311118	0.004696325	0.029238586	0.008812628	0.449344627
Van_Pat79	NA	C2	SKCM	SKCM.NA	682	344.99987	157.49996	357.499805	1511.998294	6.638204895	8.405105318	1.75743514	1	2.19301848	1	405	0.029591094	0.059628448	0	0.00952814	0.005690597	0.046080169	0.038909191	0.233760503	0.006198328	0.011684899	0.046997339	0	0.008367493	0.026627926	0.10706802	0.028892954	0.155692665	0.01275767	0.086970954	0.08555361	0	0	0.601150834	0	0.005690597	0.017883228	0.00952814	0.365747201	0	0.005690597	0.017883228	0.00952814	0.318749863
Van_Pat80	NA	C4	SKCM	SKCM.NA	1545.9151	1753.00116	367.000285	856.50048	3405.999	7.391237145	8.752591798	1.020666352	1	1.98220397	1	182	0.023229189	0.020728225	0	0	0	0.402381078	0.039095925	0.194776739	0.008530017	0.00283582	0.006109803	0	0	0.043351378	0.047802001	0.062619736	0	0.00087	0.054665069	0.065093705	0.00658168	0.021330036	0.346270618	0	0	0.011365837	0	0.642363545	0	0	0.011365837	0	0.636253742
Van_Pat81	NA	C4	SKCM	SKCM.NA	552.0003	616.98161	23.28938	422.000183	2306.9999	6.156430602	7.984157904	2.547579342	1	1.719370294	1	76	0.064821678	0	0	0.010753273	0.01032806	0.130620843	0.01446312	0.400484852	0	0.052507703	0.059255639	0	0	0.045901511	0.031763395	0.051613249	0.039905381	0.011933903	0.007918619	0.067728773	0	0	0.32158651	0	0.01032806	0.052507703	0.010753273	0.604824454	0	0.01032806	0.052507703	0.010753273	0.545568815
Van_Pat83	NA	C3	SKCM	SKCM.NA	857.6246	1467.00021	909.000045	962.999841	2139.592747	6.975029489	7.824497305	4.128955809	0	2.811772758	1	107	0.012491883	0.052765289	0	0.009349329	0	0.084783974	0.049967537	0.176769214	0.009556788	0	0.039404488	0	0.035608844	0	0.147208956	0.029011969	0	0.013301716	0.251380212	0.047630873	0.005608479	0.03516045	0.63016867	0	0	0.009556788	0.009349329	0.350925213	0	0	0.009556788	0.009349329	0.311520724
Van_Pat85	NA	C2	SKCM	SKCM.NA	966.98791	4952.0017	3686.50085	3510.50249	3812.00692	8.231904482	8.538392777	2.904149744	1	1.253935661	1	83	0.022013174	0.024494006	0	0.009110433	0.010113337	0.002736051	0.062200022	0.181242874	0.060570185	0	0.040724221	0.004724698	0.08270571	0	0.064141532	0.030362299	0	0	0.246213732	0.127599582	0	0.031048141	0.628578178	0.004724698	0.010113337	0.060570185	0.009110433	0.286903168	0.004724698	0.010113337	0.060570185	0.009110433	0.246178947
Van_Pat86	NA	C4	SKCM	SKCM.NA	742.0004	885.9999663	102.499825	618.49974	2201.65268	6.510301249	7.782332342	0.793386129	1	0.802190281	1	153	0.074637629	0.00269047	0.005247661	0.013959262	0	0	0.026263086	0.461964162	0	0.044048009	0.093731727	0	0.020770673	0.020356813	0.033407819	0.012107449	0.037713712	0	0.057297334	0.068837461	0.01071472	0.016252013	0.354786093	0	0	0.044048009	0.019206923	0.581958975	0	0	0.044048009	0.019206923	0.488227248
Van_Pat88	NA	C2	SKCM	SKCM.NA	1368.00189	2786.05759	1795.502055	2436.5051	2775.00307	7.519240508	8.751772856	0	0	2.707734428	0	665	0.062250657	0	0	0	0	0.123464185	0.087085813	0.078901698	0.03482393	0	0.040209502	0	0.092763642	0	0.044107419	0.021253461	0	0	0.274954753	0.111826509	0	0.02835843	0.635514872	0	0	0.03482393	0	0.329661198	0	0	0.03482393	0	0.289451696
Van_Pat90	NA	C2	SKCM	SKCM.NA	1179.00076	1129.5119	424.50027	1329.000165	2339.0029	7.067174062	8.286187838	2.981223629	0	2.751540041	0	669	0.07611302	0.031922214	0	0.003960333	0	0.089004943	0.044622705	0.197621637	0	0.031826069	0.032925024	0	0	0.051749972	0.092771641	0.015003454	0.115156895	0.169015958	0.029185787	0.019120348	0	0	0.600039289	0	0	0.031826069	0.003960333	0.364174309	0	0	0.031826069	0.003960333	0.331249286
Van_Pat91	NA	C2	SKCM	SKCM.NA	853.00567	1019.0002	281.00027	854.50037	1732.99985	7.414442387	8.811257655	2.140791733	1	1.861738535	0	680	0.00911865	0.031261026	0	0.009054357	0.007892905	0.052364065	0.046645375	0.330040788	0.078545208	0	0.028124376	0	0.047424034	0	0.115031419	0.012191587	0.092424536	0	0.062100952	0.076571888	0	0.001208833	0.447332926	0	0.007892905	0.078545208	0.009054357	0.457174605	0	0.007892905	0.078545208	0.009054357	0.429050229
Van_Pat98	NA	C4	SKCM	SKCM.NA	926.99961	964.99924	254.99999	3030.99965	2162.0044	7.423205697	8.229234056	2.762940125	1	0.38329911	1	77	0.060000897	0.015966972	0	0	0.015400712	0.335143984	0.036492173	0.198863481	0.057620138	0	0.024266534	0	0	0.017188646	0.039688626	0.014458183	0.062019752	0	0.03704096	0.055263006	0.016495955	0.01408998	0.332212977	0	0.015400712	0.057620138	0	0.594766173	0	0.015400712	0.057620138	0	0.570499639
[truncated: 36 more columns]
