# Supplementary material for: Construction and Validation of a Tumor Microenvironment-Based Scoring System to Evaluate Prognosis and Response to Immune Checkpoint Inhibitor Therapy in Lung Adenocarcinoma Patients
Source: Genes (Basel). 2022 May 26;13(6):951. doi: 10.3390/genes13060951 (PMC9222903; doi:10.3390/genes13060951)
Supplement: Supplementary file 1 [file genes-13-00951-s001.zip › Supplementary table S4.xlsx]

## Sheet: Sheet1
Name	Hazard.Ratio	CI95	CI_low	CI_high	P.Value	coefficients
Bcell_receptors_score	0.973208	0.95922249-0.98739702	0.959222	0.987397	0.000235675	-0.0271576
CD103pos_mean_25446897	0.962321	0.94406365-0.98093201	0.944064	0.980932	8.49853e-05	-0.0384069
CHANG_CORE_SERUM_RESPONSE_UP	1.11154	1.05764546-1.16818398	1.05765	1.16818	3.04547e-05	0.105748
IgG_19272155	0.981369	0.97051666-0.99234366	0.970517	0.992344	0.000917824	-0.0188063
Module11_Prolif_score	1.02395	1.01194812-1.03609891	1.01195	1.0361	8.35449e-05	0.02367
B_Cell_cluster	0.981555	0.97168989-0.99152054	0.97169	0.991521	0.000303579	-0.0186171
B_cells_ImSig	0.977758	0.965316-0.99036032	0.965316	0.99036	0.000576574	-0.0224931
Proliferation_ImSig	1.02097	1.01019658-1.03185232	1.0102	1.03185	0.000125641	0.0207502
T_cells_MCPcounter	0.975433	0.96110165-0.98997766	0.961102	0.989978	0.000988362	-0.024874
B_lineage_MCPcounter	0.982008	0.9726679-0.99143854	0.972668	0.991439	0.000196637	-0.0181554
Myeloid_dendritic_cells_MCPcounter	0.984874	0.97600898-0.99381995	0.976009	0.99382	0.000954174	-0.0152414
Cell_cycle	1.07187	1.03417478-1.11093815	1.03417	1.11094	0.000144892	0.0694043
Nucleotide_excision_repair	1.10719	1.04673298-1.17112863	1.04673	1.17113	0.000378937	0.101821
B_cells_Danaher_et_al	0.984824	0.9762023-0.99352144	0.976202	0.993521	0.000652603	-0.0152925
TFH_Bindea_et_al	0.934454	0.89928497-0.97099754	0.899285	0.970998	0.0005329	-0.0677933
iDC_Bindea_et_al	0.963331	0.94236087-0.98476697	0.942361	0.984767	0.000877908	-0.0373586
SW480_cancer_cells_Bindea_et_al	1.04564	1.02258343-1.06922302	1.02258	1.06922	8.75418e-05	0.0446322
MDSC_Peng_et_al	1.07266	1.04330879-1.10284298	1.04331	1.10284	7.242e-07	0.0701443
